# Supplementary material for: A systematic review and meta-analysis of trials of social network interventions in type 2 diabetes
Source: PubMed Central journal article supplement — BMJ Open. 2017 Aug 21;7(8):e016506. doi: 10.1136/bmjopen-2017-016506 (PMC5629689; doi:10.1136/bmjopen-2017-016506), 2017-08-21
Supplement: bmjopen-2017-016506.draft_revisions.pdf [file bmjopen-2017-016506.draft_revisions.pdf]

# BMJ Open

BMJ Open is committed to open peer review. As part of this commitment we make the peer review history of every article we publish publicly available.

When an article is published we post the peer reviewers' comments and the authors' responses online. We also post the versions of the paper that were used during peer review. These are the versions that the peer review comments apply to.

The versions of the paper that follow are the versions that were submitted during the peer review process. They are not the versions of record or the final published versions. They should not be cited or distributed as the published version of this manuscript.

BMJ Open is an open access journal and the full, final, typeset and author-corrected version of record of the manuscript is available on our site with no access controls, subscription charges or pay-per-view fees (<http://bmjopen.bmj.com>).

If you have any questions on BMJ Open's open peer review process please email [editorial.bmjopen@bmj.com](mailto:editorial.bmjopen@bmj.com)

# BMJ Open

## It takes a village: a systematic review and meta-analysis of trials of social network interventions in type 2 diabetes

|                                 |                                                                                                                                                                                                                                                                                                                                                      |
|---------------------------------|------------------------------------------------------------------------------------------------------------------------------------------------------------------------------------------------------------------------------------------------------------------------------------------------------------------------------------------------------|
| Journal:                        | <i>BMJ Open</i>                                                                                                                                                                                                                                                                                                                                      |
| Manuscript ID                   | bmjopen-2017-016506                                                                                                                                                                                                                                                                                                                                  |
| Article Type:                   | Research                                                                                                                                                                                                                                                                                                                                             |
| Date Submitted by the Author:   | 21-Feb-2017                                                                                                                                                                                                                                                                                                                                          |
| Complete List of Authors:       | Spencer-Bonilla, Gabriela ; Mayo Clinic, Ponce, Oscar<br>Rodriguez-Gutierrez, R; Mayo Clinic<br>Alvarez-Villalobos, Neri<br>Erwin, Patricia; Mayo Clinic College of Medicine<br>Larrea-Mantilla, Laura<br>Rogers, Anne; University of Southampton, Faculty of Health Sciences<br>Montori, Victor; Mayo Clinic, Knowledge and Encounter Research Unit |
| <b>Primary Subject Heading</b>: | Diabetes and endocrinology                                                                                                                                                                                                                                                                                                                           |
| Secondary Subject Heading:      | Patient-centred medicine, Public health, Nutrition and metabolism                                                                                                                                                                                                                                                                                    |
| Keywords:                       | General diabetes < DIABETES & ENDOCRINOLOGY, Diabetes & endocrinology < INTERNAL MEDICINE, PUBLIC HEALTH                                                                                                                                                                                                                                             |
|                                 |                                                                                                                                                                                                                                                                                                                                                      |

SCHOLARONE™  
Manuscripts

1  
2  
3 **Title:** It takes a village: a systematic review and meta-analysis of trials of social network  
4 interventions in type 2 diabetes  
5  
6

7  
8 **Short title:** Social network interventions in type 2 diabetes  
9

10 **Authors:** Gabriela Spencer-Bonilla<sup>1,2</sup>, Oscar J. Ponce<sup>1,3</sup>, Rene Rodriguez-Gutierrez<sup>1,3</sup>, Neri  
11 Alvarez-Villalobos<sup>1,5</sup>, Patricia J. Erwin<sup>6</sup>, Laura Larrea-Mantilla<sup>1,7</sup>, Anne Rogers<sup>8</sup>, Victor M.  
12 Montori\*<sup>1</sup>  
13  
14  
15

16  
17 **Affiliations:** <sup>1</sup> Department of Medicine, Mayo Clinic, Rochester, MN, 55905, USA.  
18

19  
20 <sup>2</sup> School of Medicine, University of Puerto Rico Medical Sciences Campus, San Juan, PR,  
21 00936, USA  
22

23  
24 <sup>3</sup> Department of Medicine, Universidad Peruana Cayetano Heredia, Lima, 31, Peru  
25

26  
27 <sup>4</sup>Department of Internal Medicine, University Hospital "Dr. Jose E. Gonzalez", Autonomous  
28 University of Nuevo Leon, Monterrey, 66460, Mexico  
29

30  
31 <sup>5</sup>Medical Statistics Department, University Hospital "Dr. Jose E. Gonzalez Autonomous  
32 University of Nuevo Leon", Nuevo León, Monterrey, 64460, México  
33  
34

35  
36  
37 <sup>6</sup>Mayo Medical Library, Mayo Clinic, Rochester, MN, 55905, USA  
38

39  
40 <sup>7</sup>Evidence-Based Practice Center, Mayo Clinic, Rochester, MN, 55905, USA  
41

42  
43 <sup>8</sup>NIHR CLAHRC Wessex, Health Sciences, University of Southampton, Southampton, UK  
44

45 **\* Correspondence to:**

46  
47 Victor M. Montori, MD MSc  
48 Knowledge and Evaluation Research Unit  
49 Division of Endocrinology, Diabetes, Metabolism and Nutrition  
50 Mayo Clinic  
51  
52 200 1st Street SW, Rochester, MN 55905  
53  
54  
55  
56  
57  
58  
59  
60

1  
2  
3 Phone: (507) 293-0175  
4

5 E-mail: [montori.victor@mayo.edu](mailto:montori.victor@mayo.edu)  
6

7 **Word count: 3,108**  
8

9  
10 **Table and figure count: 4**  
11

12  
13 **Supplemental table and figure count: 6**  
14  
15  
16  
17  
18  
19  
20  
21  
22  
23  
24  
25  
26  
27  
28  
29  
30  
31  
32  
33  
34  
35  
36  
37  
38  
39  
40  
41  
42  
43  
44  
45  
46  
47  
48  
49  
50  
51  
52  
53  
54  
55  
56  
57  
58  
59  
60

For peer review only

**ABSTRACT**

**Objectives:** In the care of patients with type 2 diabetes, self-management is emphasized and studied while theory and observations suggest that patients also benefit from social support. We sought to assess the effect of social network interventions on social support, glycemic control, and quality of life in patients with type 2 diabetes.

**Research Design and Methods:** We searched Ovid MEDLINE, Ovid EBM Reviews, Cochrane Central Register of Controlled Trials, EMBASE, PsycINFO, and CINAHL through January 2016 for randomized trials (RCTs) of social network interventions in patients with type 2 diabetes. Reviewers working independently and in duplicate assessed eligibility and risk of bias, and extracted data from eligible RCTs. We pooled estimates using inverse variance random-effects meta-analysis.

**Results:** We found 15 eligible RCTs enrolling 1868 participants. Social network interventions were paradoxically commonly based on individualistic theories of self-management, were educational, and sought to engage social network members for their knowledge and experience. Interventions improved social support (0.86 standard deviations [95% CI: 0.33, 1.39],  $I^2=91\%$ ), and HbA1c at 3 months (-0.24 percentage points [95% CI: -0.36, -0.13],  $I^2=0\%$ ), but not quality of life.

**Conclusions:** Despite a compelling theoretical base, researchers have only minimally studied the value of interventions targeting patients' social networks on diabetes care. Although the body of evidence to date is limited, and based on individualistic theories, the results are promising. This review challenges the scientific community to design and test theory-based interventions that go beyond self-management approaches to focus on the largely untapped potential of social networks to improve diabetes care.

**PROSPERO registration:** CRD42016036117

## ARTICLE SUMMARY

### Strengths and limitations

- This systematic review and meta-analysis was strengthened by a thorough literature search, author contact, reproducible judgments about the inclusion and appraisal of the evidence, and theory-based discussion of its results.
- The review found and summarized few reports of randomized trials testing interventions with poor theoretical alignment and limited protection against bias, which produced imprecise and inconsistent estimates of effect on markers of social support and short-term diabetes control.
- These limitations notwithstanding, this first meta-analysis of randomized trials of social network interventions identified an important knowledge (and practice) gap in the care of patients with type 2 diabetes, and produced a theoretical model connecting social network interventions with outcomes in these and other patients living with chronic conditions.

## 1. INTRODUCTION

Patients with type 2 diabetes are expected to implement self-management practices – self-testing, diet and activity regimens, medication administration – into their daily routines, along with frequent office visits for examination and laboratory testing to reduce the risk of complications of their diabetes and its comorbidities. Patients must have sufficient capacity to shoulder this workload;<sup>1</sup> the workload and its impact on patient functioning and well-being reflect the burden of treatment.<sup>2</sup> Self-management programs based on individualistic theories of knowledge, beliefs and self-efficacy,<sup>3 4</sup> delegate work to patients. Without support or sufficient capacity, these delegations can overwhelm patients and contribute to burden of treatment which is associated with decreased adherence to medical recommendations and exhaustion with self-care.<sup>2</sup>

Patients do not enact the work of self-management in isolation. Rather, social relationships are often cited as essential to managing type 2 diabetes. Observational studies have repeatedly found that better social support is associated with effective diabetes self-management and better efficacy of self-management interventions.<sup>5 6</sup> Social networks can support diabetes self-management by sharing knowledge and by facilitating access to resources, but only to the extent that patients can engage and maintain productive relationships with network members (FIGURE 1).<sup>7</sup> Social networks may, therefore, mitigate (or exacerbate when dysfunctional) the workload patients must shoulder and impact diabetes care. Yet, social networks are not usually considered in the design and evaluation of chronic disease management interventions. Furthermore, the impact of interventions based on social theories and aimed at supporting social networks on the care and outcomes of patients with type 2 diabetes remains unknown.

1  
2  
3 In this review, we summarize the literature evaluating social network interventions tested  
4  
5 in randomized clinical trials (RCTs) that targeted friends, families, peers and communities of  
6  
7 patients with type 2 diabetes. We describe the interventions, their theoretical underpinnings, how  
8  
9 social networks are involved, and the efficacy of the interventions in terms of social support,  
10  
11 quality of life, and glycemic control relative to interventions that did not target patients' social  
12  
13 networks.  
14  
15

## 16 17 **2. METHODS**

### 18 19 ***2.1 Protocol and Registration***

20  
21 This review adhered to the Preferred Reporting Items for Systematic Reviews and Meta-  
22  
23 analysis (PRISMA) Statement<sup>8</sup> and has a registered protocol (PROSPERO registration:  
24  
25 CRD42016036117).<sup>9</sup>  
26  
27

### 28 29 ***2.2 Eligibility Criteria***

30  
31 We included RCTs testing interventions for type 2 diabetes management that  
32  
33 involved patients' social networks (families, friends, peers and communities) in any capacity.  
34  
35 RCTs had to evaluate interventions targeting dyadic (e.g. a spouse or friend) or community (ie.  
36  
37 network of networks like neighborhoods, families and churches) networks<sup>10</sup> based on enduring  
38  
39 social relationships likely to be involved in the patients' lives over the long periods of time  
40  
41 required for self-management.<sup>11</sup> Thus, we excluded RCTs involving social relationships created  
42  
43 for the trial, e.g., RCTs testing interventions enrolling and training patients with type 2 diabetes  
44  
45 to provide peer support to other participants.  
46  
47  
48  
49

### 50 51 ***2.3 Data Sources and Searches***

52  
53 A comprehensive electronic search of Ovid MEDLINE, Ovid EBM Reviews,  
54  
55 Cochrane Central Register of Controlled Trials, EMBASE, PsycINFO, and EBSCO CINAHL  
56  
57  
58  
59  
60



1  
2  
3 was performed from inception of each database through January 2016 to identify published  
4  
5 studies and conference abstracts. Working with an experienced medical librarian (P.J.E), G.S-B.  
6  
7 developed a sensitive search strategy to identify eligible RCTs. Previous qualitative studies in the  
8  
9 field<sup>4 7 10</sup> were used to identify relevant search terms such as descriptors of the constitution or  
10  
11 properties of social networks (e.g. *social, couples, spouse, family* and *church*) and terms related  
12  
13 to relationships (e.g. *stigma and support*). The full search strategy is available as **Supplemental**  
14  
15 **Table S5**. There were no restrictions by date of publication or language. Reference lists of  
16  
17 included articles, reviews and qualitative syntheses on the topic were hand-searched to identify  
18  
19 any potentially eligible studies that may have been missed by our electronic search strategy. An  
20  
21 expert in the field (A.R.) reviewed the list of included studies for missed articles.  
22  
23  
24  
25  
26

#### 27 **2.4 Study Selection**

28  
29 Three reviewers (G.S.B, R.R-G. and O.J.P.), working independently, in pairs, and in  
30  
31 duplicate, considered the eligibility of titles and abstracts that resulted from the search after  
32  
33 calibrating with 20 abstracts. As part of calibration, eligibility criteria were iterated for clarity  
34  
35 and consistency while considering examples of pre-existing and made-for-the-trial social  
36  
37 networks.  
38  
39

40  
41 Reviewers, working independently and in duplicate, considered all available full-text  
42  
43 reports for eligibility, obtained if at least one reviewer considered the abstract potentially  
44  
45 eligible. Before full-text screening, the reviewers calibrated their judgments using 10 eligible  
46  
47 reports. Reasons for exclusion were not mutually exclusive, therefore reviewers agreed to  
48  
49 prioritize reasons for exclusion as follows: (1) inappropriate population, (2) unsuitable study  
50  
51 design, (3) inappropriate intervention, and (4) no outcomes of interest reported. After completion  
52  
53 of full-text screening, chance-adjusted agreement was quantified using the kappa statistic,<sup>12</sup> and  
54  
55  
56  
57  
58  
59  
60

1  
2  
3 disagreements resolved by discussion and consensus among the three reviewers. We  
4  
5 subsequently searched MEDLINE with the first and last authors' last names for protocols for  
6  
7 other relevant publications (e.g., pilots and results at different follow-up lengths) to obtain  
8  
9 additional details about the included RCTs.  
10  
11

## 12 ***2.5 Data Extraction and Quality Assessment***

13  
14  
15 The three reviewers, calibrated using two reports, performed data extraction  
16  
17 independently and in duplicate using a standardized form. Extracted data included a full  
18  
19 description of study characteristics: design, setting where recruitment took place, participant  
20  
21 eligibility criteria, conceptual frameworks justifying the interventions, and of baseline participant  
22  
23 characteristics. For each intervention, we sought details about who delivered the intervention, to  
24  
25 whom (which members of the social network were involved), dose (duration and frequency of  
26  
27 sessions, total contact time), and fidelity (monitoring of fidelity to the protocol and extent of  
28  
29 participant attendance and reasons for non-attendance). We planned to extract the following  
30  
31 outcomes: quality of life, social support, treatment burden, metabolic control, and diabetes-  
32  
33 related morbidity and mortality; no trials however, reported treatment burden, or diabetes-related  
34  
35 morbidity and mortality as outcomes measures.  
36  
37  
38  
39

40  
41 Due to the heterogeneity of included interventions, we described and classified  
42  
43 intervention and comparator components using modified versions of previously published  
44  
45 frameworks.<sup>7 13</sup> After piloting this procedure with 2 RCTs, two reviewers classified the  
46  
47 interventions using line-by-line coding of trial methods. Conflicts were resolved by consensus.  
48  
49  
50

51  
52 The three reviewers, independently and in duplicate, assessed each RCT's risk of bias  
53  
54 using the Cochrane tool,<sup>14</sup> recognizing the impossibility of blinding participants and  
55  
56 interventionists (persons delivering the intervention, e.g. physician, nurse educators) to  
57  
58  
59  
60

1  
2  
3 intervention allocation.<sup>15</sup> These could not be disregarded, however, because subjective and  
4  
5 patient-reported outcomes were assessed. Publication bias could not be assessed statistically or  
6  
7 graphically given the small number and inconsistency of included RCTs. The overall confidence  
8  
9 in the results was rated using the Grading of Recommendations Assessment, Development and  
10  
11 Evaluation (GRADE) approach.<sup>16</sup>  
12  
13

## 14 **2.6 Author Contact**

15  
16  
17 For all included RCTs, we asked the corresponding author via email to complete a  
18  
19 table of missing data and risk of bias information. Non-responders received a second  
20  
21 communication two weeks later. Four of 15 authors responded with complete or partial data; one  
22  
23 author reported no longer having access to necessary data.  
24  
25  
26

## 27 **2.7 Data Synthesis and Analysis**

28  
29  
30 We used Review Manager version 5.3 to conduct meta-analyses.<sup>17</sup> When possible, we  
31  
32 generated meta-analytic estimates of treatment effects using the inverse variance random-effects  
33  
34 model. When trials had more than one comparator to the intervention of interest, we chose the  
35  
36 arm whose procedures most resembled usual care or no intervention, as this was the most  
37  
38 common comparator for two-arm trials. Meta-analyses generated either a weighted mean  
39  
40 difference expressed in usual units (e.g., HbA1c) or a mean difference expressed in standard-  
41  
42 deviation units, a common approach that enables pooling across different scales assessing the  
43  
44 same construct (e.g., quality of life). A standardized mean difference (SDM) of 0.5 standard  
45  
46 deviations or greater was considered important.<sup>18</sup>  
47  
48  
49  
50  
51

52 To determine the impact of interventions on HbA1c, we pooled results at 3 months  
53  
54 (represented by studies reporting results from 2 to 4 months of follow-up), 6 months (5-7 months  
55  
56 of follow-up) or greater (>7 months of follow up). Otherwise, values at longest follow-up were  
57  
58  
59  
60

1  
2  
3 used for all outcomes. Missing measures of variability were imputed either from data reported at  
4  
5 another time-point in the same trial and in the same arm (when available) or as the average  
6  
7 standard deviation observed across all RCTs. Inconsistency for each outcome not attributable to  
8  
9 chance was assessed visually using forest plots and estimated using the  $I^2$  statistic.  $I^2 < 25\%$   
10  
11 reflected low inconsistency;  $I^2 > 75\%$  reflected high inconsistency.<sup>19</sup>  
12  
13  
14

## 15 **2.8 Subgroup Analyses**

16  
17 To understand inconsistency in results, we planned a few subgroup analyses on social  
18  
19 support, HbA1c results and quality of life, but sparse data prevented the latter. We tested  
20  
21 treatment interactions with risk of bias (low vs. moderate or high), level of glycemic control at  
22  
23 baseline (mean baseline HbA1c > 8%), and intervention features. Network subgroups were drawn  
24  
25 by whether the target of the intervention was (1) a patient- or an investigator-selected (by  
26  
27 protocol, e.g., the patient's spouse) social network member; (2) a member of the patient's  
28  
29 household or not as reported in the trial inclusion criteria; (if the social network member  
30  
31 involved was a spouse, they were assumed to be household members); and (3) a dyadic network  
32  
33 or a group of more than two people. We also tested subgroups based on whether the intervention  
34  
35 was based on a specific underlying framework or not, and on the duration in contact minutes  
36  
37 with the interventionist using a median split. For each analysis, we estimated the subgroup effect  
38  
39 and conducted a test of interaction. Because most subgroup analyses were underpowered and  
40  
41 exploratory, we did not adjust alpha levels for multiple comparisons.  
42  
43  
44  
45  
46  
47  
48

## 49 **3. RESULTS**

### 50 **3.1 Study Selection**

1  
2  
3 **Figure 2** demonstrates the study selection process. We found 1024 records (7 of which were  
4 identified through hand-search); 113 were identified as potentially eligible for inclusion after title  
5 and abstract screening. We reproducibly ( $k=.81$ ) included 15 trials; 13 patient-randomized trials  
6  
7  
8  
9  
10 <sup>20-29 30-32</sup> and 2 cluster-randomized trials <sup>33 34</sup>; overall these trials enrolled 1868 participants.

### 11 12 **3.2 Study Characteristics**

13  
14  
15 **Supplemental Table S1** describes these RCTs. Eight of the 15 RCTs reported an  
16 underlying framework for the intervention either in publication or after author contact.<sup>20 23 24 27 30</sup>  
17  
18 <sup>31 34</sup> While variability in all study characteristics was the norm, most RCTs took place in the  
19 community, with the experimental intervention delivering education, information transfer, goal-  
20 setting and problem solving (**Figure 3**). Social networks -- family members, spouses or partners -  
21  
22 - were most commonly employed to share knowledge and experience. Overall chance-adjusted  
23 agreement for classification of intervention and comparator procedures (**Figure 3**) was good  
24 (kappa=.77); comparators used in trials were heterogeneous. **Supplemental Table S2** describes  
25 baseline characteristics of RCT participants. One RCT only enrolled patients with diabetes and a  
26 history of an acute coronary event;<sup>30</sup> another required participants to also have uncontrolled  
27 hypertension.<sup>35</sup> Two trials only enrolled women.<sup>25 28</sup>

### 28 29 30 31 32 33 34 35 36 37 38 39 40 41 **3.3 Risk of Bias**

42  
43 The overall risk of bias was judged to be moderate for all outcomes (**Supplemental**  
44 **Figure S1, Table S3**). Allocation concealment and blinding of outcome assessor were often  
45 unclear; some studies lost up to one third of participants to follow-up. Outcome reporting was  
46 deemed complete for most trials. When considering the body of evidence, unexplained  
47 inconsistency in results across RCTs further reduced confidence in the overall results,  
48 particularly for the social support outcome.  
49  
50  
51  
52  
53  
54  
55  
56  
57  
58  
59  
60

### 3.4 Meta-analysis

#### 3.4.1 Self-reported outcomes

After pooling the results from the 6 RCTs reporting social support (775 total participants), we found a large increase in self-reported social support, SDM 0.86 (95% CI, 0.33 to 1.39), with high inconsistency in results across trials ( $I^2=91\%$ ) (**Figure 4**). A larger effect was demonstrated for studies enrolling patients with mean baseline HbA1c >8% (**Supplemental Table S4**). Inconsistency remained otherwise unexplained.

Both wellbeing and self-rated health (with mental and physical score components) scales assessed quality of life. When pooled, neither well-being scales (2 trials, 282 participants; SMD 0.62 [95% CI, -0.13 to 1.37],  $I^2=91\%$ ) nor the physical (3 trials, 470 participants; SMD 0.04 [95% CI, -0.14 to 0.22],  $I^2=0\%$ ) and mental (3 trials, 470 participants; SMD -0.02 [95% CI, -0.22 to 0.17],  $I^2=14\%$ ) self-rated health measures showed significant improvements (**Figure 4**).

#### 3.4.2 Biomedical outcomes

When pooled, the 6 trials reporting HbA1c at 3 months, showed significant lowering (684 participants; mean difference (MD) -0.24 [95% CI, -0.36 to -0.13]) with minimal inconsistency across trials ( $I^2=0\%$ ). No significant differences in HbA1c were evident at 6 months (8 trials, 1193 participants; MD -0.22 [95% CI, -0.54 to 0.09],  $I^2=87\%$ ), >6 months after baseline (3 trials, 674 participants; MD -0.10 [95% CI, -0.84 to 0.64],  $I^2=99\%$ ), or when considering the HbA1c available at the point of longest follow-up (13 trials, 1731 participants; MD -0.12 [95% CI, -0.32 to 0.07],  $I^2=56\%$ ) with moderate to high inconsistency across trials at all time-points (**Figure 4**). Subgroup analyses did not reveal important interactions (**Supplemental Table S4**).

## 4. DISCUSSION AND CONCLUSION

### 4.1 Discussion

#### 4.1.1 Summary of findings

We uncovered a nascent body of evidence, small, sparse, and heterogeneous, at moderate risk of bias, reporting favorable effects on social support and short-term HbA1c and no significant effect on quality of life of social network interventions in patients with type 2 diabetes. Although no trial evaluated treatment burden directly, these findings are broadly consistent with our logic model (**Figure 1**) suggesting benefit of interventions to promote social network support in patients with type 2 diabetes.

#### 4.1.2 Comparisons with Previous Studies

To our knowledge, we provide the first meta-analysis of the effects of social network interventions in the management of type 2 diabetes. In concordance with the findings of a previous systematic review on social support in diabetes, studies were highly heterogeneous in their intervention components with limited details reported about these interventions.<sup>36</sup> A recent meta-synthesis of qualitative literature reports that some group-based initiatives use individualistic rather than social approaches.<sup>4</sup> This is reflected in our findings; three out of the eight trials reported the underlying framework for their social network intervention to be based on individualistic theories such as self-efficacy and self-regulation. Similarly, only one intervention employed all aspects of social support identified in diabetes management (**Figure 3**).

#### 4.1.3 Strengths and Limitations of this Review

Our search strategy was designed to balance rigor with feasibility; thus, it may have missed reports which did not mention the social support component of the intervention in the title or abstract. We may have overestimated the risk of bias of these RCTs because of their unclear reporting of trial methods.<sup>37</sup> When seen as a review of an evolving field in its infancy, its

1  
2  
3 limitations apply almost exclusively to the meta-analytical portion of the systematic review: the  
4  
5 heterogeneity of methods and results, while informative, questions the wisdom of pooling. We  
6  
7 could not assess for publication bias; our results could represent an overly sanguine view of the  
8  
9 possibilities associated with social network interventions.  
10  
11

12  
13 Conversely, our review has several strengths, such as a thorough search and reproducible  
14  
15 judgments about inclusion, and network and intervention classifications. Pooling was followed  
16  
17 by a parsimonious set of exploratory pre-specified subgroup analyses to explore inconsistency in  
18  
19 results across RCTs. Overall, we are confident we represent here the emerging body of evidence  
20  
21 about interventions directed at social networks in support of patients with type 2 diabetes.  
22  
23

#### 24 ***4.2 Implications for Research and Practice***

25  
26  
27 Future research should clearly identify and report the explanatory frameworks,  
28  
29 mechanisms, and theories for the social network interventions being tested. Ideally, the theory  
30  
31 should be social and predict the impact of social network interventions on care and outcomes.  
32  
33

34  
35 A recent meta-analysis reported decreased mortality in persons with higher social  
36  
37 support.<sup>38</sup> Studies in patients with diabetes<sup>39</sup> and older adults<sup>40</sup> have found social support to be  
38  
39 predictive of morbidity and mortality, after adjusting for differences in health behaviors.  
40  
41 Proposed mechanisms for the protective effects include modulation of physiologic stress  
42  
43 responses.<sup>41-43</sup> Emerging literature also highlights network composition (type and number  
44  
45 relationships rather than quality of relationships) as important for health and self-management.<sup>40</sup>  
46  
47  
48 <sup>44</sup> Social networks can affect diabetes self-management by impacting the workload patients must  
49  
50 enact by providing opportunities to share knowledge and by facilitating access to resources.<sup>7</sup> In  
51  
52 turn, access to these networks requires patients to work to be aware and to deal with network  
53  
54 relationships.<sup>7</sup> The effects on workload are likely to interact with the theory of physiological  
55  
56  
57  
58  
59  
60



1  
2  
3 stress modulation, as access to healthcare and changes in self-efficacy affect psychosocial stress.  
4  
5 This is especially pertinent for people with limited access to formal health care; they may be  
6  
7 more likely to present to care with higher allostatic load and to depend critically on personal  
8  
9 social networks.<sup>47</sup> Therefore, the effects of involving social networks in diabetes management on  
10  
11 intermediate outcomes such as *allostatic load*, treatment workload and treatment burden should  
12  
13 be tested in future randomized trials to uncover the impact of social support on these and on  
14  
15 health outcomes apparent in observational studies.  
16  
17  
18

19  
20 Although it may be premature to translate this evidence into practice, the preceding  
21  
22 observational and qualitative research and the evolving experimental research summarized here  
23  
24 suggest an important but underexploited role for social networks in supporting the work patients  
25  
26 do to manage type 2 diabetes. Care approaches that consider social networks as targets of  
27  
28 interventions, as mediators of knowledge and access to resources and which help patients to deal  
29  
30 with network relationships may prove more valuable than interventions supporting self-  
31  
32 management alone. Such promise awaits further development and evaluation.  
33  
34  
35

### 36 **4.3 Conclusion**

37  
38 Despite a compelling theoretical base, researchers have barely studied the value of  
39  
40 interventions targeting patient social networks on diabetes care. Although the body of evidence  
41  
42 to date is limited, and based on individualistic theories, the results are promising. This review  
43  
44 challenges the scientific community to design and test theory-based interventions that go beyond  
45  
46 self-management approaches to focus on the largely untapped potential of social networks to  
47  
48 improve diabetes care.  
49  
50  
51  
52  
53  
54  
55  
56  
57  
58  
59  
60

1  
2  
3  
4  
5  
6  
7  
8  
9  
10  
11  
12  
13  
14  
15  
16  
17  
18  
19  
20  
21  
22  
23  
24  
25  
26  
27  
28  
29  
30  
31  
32  
33  
34  
35  
36  
37  
38  
39  
40  
41  
42  
43  
44  
45  
46  
47  
48  
49  
50  
51  
52  
53  
54  
55  
56  
57  
58  
59  
60

For peer review only

1  
2  
3 **Funding:** GS-B was supported by CTSA Grant Number TL1TR000137 from the National  
4  
5 Center for Advancing Translational Science (NCATS) and grant number 3R01HL131535-01S1  
6  
7  
8 from the National Heart Lung and Blood Institute (NHLBI). VMM was partially supported by  
9  
10 Grant Number UL1TR000135 from the National Center for Advancing Translational Science  
11  
12 (NCATS), a component of the National Institutes of Health (NIH). Its contents are solely the  
13  
14 responsibility of the author and do not necessarily represent the official view of the NIH. The  
15  
16 funder had no role in study design, data collection, data analysis, data interpretation, or writing  
17  
18 of the report.  
19  
20  
21

22  
23 **Author contributions:** GS-B, OJP, PJE, RR-G and VMM designed the protocol. GS-B and PJE  
24  
25 searched the literature; GS-B, OJP, and RR-G extracted the data. GS-B, NA-V and VMM  
26  
27 analyzed the data. GS-B, OJP, RR-G, NA-V, PJE, LL-M, AR and VMM interpreted the data  
28  
29 and critically revised the report.  
30  
31  
32

33 **Conflicts of Interest Disclosure:** No competing financial interests exist.  
34  
35

36 **Availability of data and material:** Datasets used and/or analyzed during the current study  
37  
38 available from the corresponding author on reasonable request.  
39  
40  
41  
42  
43  
44  
45  
46  
47  
48  
49  
50  
51  
52  
53  
54  
55  
56  
57  
58  
59  
60

1  
2  
3  
4  
5  
6  
7  
8  
9  
10  
11  
12  
13  
14  
15  
16  
17  
18  
19  
20  
21  
22  
23  
24  
25  
26  
27  
28  
29  
30  
31  
32  
33  
34  
35  
36  
37  
38  
39  
40  
41  
42  
43  
44  
45  
46  
47  
48  
49  
50  
51  
52  
53  
54  
55  
56  
57  
58  
59  
60  
**REFERENCES**

1. Shippee ND, Shah ND, May CR, et al. Cumulative complexity: a functional, patient-centered model of patient complexity can improve research and practice. *Journal of Clinical Epidemiology* 2012;65(10):1041-51. doi: <http://dx.doi.org/10.1016/j.jclinepi.2012.05.005>
2. Eton DT, Yost KJ, Lai JS, et al. Development and validation of the Patient Experience with Treatment and Self-management (PETS): a patient-reported measure of treatment burden. *Qual Life Res* 2016 doi: 10.1007/s11136-016-1397-0
3. Ong BN, Rogers A, Kennedy A, et al. Behaviour change and social blinkers? The role of sociology in trials of self-management behaviour in chronic conditions. *Sociol Health Illn* 2014;36(2):226-38. doi: 10.1111/1467-9566.12113
4. Foss C, Knutsen I, Kennedy A, et al. Connectivity, contest and the ties of self-management support for type 2 diabetes: a meta-synthesis of qualitative literature. *Health Soc Care Community* 2015 doi: 10.1111/hsc.12272 [published Online First: 2015/10/03]
5. Soto SC, Louie SY, Cherrington AL, et al. An ecological perspective on diabetes self-care support, self-management behaviors, and hemoglobin A1C among Latinos. *Diabetes Educ* 2015;41(2):214-23. doi: 10.1177/0145721715569078 [published Online First: 2015/02/07]
6. Strom JL, Egede LE. The Impact of Social Support on Outcomes in Adult Patients with Type 2 Diabetes: A Systematic Review. *Curr Diab Rep* 2012;12(6):769-81. doi: 10.1007/s11892-012-0317-0
7. Vassilev I, Rogers A, Kennedy A, et al. The influence of social networks on self-management support: a metasynthesis. *BMC Public Health* 2014;14:719. doi: 10.1186/1471-2458-14-719 [published Online First: 2014/07/16]

- 1  
2  
3  
4 8. Swartz MK. The PRISMA statement: a guideline for systematic reviews and meta-analyses. *J*  
5  
6 *Pediatr Health Care* 2011;25(1):1-2. doi: 10.1016/j.pedhc.2010.09.006 [published Online  
7  
8 First: 2010/12/15]  
9
- 10 9. Spencer Bonilla G, Rodriguez-Gutierrez R, Ponce O, et al. Social network interventions in the  
11  
12 management of type 2 diabetes: a systematic review and meta-analysis of randomized  
13  
14 trials. PROSPERO 2016:CRD42016036117 Available from  
15  
16 [http://www.crd.york.ac.uk/PROSPERO/display\\_record.asp?ID=CRD42016036117](http://www.crd.york.ac.uk/PROSPERO/display_record.asp?ID=CRD42016036117).  
17  
18  
19
- 20 10. Rogers A, Vassilev I, Sanders C, et al. Social networks, work and network-based resources  
21  
22 for the management of long-term conditions: a framework and study protocol for  
23  
24 developing self-care support. *Implement Sci* 2011;6:56. doi: 10.1186/1748-5908-6-56  
25  
26 [published Online First: 2011/05/31]  
27  
28
- 29 11. Hogan BE, Linden W, Najarian B. Social support interventions: do they work? *Clin Psychol*  
30  
31 *Rev* 2002;22(3):383-442. [published Online First: 2007/01/05]  
32  
33
- 34 12. McGinn T, Wyer PC, Newman TB, et al. Tips for learners of evidence-based medicine: 3.  
35  
36 Measures of observer variability (kappa statistic). *Cmaj* 2004;171(11):1369-73. doi:  
37  
38 10.1503/cmaj.1031981 [published Online First: 2004/11/24]  
39  
40
- 41 13. Kamath CC, Vickers KS, Ehrlich A, et al. Clinical review: behavioral interventions to  
42  
43 prevent childhood obesity: a systematic review and metaanalyses of randomized trials. *J*  
44  
45 *Clin Endocrinol Metab* 2008;93(12):4606-15. doi: 10.1210/jc.2006-2411 [published  
46  
47 Online First: 2008/09/11]  
48  
49
- 50 14. Higgins JP, Altman DG, Gotzsche PC, et al. The Cochrane Collaboration's tool for assessing  
51  
52 risk of bias in randomised trials. *BMJ* 2011;343:d5928. doi: 10.1136/bmj.d5928  
53  
54  
55 [published Online First: 2011/10/20]  
56  
57  
58  
59  
60

- 1  
2  
3  
4  
5  
6  
7  
8  
9  
10  
11  
12  
13  
14  
15  
16  
17  
18  
19  
20  
21  
22  
23  
24  
25  
26  
27  
28  
29  
30  
31  
32  
33  
34  
35  
36  
37  
38  
39  
40  
41  
42  
43  
44  
45  
46  
47  
48  
49  
50  
51  
52  
53  
54  
55  
56  
57  
58  
59  
60
15. Pawson R, Greenhalgh T, Harvey G, et al. Realist review--a new method of systematic review designed for complex policy interventions. *J Health Serv Res Policy* 2005;10 Suppl 1:21-34. doi: 10.1258/1355819054308530 [published Online First: 2005/08/02]
  16. Guyatt G, Oxman AD, Sultan S, et al. GRADE guidelines: 11. Making an overall rating of confidence in effect estimates for a single outcome and for all outcomes. *Journal of clinical epidemiology* 2013;66(2):151-7. doi: 10.1016/j.jclinepi.2012.01.006 [published Online First: 2012/05/01]
  17. Review Manager (RevMan) [Computer program] . Version 5.3. *Copenhagen: The Nordic Cochrane Centre* 2014(The Cochrane Collaboration)
  18. Cohen J. *Statistical Power Analysis for the Behavioral Sciences*. Hillsdale, NJ; Erlbaum 1988;Second Edition
  19. Higgins JP, Thompson SG, Deeks JJ, et al. Measuring inconsistency in meta-analyses. *BMJ* 2003;327(7414):557-60. doi: 10.1136/bmj.327.7414.557 [published Online First: 2003/09/06]
  20. Wing RR, Marcus MD, Epstein LH, et al. A "family-based" approach to the treatment of obese type II diabetic patients. *J Consult Clin Psychol* 1991;59(1):156-62. [published Online First: 1991/02/01]
  21. Brown SA, Garcia AA, Kouzekanani K, et al. Culturally competent diabetes self-management education for Mexican Americans: the Starr County border health initiative. *Diabetes Care* 2002;25(2):259-68. [published Online First: 2002/01/30]
  22. Kang CM, Chang SC, Chen PL, et al. Comparison of family partnership intervention care vs. conventional care in adult patients with poorly controlled type 2 diabetes in a community

- 1  
2  
3 hospital: a randomized controlled trial. *Int J Nurs Stud* 2010;47(11):1363-73. doi:  
4  
5 <http://dx.doi.org/10.1016/j.ijnurstu.2010.03.009>  
6  
7  
8 23. Keogh KM, Smith SM, White P, et al. Psychological family intervention for poorly  
9  
10 controlled type 2 diabetes. *American Journal of Managed Care* 2011;17(2):105-13.  
11  
12 24. Trief P, Sandberg JG, Ploutz-Snyder R, et al. Promoting couples collaboration in type 2  
13  
14 diabetes: the diabetes support project pilot data. *Fam Syst Health* 2011;29(3):253-61. doi:  
15  
16 <http://dx.doi.org/10.1037/a0024564>  
17  
18  
19 25. Toobert DJ, Strycker LA, King DK, et al. Long-term outcomes from a multiple-risk-factor  
20  
21 diabetes trial for Latinas: Viva Bien! *Translational Behavioral Medicine* 2011;1(3):416-  
22  
23 26. doi: <http://dx.doi.org/10.1007/s13142-010-0011-1>  
24  
25  
26 26. Haltiwanger EP, Brutus H. A Culturally Sensitive Diabetes Peer Support for Older Mexican-  
27  
28 Americans. *Occupational Therapy International* 2012;19(2):67-75 9p. doi:  
29  
30 10.1002/oti.320  
31  
32  
33 27. Shaya FT, Chirikov VV, Howard D, et al. Effect of social networks intervention in type 2  
34  
35 diabetes: a partial randomised study. *Journal of Epidemiology & Community Health*  
36  
37 2014;68(4):326-32. doi: <http://dx.doi.org/10.1136/jech-2013-203274>  
38  
39  
40 28. Sorkin DH, Mavandadi S, Rook KS, et al. Dyadic collaboration in shared health behavior  
41  
42 change: the effects of a randomized trial to test a lifestyle intervention for high-risk  
43  
44 Latinas. *Health Psychology* 2014;33(6):566-75. doi:  
45  
46 <http://dx.doi.org/10.1037/hea0000063>  
47  
48  
49 29. Khosravizade Tabasi H, Madarshahian F, Khoshniat Nikoo M, et al. Impact of family  
50  
51 support improvement behaviors on anti diabetic medication adherence and cognition in  
52  
53  
54  
55  
56  
57  
58  
59  
60

- 1  
2  
3 type 2 diabetic patients. *J* 2014;13(1):113. doi: [http://dx.doi.org/10.1186/s40200-014-](http://dx.doi.org/10.1186/s40200-014-0113-2)  
4  
5 [0113-2](http://dx.doi.org/10.1186/s40200-014-0113-2)  
6  
7  
8 30. Kasteleyn MJ, Vos RC, Rutten GEH. Tailored support for type 2 diabetes patients with a first  
9 acute coronary event after discharge from hospital: Results of a RCT in primary care.  
10  
11 *Diabetologia* 2014;1):S442. doi: <http://dx.doi.org/10.1007/s00125-014-3355-0>  
12  
13  
14  
15 31. Trief PM, Fisher L, Sandberg J, et al. A couples intervention for type 2 diabetes: Diabetes  
16 support project. *Diabetes* 2015;64(5):A215.  
17  
18  
19  
20 32. Greene N, Eaton S, Hoag J. Effect of family-focused dsme on physiological outcomes in  
21 african americans with type 2 diabetes. *Diabetes* 2015;64(5):A54.  
22  
23  
24  
25 33. Pearce KAL, M. M.;Shelton, B. J.;Schoenberg, N. E.;Williamson, M. A.;Barron, M.  
26 A.;Houlihan, J. M.;Kentucky Ambulatory, Network. Cardiovascular risk education and  
27 social support (CaRESS): report of a randomized controlled trial from the Kentucky  
28 Ambulatory Network (KAN). *J Am Board Fam Med* 2008;21(4):269-81. doi:  
29  
30  
31  
32  
33  
34 <http://dx.doi.org/10.3122/jabfm.2008.04.080007>  
35  
36  
37 34. Samuel-Hodge CD, Keyserling TC, Park S, et al. A randomized trial of a church-based  
38 diabetes self-management program for African Americans with type 2 diabetes. *Diabetes*  
39  
40  
41  
42  
43  
44  
45 35. Pearce KA, Love MM, Shelton BJ, et al. Cardiovascular risk education and social support  
46 (CaRESS): report of a randomized controlled trial from the Kentucky Ambulatory  
47 Network (KAN). *J Am Board Fam Med* 2008;21(4):269-81. doi:  
48  
49  
50  
51  
52  
53  
54  
55  
56  
57  
58  
59  
60



- 1  
2  
3  
4  
5  
6  
7  
8  
9  
10  
11  
12  
13  
14  
15  
16  
17  
18  
19  
20  
21  
22  
23  
24  
25  
26  
27  
28  
29  
30  
31  
32  
33  
34  
35  
36  
37  
38  
39  
40  
41  
42  
43  
44  
45  
46  
47  
48  
49  
50  
51  
52  
53  
54  
55  
56  
57  
58  
59  
60
36. van Dam HA, van der Horst FG, Knoops L, et al. Social support in diabetes: a systematic review of controlled intervention studies. *Patient Educ Couns* 2005;59(1):1-12. doi: 10.1016/j.pec.2004.11.001 [published Online First: 2005/10/04]
37. Devereaux PJ, Choi PT, El-Dika S, et al. An observational study found that authors of randomized controlled trials frequently use concealment of randomization and blinding, despite the failure to report these methods. *Journal of clinical epidemiology* 2004;57(12):1232-6. doi: 10.1016/j.jclinepi.2004.03.017 [published Online First: 2004/12/25]
38. Shor E, Roelfs DJ, Yogev T. The strength of family ties: A meta-analysis and meta-regression of self-reported social support and mortality. *Social Networks* 2013;35(4):626-38. doi: <http://dx.doi.org/10.1016/j.socnet.2013.08.004>
39. Zhang XP, Norris SL, Gregg EW, et al. Social support and mortality among older persons with diabetes. *Diabetes Educator* 2007;33(2):273-81. doi: 10.1177/0145721707299265
40. Ellwardt L, van Tilburg T, Aartsen M, et al. Personal networks and mortality risk in older adults: a twenty-year longitudinal study. *PLoS One* 2015;10(3):e0116731. doi: 10.1371/journal.pone.0116731
41. Steptoe A, Owen N, Kunz-Ebrecht SR, et al. Loneliness and neuroendocrine, cardiovascular, and inflammatory stress responses in middle-aged men and women. *Psychoneuroendocrinology* 2004;29(5):593-611. doi: 10.1016/S0306-4530(03)00086-6
42. Steptoe A, Hackett RA, Lazzarino AI, et al. Disruption of multisystem responses to stress in type 2 diabetes: investigating the dynamics of allostatic load. *Proc Natl Acad Sci U S A* 2014;111(44):15693-8. doi: 10.1073/pnas.1410401111 [published Online First: 2014/10/22]

1  
2  
3 43. Marmot M, Wilkinson R. Social determinants of health: Oxford University Press 2005.  
4

5 44. Vassilev I, Rogers A, Kennedy A, et al. Social Network Type and Long-Term Condition  
6

7  
8 Management Support: A Cross-Sectional Study in Six European Countries. *PLoS One*  
9

10 2016;11(8):e0161027. doi: 10.1371/journal.pone.0161027  
11  
12  
13  
14  
15  
16  
17  
18  
19  
20  
21  
22  
23  
24  
25  
26  
27  
28  
29  
30  
31  
32  
33  
34  
35  
36  
37  
38  
39  
40  
41  
42  
43  
44  
45  
46  
47  
48  
49  
50  
51  
52  
53  
54  
55  
56  
57  
58  
59  
60

For peer review only

1  
2  
3  
4  
5  
6  
7  
8  
9  
10  
11  
12  
13  
14  
15  
16  
17  
18  
19  
20  
21  
22  
23  
24  
25  
26  
27  
28  
29  
30  
31  
32  
33  
34  
35  
36  
37  
38  
39  
40  
41  
42  
43  
44  
45  
46  
47  
48  
49  
50  
51  
52  
53  
54  
55  
56  
57  
58  
59  
60

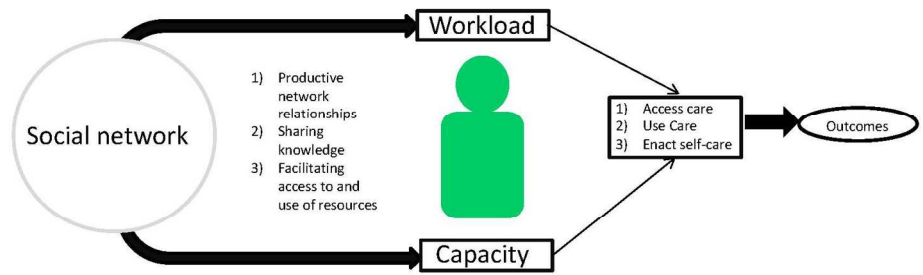

Figure 1. Logic Model of Social Self-management

Figure 1. Logic Model of Social Self-management

234x118mm (200 x 200 DPI)

review only

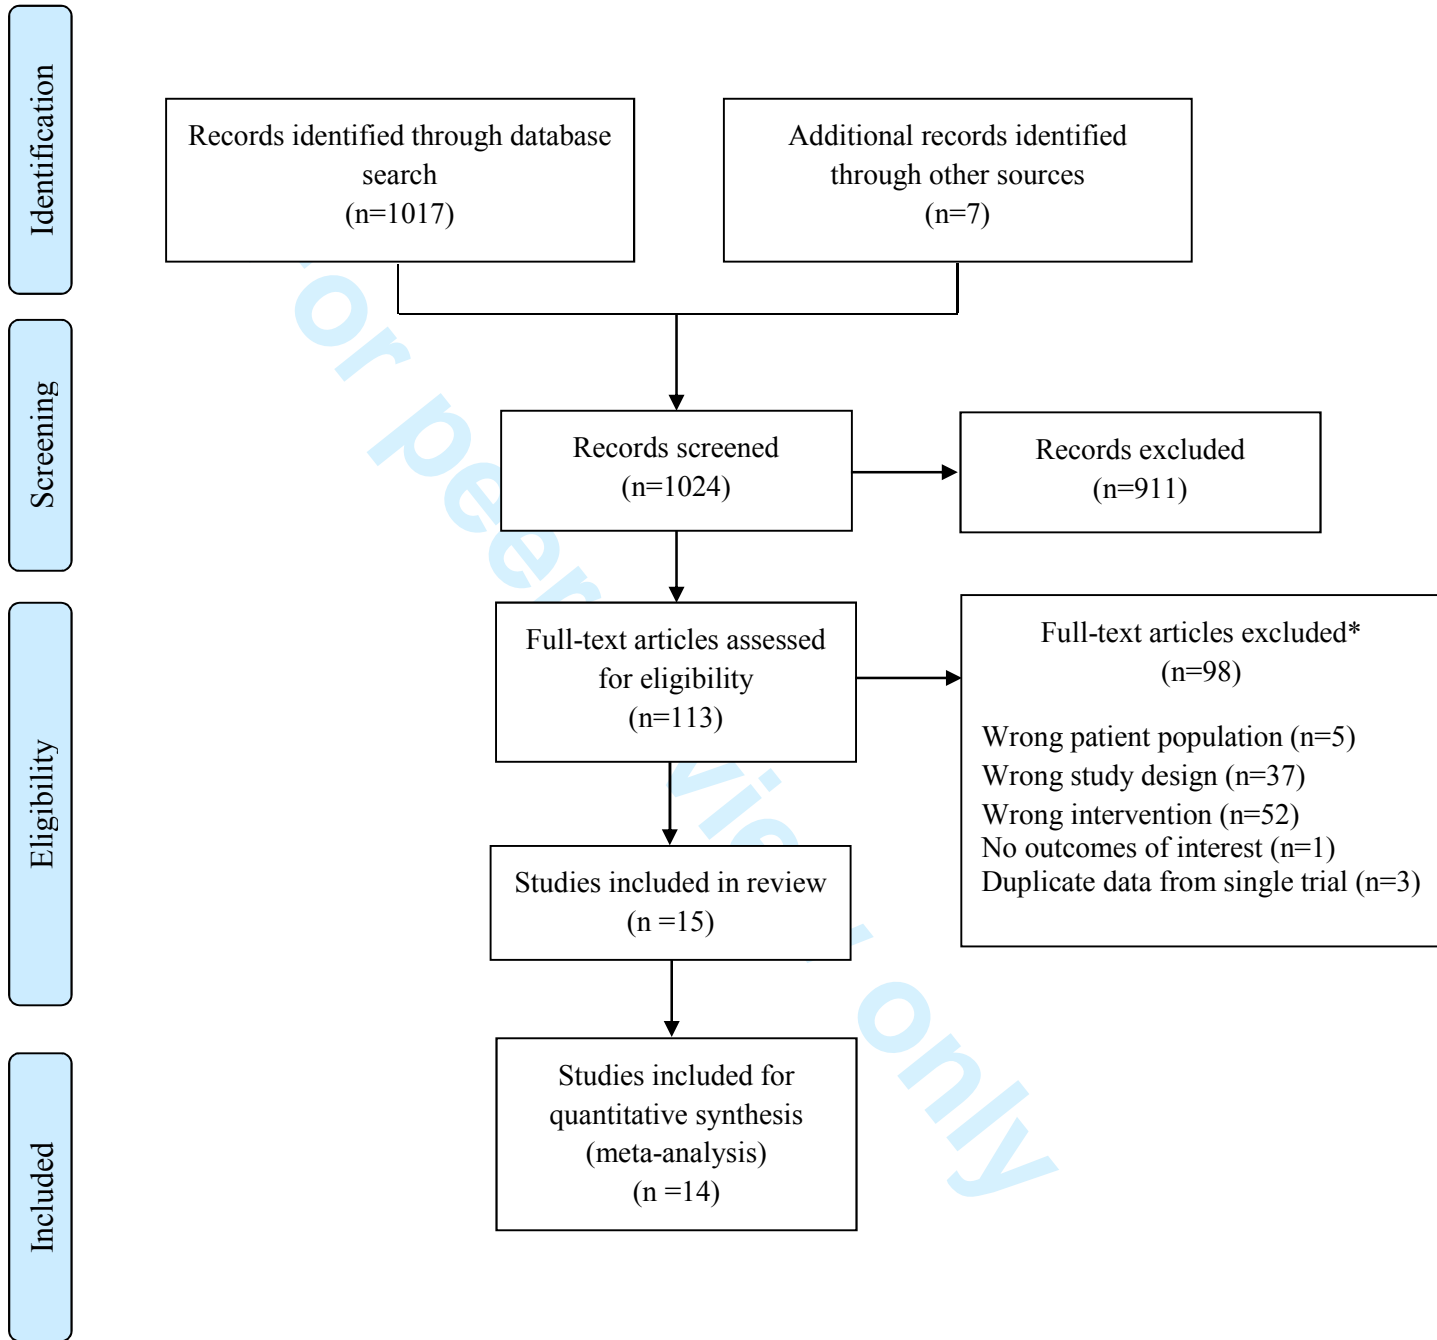

Figure 1. PRISMA flow chart  
\*reasons not mutually exclusive

1  
2  
3  
4  
5  
6  
7  
8  
9  
10  
11  
12  
13  
14  
15  
16  
17  
18  
19  
20  
21  
22  
23  
24  
25  
26  
27  
28  
29  
30  
31  
32  
33  
34  
35  
36  
37  
38  
39  
40  
41  
42  
43  
44  
45  
46  
47  
48  
49  
50  
51  
52  
53  
54  
55  
56  
57  
58  
59  
60

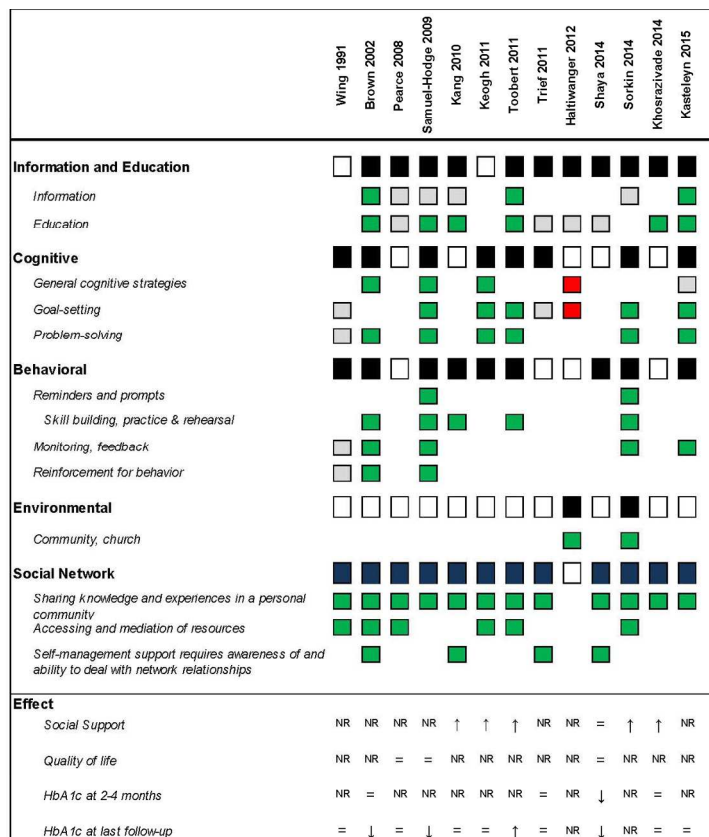

Figure 1. Intervention and comparator components. NR: not reported, ↑: higher in social network arm, ↓: lower in social network arm, =: no significant difference between arms. Abstracts not included.

|   |                                                                                  |
|---|----------------------------------------------------------------------------------|
| ■ | Active components (present in intervention arm and absent from comparator arm)   |
| □ | Components present in both arms                                                  |
| ■ | Negative components (present in comparator arm and absent from intervention arm) |

Figure 3. Intervention and comparator components

215x279mm (200 x 200 DPI)

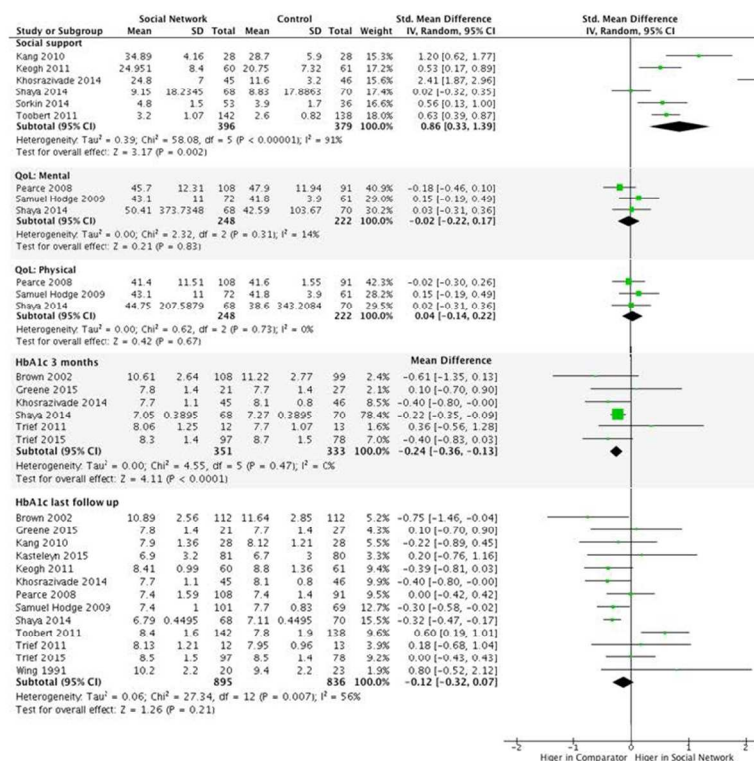

Figure 4. Effect of social network interventions on social support, quality of life (QoL) and HbA1c

Figure 4. Effect of social network interventions on social support, quality of life (QoL) and HbA1c

215x279mm (110 x 110 DPI)

1  
2  
3  
4  
5  
6  
7  
8  
9  
10  
11  
12  
13  
14  
15  
16  
17  
18  
19  
20  
21  
22  
23  
24  
25  
26  
27  
28  
29  
30  
31  
32  
33  
34  
35  
36  
37  
38  
39  
40  
41  
42  
43  
44  
45  
46  
47  
48  
49  
50  
51  
52  
53  
54  
55  
56  
57  
58  
59  
60

For peer review only

**Supplemental Material**

**It takes a village: a systematic review of social network interventions in patients with type 2 diabetes**

| Study               | Notable inclusion criteria                                                                | Underlying framework                              | Support network involved             | Intervention deliverer(s)                               | Setting where intervention was delivered | Length (months) | Intervention contact time (minutes) |
|---------------------|-------------------------------------------------------------------------------------------|---------------------------------------------------|--------------------------------------|---------------------------------------------------------|------------------------------------------|-----------------|-------------------------------------|
| Wing 1991           | >20% above ideal above weight                                                             | Behavioral marital therapy                        | Spouse                               | Staff and physicians                                    | NR                                       | 5               | 960                                 |
| Brown 2002          | None                                                                                      | NR                                                | Close family member or close friend  | Clinicians and community health workers                 | Community                                | 12              | 120                                 |
| Pearce 2008         | A1C>8%                                                                                    | Health belief model                               | Relative or friend                   | Nurse practitioner educator                             | Community                                | 12              | NR                                  |
| Samuel - Hodge 2009 | No history of ketoacidosis                                                                | Behavior change and adult education               | Church community                     | Church diabetes advisor (CDA) and a health professional | Community                                | 12              | 1140-1500                           |
| Kang 2010           | At least two of last three A1C reading $\geq 7\%$ ; used oral antidiabetic agents only    | NR                                                | Household family member              | Clinicians and social workers                           | Community                                | 6               | 450                                 |
| Keogh 2011          | 2 out of 3 LAST A1Cs $> 8\%$                                                              | Self-regulation of health and illness             | Family member                        | Psychologist                                            | Home                                     | 0.75            | 100                                 |
| Toobert 2011        | Latinas                                                                                   | NR                                                | Family members                       | Group leader                                            | Community                                | NR              | NR                                  |
| Trief 2011          | Married for $> 1$ year; A1C $> 7.3\%$                                                     | Social learning theory                            | Spouse/Partner                       | Diabetes educator and marriage/family therapist         | Telephone                                | 3               | NR                                  |
| Haltiwanger 2012    | $> 60$ years old; Mexican American; documented difficulties with health habits            | NR                                                | Spouse                               | Health educator                                         | NR                                       | 2               | 720                                 |
| Khosravizade 2014   | $> 30$ years old; medium or low adherence; low social support                             | NR                                                | Household family member              | Researchers                                             | NR                                       | 3               | NR                                  |
| Shaya 2014          | A1C $> 7\%$ or FBS $> 110$ mg/dl                                                          | Education and medication therapy management       | Peers                                | Nurse practitioner educator                             | Community                                | 6               | NR                                  |
| Sorkin 2014         | Latina; mother to overweight woman                                                        | Lifestyle changes                                 | Daughter                             | Lifestyle community coach                               | Community                                | 4               | NR                                  |
| Greene 2015         | African American                                                                          | NR                                                | Household family member or companion | Unclear                                                 | NR                                       | 2               | 3120                                |
| Kasteleyn 2015      | $> 35$ years old; within 2 weeks from hospital discharge after first acute coronary event | Self-efficacy                                     | Spouse/Partner                       | Diabetes Nurse practitioner                             | Home                                     | 2               | 155                                 |
| Trief 2015          | Married or with partner for $> 1$ year; A1C $> 7.5\%$                                     | Interdependence theory and social learning theory | Spouse/Partner                       | Diabetes educator or counselor                          | Telephone                                | 3               | 720                                 |

Supplemental Table S1. Trial characteristics



| Study                | Intervention |                        |                                     | Control |                        |                                     |
|----------------------|--------------|------------------------|-------------------------------------|---------|------------------------|-------------------------------------|
|                      | N            | Mean Age in years (SD) | Mean duration of T2DM in years (SD) | N       | Mean Age in years (SD) | Mean duration of T2DM in years (SD) |
| Wing 1991            | 25           | 53.6 (7.7)             | NR                                  | 24      | 51.2 (7.3)             | NR                                  |
| Brown 2002           | 128          | 54.7 (8.2)             | 7.6 (5.8)                           | 128     | 53.3 (8.3)             | 8.1 (6.9)                           |
| Sammuel - Hodge 2002 | 117          | 57 (9.7)               | 9 (NR)                              | 84      | 61.3 (11.9)            | 11 (NR)                             |
| Pearce 2008          | 108          | 61.2 (10.59)           | NR                                  | 91      | 63.1 (8.63)            | NR                                  |
| Kang 2010            | 33           | 55.3 (7.7)             | 3.8 (3.2)                           | 34      | 51.7 (8.5)             | 4.4 (3)                             |
| Toobert 2011         | 142          | 55.6 (9.7)             | 8.4 (6.5)                           | 138     | 58.7 (10.3)            | 10.4 (9.8)                          |
| Greene 2015          | 21           | NR                     | NR                                  | 27      | NR                     | NR                                  |
| Keogh 2011           | 60           | 59.96 (11.67)          | 9.17 (7.1)                          | 61      | 57.9 (11.34)           | 9.65 (6.45)                         |
| Trief 2011           | 12           | 60.33 (8.63)           | 8.63 (NR)                           | 12      | 61.08 (9.27)           | 9.27 (NR)                           |
| Haltiwanger 2012     | 12           | NR                     | NR                                  | 36      | NR                     | NR                                  |
| Khosravizade 2014    | 45           | 52.93 (7.62)           | 9.71 (6.75)                         | 46      | 54.13 (7.56)           | 11.39 (5.4)                         |
| Shaya 2014           | 68           | 53.9 (NR)              | 9.2 (8.6)                           | 70      | 51.9 (NR)              | 8.8 (8.2)                           |
| Sorkin 2014          | 53           | 52.7 (6.9)             | 9.8 (NR)                            | 36      | 52.7 (6.9)             | 9.8 (NR)                            |
| Kasteleyn 2015       | 101          | 66 (9.3)               | 7.0 (2.8-16)                        | 100     | 65.6 (9.4)             | 8.5 (5-15)                          |
| Trief 2015           | 97           | 57.8 (10.8)            | 12.8 (NR)                           | 78      | 56.9 (10.4)            | 12.6 (NR)                           |

Supplemental Table S1. Trial participant baseline characteristics

|                   | Random sequence generation (selection bias) | Allocation concealment (selection bias) | Blinding of participants and personnel (performance bias) | Blinding of outcome assessment (detection bias) | Incomplete outcome data (attrition bias) | Selective reporting (reporting bias) | Other bias |
|-------------------|---------------------------------------------|-----------------------------------------|-----------------------------------------------------------|-------------------------------------------------|------------------------------------------|--------------------------------------|------------|
| Brown 2002        | ?                                           | ?                                       | -                                                         | +                                               | +                                        | +                                    | +          |
| Greene 2015       | ?                                           | ?                                       | -                                                         | ?                                               | ?                                        | ?                                    | ?          |
| Haltiwanger 2012  | +                                           | ?                                       | -                                                         | ?                                               | -                                        | -                                    | +          |
| Kang 2010         | +                                           | ?                                       | -                                                         | ?                                               | +                                        | +                                    | +          |
| Kasteleyn 2014    | +                                           | ?                                       | -                                                         | ?                                               | +                                        | +                                    | ?          |
| Keogh 2011        | +                                           | +                                       | -                                                         | +                                               | +                                        | -                                    | ?          |
| Khosrazivade 2014 | ?                                           | ?                                       | -                                                         | ?                                               | +                                        | ?                                    | ?          |
| Pearce 2008       | +                                           | +                                       | -                                                         | ?                                               | ?                                        | -                                    | +          |
| Samuel Hodge 2009 | +                                           | +                                       | -                                                         | +                                               | -                                        | +                                    | +          |
| Shaya 2014        | -                                           | ?                                       | -                                                         | ?                                               | -                                        | +                                    | ?          |
| Sorkin 2014       | +                                           | +                                       | -                                                         | ?                                               | +                                        | +                                    | +          |
| Toobert 2011      | ?                                           | +                                       | -                                                         | +                                               | +                                        | +                                    | +          |
| Trief 2011        | ?                                           | ?                                       | -                                                         | +                                               | -                                        | +                                    | -          |
| Trief 2015        | +                                           | +                                       | -                                                         | +                                               | -                                        | -                                    | -          |
| Wing 1991         | ?                                           | ?                                       | -                                                         | ?                                               | +                                        | ?                                    | ?          |

Supplemental Figure S1. Risk of bias of included trials (Cochrane risk of bias tool)

Assessing confidence in the estimates of effect:  
GRADE

| Quality assessment        |                   |                      |                        |              |                      |                      | N <sup>o</sup> of patients   |                | Effect                                                 | Quality         | Importance |
|---------------------------|-------------------|----------------------|------------------------|--------------|----------------------|----------------------|------------------------------|----------------|--------------------------------------------------------|-----------------|------------|
| N <sup>o</sup> of studies | Study design      | Risk of bias         | Inconsistency          | Indirectness | Imprecision          | Other considerations | Social network interventions | Any comparator | Absolute (95% CI)                                      |                 |            |
| Social Support            |                   |                      |                        |              |                      |                      |                              |                |                                                        |                 |            |
| 6                         | randomised trials | serious <sub>1</sub> | serious <sup>2,3</sup> | not serious  | Serious <sub>4</sub> | strong association   | 396                          | 379            | SMD <b>0.86 higher</b><br>(0.33 higher to 1.39 higher) | Low to moderate | IMPORTANT  |

CI: Confidence interval; SMD: Standardised mean difference

1. unclear blinding of outcome assessors
2. I<sup>2</sup>=91%
3. non-overlapping CIs
4. confidence interval or estimate effect includes non-important change as well as very important change

| Quality assessment        |                   |                      |                      |              |             |                      | N <sup>o</sup> of patients   |                | Effect                                              | Quality         | Importance |
|---------------------------|-------------------|----------------------|----------------------|--------------|-------------|----------------------|------------------------------|----------------|-----------------------------------------------------|-----------------|------------|
| N <sup>o</sup> of studies | Study design      | Risk of bias         | Inconsistency        | Indirectness | Imprecision | Other considerations | Social network interventions | Any comparator | Absolute (95% CI)                                   |                 |            |
| A1C 2-4 months            |                   |                      |                      |              |             |                      |                              |                |                                                     |                 |            |
| 6                         | randomised trials | serious <sub>1</sub> | not serious          | not serious  | not serious | None                 | 351                          | 333            | MD <b>0.24 lower</b><br>(0.36 lower to 0.13 lower)  | Low to very low | IMPORTANT  |
| A1C 5-7 Months            |                   |                      |                      |              |             |                      |                              |                |                                                     |                 |            |
| 8                         | randomised trials | serious <sub>1</sub> | serious <sup>2</sup> | not serious  | not serious | None                 | 608                          | 585            | MD <b>0.22 lower</b><br>(0.54 lower to 0.09 higher) | Low to very low | IMPORTANT  |
| A1C 8+ months             |                   |                      |                      |              |             |                      |                              |                |                                                     |                 |            |

| Quality assessment        |                   |                      |                           |              |                      |                      | N <sup>o</sup> of patients   |                | Effect                                              | Quality         | Importance |
|---------------------------|-------------------|----------------------|---------------------------|--------------|----------------------|----------------------|------------------------------|----------------|-----------------------------------------------------|-----------------|------------|
| N <sup>o</sup> of studies | Study design      | Risk of bias         | Inconsistency             | Indirectness | Imprecision          | Other considerations | Social network interventions | Any comparator | Absolute (95% CI)                                   |                 |            |
| 3                         | randomised trials | serious <sub>1</sub> | very serious <sup>2</sup> | not serious  | serious <sup>3</sup> | None                 | 355                          | 319            | MD <b>0.1 lower</b><br>(0.84 lower to 0.65 higher)  | Low to very low | IMPORTANT  |
| Last AIC                  |                   |                      |                           |              |                      |                      |                              |                |                                                     |                 |            |
| 13                        | randomised trials | serious <sub>1</sub> | not serious               | not serious  | not serious          | None                 | 895                          | 836            | MD <b>0.12 lower</b><br>(0.32 lower to 0.07 higher) | Low to very low | IMPORTANT  |

CI: Confidence interval; MD: Mean difference

1. unclear allocation concealment
2. high I2
3. large CI

| Quality assessment                  |                   |                      |                             |              |                           |                      | N <sup>o</sup> of patients   |                | Effect                                                | Quality         | Importance |
|-------------------------------------|-------------------|----------------------|-----------------------------|--------------|---------------------------|----------------------|------------------------------|----------------|-------------------------------------------------------|-----------------|------------|
| N <sup>o</sup> of studies           | Study design      | Risk of bias         | Inconsistency               | Indirectness | Imprecision               | Other considerations | Social network interventions | Any comparator | Absolute (95% CI)                                     |                 |            |
| Well-being                          |                   |                      |                             |              |                           |                      |                              |                |                                                       |                 |            |
| 2                                   | randomised trials | serious <sub>1</sub> | very serious <sup>2,3</sup> | not serious  | very serious <sup>4</sup> | None                 | 141                          | 141            | SMD <b>0.62 higher</b><br>(0.13 lower to 1.37 higher) | Low to very low | IMPORTANT  |
| Quality of Life: Physical Component |                   |                      |                             |              |                           |                      |                              |                |                                                       |                 |            |
| 3                                   | randomised trials | serious <sub>1</sub> | not serious                 | not serious  | not serious               | None                 | 248                          | 222            | SMD <b>0.04 higher</b><br>(0.14 lower to 0.22 higher) | Low to very low | IMPORTANT  |
| Quality of Life: Mental Component   |                   |                      |                             |              |                           |                      |                              |                |                                                       |                 |            |

| Quality assessment        |                   |                      |               |              |             |                      | N <sup>o</sup> of patients   |                | Effect                                     | Quality         | Importance |
|---------------------------|-------------------|----------------------|---------------|--------------|-------------|----------------------|------------------------------|----------------|--------------------------------------------|-----------------|------------|
| N <sup>o</sup> of studies | Study design      | Risk of bias         | Inconsistency | Indirectness | Imprecision | Other considerations | Social network interventions | Any comparator | Absolute (95% CI)                          |                 |            |
| 2                         | randomised trials | serious <sup>1</sup> | not serious   | not serious  | not serious | None                 | 140                          | 131            | SMD 0.02 lower (0.22 lower to 0.17 higher) | Low to very low | IMPORTANT  |

CI: Confidence interval; SMD: Standardised mean difference

1. unclear allocation concealment
2. high I<sup>2</sup>
3. differences in scales used
4. very wide CI

### Supplemental Table S3. GRADE assessment

| <b>Subgroup Analyses</b>            |                                                               |                                                                          |                                |                                                               |                                                                          |                                |
|-------------------------------------|---------------------------------------------------------------|--------------------------------------------------------------------------|--------------------------------|---------------------------------------------------------------|--------------------------------------------------------------------------|--------------------------------|
|                                     | <b>Hba1c at last follow-up</b>                                |                                                                          |                                | <b>Social support at last follow-up</b>                       |                                                                          |                                |
|                                     | <b>Subgroup</b><br><i>effect size (95% CI); I<sup>2</sup></i> | <b>Comparison subgroup</b><br><i>effect size (95% CI); I<sup>2</sup></i> | <b>P-value for interaction</b> | <b>Subgroup</b><br><i>effect size (95% CI); I<sup>2</sup></i> | <b>Comparison subgroup</b><br><i>effect size (95% CI); I<sup>2</sup></i> | <b>P-value for interaction</b> |
| <b>Patient characteristics</b>      |                                                               |                                                                          |                                |                                                               |                                                                          |                                |
| Mean baseline HbA1c > 8%            | -0.08 (-0.42, 0.26); 66%                                      | -0.27 (-0.39, -0.15); 0%                                                 | 0.31                           | 1.04 (0.46, 1.61); NA                                         | 0.02 (-0.32, 0.35); 90%                                                  | 0.003                          |
| <b>Intervention characteristics</b> |                                                               |                                                                          |                                |                                                               |                                                                          |                                |
| Self-selected social network        | -0.17 (-0.43, 0.10); 68%                                      | -0.10 (-0.36, 0.17); 14%                                                 | 0.72                           | 0.92 (0.29, 1.56); 93%                                        | 0.56 (0.13, 1.0); NA                                                     | 0.36                           |
| Household member                    | -0.05 (-0.30, 0.21); 53%                                      | -0.32 (-0.45, -0.18); 0%                                                 | 0.07                           | 1.16 (0.44, 1.88); 92%                                        | 0.27 (-0.26, 0.81); 74%                                                  | 0.05                           |
| Contact time >840 minutes           | 0.27 (-0.05, 0.58); 73%                                       | -0.23 (-0.43, -0.03); 0%                                                 | 0.009                          | 1.04 (0.19, 1.88); 95%                                        | 1.16 (0.44, 1.88); na                                                    | 0.28                           |
| Underlying framework                | -0.22 (-0.36, -0.07); 16%                                     | -0.11 (-0.63, 0.4); 76%                                                  | 0.7                            | 0.36 (-0.01, 0.72); 65%                                       | 1.39 (0.32, 2.47); 94%                                                   | 0.07                           |
| Dyadic social network reported      | -0.17 (-0.36, 0.02); 9%                                       | -0.04 (-0.49, 0.41); 88%                                                 | 0.61                           | 1.16 (0.34, 1.97); 92%                                        | 0.33 (-0.26, 0.93); 88%                                                  | 0.11                           |
| <b>Trial characteristics</b>        |                                                               |                                                                          |                                |                                                               |                                                                          |                                |
| Low risk of bias                    | -0.10 (-0.47, 0.26); 73%                                      | -0.23 (-0.40, -0.07); 11%                                                | 0.52                           | 0.59 (0.41, 0.77); 0%                                         | 1.20 (-0.27, 2.66); 96%                                                  | 0.42                           |

Supplemental Table S4. Subgroup analyses

## Search Strategy

## Ovid MEDLINE(R) In-Process &amp; Other Non-Indexed Citations and Ovid MEDLINE(R) 1946 to Present

|    |   |                                                                                                                                                                                                                                                                                                |          |
|----|---|------------------------------------------------------------------------------------------------------------------------------------------------------------------------------------------------------------------------------------------------------------------------------------------------|----------|
| 1  |   |                                                                                                                                                                                                                                                                                                |          |
| 2  |   |                                                                                                                                                                                                                                                                                                |          |
| 3  |   |                                                                                                                                                                                                                                                                                                |          |
| 4  |   |                                                                                                                                                                                                                                                                                                |          |
| 5  |   |                                                                                                                                                                                                                                                                                                |          |
| 6  |   |                                                                                                                                                                                                                                                                                                |          |
| 7  | 1 | *diabetes mellitus, type 2/ or "type 2 diabet*".tw. or niddm.mp. or t2dm.mp. [mp=title, abstract, original title, name of substance word, subject heading word, keyword heading word, protocol supplementary concept word, rare disease supplementary concept word, unique identifier]         | 114218   |
| 8  |   |                                                                                                                                                                                                                                                                                                | Advanced |
| 9  |   |                                                                                                                                                                                                                                                                                                |          |
| 10 |   |                                                                                                                                                                                                                                                                                                |          |
| 11 |   |                                                                                                                                                                                                                                                                                                |          |
| 12 |   |                                                                                                                                                                                                                                                                                                |          |
| 13 | 2 | ("social network" or "social support").mp. [mp=title, abstract, original title, name of substance word, subject heading word, keyword heading word, protocol supplementary concept word, rare disease supplementary concept word, unique identifier]                                           | 69042    |
| 14 |   |                                                                                                                                                                                                                                                                                                | Advanced |
| 15 |   |                                                                                                                                                                                                                                                                                                |          |
| 16 |   |                                                                                                                                                                                                                                                                                                |          |
| 17 |   |                                                                                                                                                                                                                                                                                                |          |
| 18 |   |                                                                                                                                                                                                                                                                                                |          |
| 19 | 3 | 1 and 2                                                                                                                                                                                                                                                                                        | 663      |
| 20 |   |                                                                                                                                                                                                                                                                                                | Advanced |
| 21 |   |                                                                                                                                                                                                                                                                                                |          |
| 22 | 4 | family relations/ or family conflict/ or intergenerational relations/ or sibling relations/                                                                                                                                                                                                    | 15431    |
| 23 |   |                                                                                                                                                                                                                                                                                                | Advanced |
| 24 |   |                                                                                                                                                                                                                                                                                                |          |
| 25 | 5 | family/ or adult children/ or family relations/                                                                                                                                                                                                                                                | 73608    |
| 26 |   |                                                                                                                                                                                                                                                                                                | Advanced |
| 27 |   |                                                                                                                                                                                                                                                                                                |          |
| 28 | 6 | family role/ or family therapy/                                                                                                                                                                                                                                                                | 7952     |
| 29 |   |                                                                                                                                                                                                                                                                                                | Advanced |
| 30 |   |                                                                                                                                                                                                                                                                                                |          |
| 31 | 7 | 1 and (4 or 5 or 6)                                                                                                                                                                                                                                                                            | 536      |
| 32 |   |                                                                                                                                                                                                                                                                                                | Advanced |
| 33 |   |                                                                                                                                                                                                                                                                                                |          |
| 34 | 8 | (couple or couples or married or spous* or partner*1 or household or neighbor*1).mp. [mp=title, abstract, original title, name of substance word, subject heading word, keyword heading word, protocol supplementary concept word, rare disease supplementary concept word, unique identifier] | 231588   |
| 35 |   |                                                                                                                                                                                                                                                                                                | Advanced |
| 36 |   |                                                                                                                                                                                                                                                                                                |          |
| 37 |   |                                                                                                                                                                                                                                                                                                |          |
| 38 |   |                                                                                                                                                                                                                                                                                                |          |
| 39 | 9 | (church* or religious* or husband* or wife* or relatives or "family based").mp. [mp=title, abstract, original title, name of substance word, subject heading word, keyword heading word, protocol supplementary concept                                                                        | 110536   |
| 40 |   |                                                                                                                                                                                                                                                                                                | Advanced |
| 41 |   |                                                                                                                                                                                                                                                                                                |          |
| 42 |   |                                                                                                                                                                                                                                                                                                |          |
| 43 |   |                                                                                                                                                                                                                                                                                                |          |
| 44 |   |                                                                                                                                                                                                                                                                                                |          |
| 45 |   |                                                                                                                                                                                                                                                                                                |          |
| 46 |   |                                                                                                                                                                                                                                                                                                |          |
| 47 |   |                                                                                                                                                                                                                                                                                                |          |
| 48 |   |                                                                                                                                                                                                                                                                                                |          |
| 49 |   |                                                                                                                                                                                                                                                                                                |          |

|    |                                                                                                                                                                                                                                                                                             |      |          |
|----|---------------------------------------------------------------------------------------------------------------------------------------------------------------------------------------------------------------------------------------------------------------------------------------------|------|----------|
|    | word, rare disease supplementary concept word, unique identifier]                                                                                                                                                                                                                           |      |          |
| 10 | 1 and 8                                                                                                                                                                                                                                                                                     | 749  | Advanced |
| 11 | 1 and 9                                                                                                                                                                                                                                                                                     | 1089 | Advanced |
| 12 | 7 or 10 or 11                                                                                                                                                                                                                                                                               | 2151 | Advanced |
| 13 | limit 12 to randomized controlled trial                                                                                                                                                                                                                                                     | 87   | Advanced |
| 14 | 12 and intervention*.mp. [mp=title, abstract, original title, name of substance word, subject heading word, keyword heading word, protocol supplementary concept word, rare disease supplementary concept word, unique identifier]                                                          | 290  | Advanced |
| 15 | 12 and (behavior* or behaviour* or adher* or education* or aware* or stigma*).mp. [mp=title, abstract, original title, name of substance word, subject heading word, keyword heading word, protocol supplementary concept word, rare disease supplementary concept word, unique identifier] | 573  | Advanced |
| 16 | 13 or 14                                                                                                                                                                                                                                                                                    | 330  | Advanced |
| 17 | 3 or 7 or 12                                                                                                                                                                                                                                                                                | 2695 | Advanced |
| 18 | intervention*.mp. and 17 [mp=title, abstract, original title, name of substance word, subject heading word, keyword heading word, protocol supplementary concept word, rare disease supplementary concept word, unique identifier]                                                          | 512  | Advanced |
| 19 | 13 or 18                                                                                                                                                                                                                                                                                    | 552  | Advanced |



1  
2  
3  
4  
5  
6  
7  
8  
9  
10  
11  
12  
13  
14  
15  
16  
17  
18  
19  
20  
21  
22  
23  
24  
25  
26  
27  
28  
29  
30  
31  
32  
33  
34  
35  
36  
37  
38  
39  
40  
41  
42  
43  
44  
45  
46  
47  
48  
49

|    |                                                                                                                                                                                                                              |     |          |
|----|------------------------------------------------------------------------------------------------------------------------------------------------------------------------------------------------------------------------------|-----|----------|
| 20 | 17 and random*.mp. [mp=title, abstract, original title, name of substance word, subject heading word, keyword heading word, protocol supplementary concept word, rare disease supplementary concept word, unique identifier] | 338 | Advanced |
| 21 | 19 or 20                                                                                                                                                                                                                     | 676 | Advanced |
| 22 | remove duplicates from 21                                                                                                                                                                                                    | 665 |          |

CENTRAL – same strategy – 205

| Embase 1988 to 2016 Week 04 |                                                                                                                                                                                                                      |         |             |
|-----------------------------|----------------------------------------------------------------------------------------------------------------------------------------------------------------------------------------------------------------------|---------|-------------|
| #                           | Searches                                                                                                                                                                                                             | Results | Search Type |
| 1                           | *diabetes mellitus, type 2/ or "type 2 diabet*".tw. or niddm.mp. or t2dm.mp. [mp=title, abstract, heading word, drug trade name, original title, device manufacturer, drug manufacturer, device trade name, keyword] | 142471  | Advanced    |
| 2                           | ("social network" or "social support").mp. [mp=title, abstract, heading word, drug trade name, original title, device manufacturer, drug manufacturer, device trade name, keyword]                                   | 79400   | Advanced    |
| 3                           | 1 and 2                                                                                                                                                                                                              | 645     | Advanced    |
| 4                           | family relations/ or family conflict/ or intergenerational relations/ or sibling relations/                                                                                                                          | 69298   | Advanced    |

|    |                                                                                                                                                                                                                              |        |          |
|----|------------------------------------------------------------------------------------------------------------------------------------------------------------------------------------------------------------------------------|--------|----------|
| 5  | family/ or adult children/ or family relations/                                                                                                                                                                              | 70584  | Advanced |
| 6  | family role/ or family therapy/                                                                                                                                                                                              | 8709   | Advanced |
| 7  | 1 and (4 or 5 or 6)                                                                                                                                                                                                          | 439    | Advanced |
| 8  | (couple or couples or married or spous* or partner*1 or household or neighbor*1).mp. [mp=title, abstract, heading word, drug trade name, original title, device manufacturer, drug manufacturer, device trade name, keyword] | 265365 | Advanced |
| 9  | (church* or religious* or husband* or wife* or relatives or "family based").mp. [mp=title, abstract, heading word, drug trade name, original title, device manufacturer, drug manufacturer, device trade name, keyword]      | 109824 | Advanced |
| 10 | 1 and 8                                                                                                                                                                                                                      | 1041   | Advanced |
| 11 | 1 and 9                                                                                                                                                                                                                      | 1305   | Advanced |
| 12 | 7 or 10 or 11                                                                                                                                                                                                                | 2620   | Advanced |
| 13 | 3 or 12                                                                                                                                                                                                                      | 3134   | Advanced |
| 14 | 13 and intervention*.mp. [mp=title, abstract, heading word, drug trade name, original title, device manufacturer, drug manufacturer, device trade name, keyword]                                                             | 653    | Advanced |
| 15 | randomized controlled trial/                                                                                                                                                                                                 | 376080 | Advanced |
| 16 | 13 and 15                                                                                                                                                                                                                    | 158    | Advanced |

1  
2  
3  
4  
5  
6  
7  
8  
9  
10  
11  
12  
13  
14  
15  
16  
17  
18  
19  
20  
21  
22  
23  
24  
25  
26  
27  
28  
29  
30  
31  
32  
33  
34  
35  
36  
37  
38  
39  
40  
41  
42  
43  
44  
45  
46  
47  
48  
49

|    |                                                                                                                                                            |        |          |
|----|------------------------------------------------------------------------------------------------------------------------------------------------------------|--------|----------|
| 17 | 13 and random*.mp. [mp=title, abstract, heading word, drug trade name, original title, device manufacturer, drug manufacturer, device trade name, keyword] | 410    | Advanced |
| 18 | 14 or 16 or 17                                                                                                                                             | 847    | Advanced |
| 19 | limit 18 to human                                                                                                                                          | 796    | Advanced |
| 20 | non insulin dependent diabetes mellitus/                                                                                                                   | 166150 | Advanced |
| 21 | 19 and 20                                                                                                                                                  | 665    |          |

**PsycINFO** 1987 to January Week 3 2016

| # | Searches                                                                                                                                                                           | Results | Search Type |
|---|------------------------------------------------------------------------------------------------------------------------------------------------------------------------------------|---------|-------------|
| 1 | diabetes mellitus/                                                                                                                                                                 | 4189    | Advanced    |
| 2 | 1 and ("type 2" or noninsulin* or "non insulin" or niddm or t2d or t2dm).mp. [mp=title, abstract, heading word, table of contents, key concepts, original title, tests & measures] | 1815    | Advanced    |
| 3 | exp social support/                                                                                                                                                                | 26965   | Advanced    |
| 4 | social networks/ or exp social groups/ or exp social interaction/ or exp social support/ or exp support groups/                                                                    | 276211  | Advanced    |
| 5 | 2 and (3 or 4)                                                                                                                                                                     | 90      | Advanced    |

|    |                                                                                                                                            |        |          |
|----|--------------------------------------------------------------------------------------------------------------------------------------------|--------|----------|
| 6  | exp Family Therapy/ or family.mp. or exp Family Relations/ or exp Family/ or exp Family Systems Theory/ or exp Family Structure/           | 282330 | Advanced |
| 7  | couples/ or cohabitation/ or dyads/ or significant others/ or exp spouses/                                                                 | 25371  | Advanced |
| 8  | 2 and (6 or 7)                                                                                                                             | 195    | Advanced |
| 9  | 5 or 8                                                                                                                                     | 258    | Advanced |
| 10 | limit 9 to ("0830 systematic review" or 1200 meta analysis)                                                                                | 1      | Advanced |
| 11 | 9 and (intervention* or random*).mp. [mp=title, abstract, heading word, table of contents, key concepts, original title, tests & measures] | 78     | Advanced |
| 12 | 10 or 11                                                                                                                                   | 79     | Advanced |
| 13 | limit 12 to all journals                                                                                                                   | 55     |          |

## CINAHL

| #   | Query                                                             | Limiters/Expanders            | Last Run Via                                                                                                    | Results |
|-----|-------------------------------------------------------------------|-------------------------------|-----------------------------------------------------------------------------------------------------------------|---------|
| S12 | S8 AND S11                                                        | Search modes - Boolean/Phrase | Interface - EBSCOhost Research Databases<br>Search Screen - Advanced Search<br>Database - CINAHL with Full Text | 9       |
| S11 | S5 AND S10                                                        | Search modes - Boolean/Phrase | Interface - EBSCOhost Research Databases<br>Search Screen - Advanced Search<br>Database - CINAHL with Full Text | 78      |
| S10 | (MH "Family+") OR (MH "Family Relations+") OR (MH "Patient-Family | Search modes - Boolean/Phrase | Interface - EBSCOhost Research Databases<br>Search Screen - Advanced Search                                     | 123,032 |

1  
2  
3  
4  
5  
6  
7  
8  
9  
10  
11  
12  
13  
14  
15  
16  
17  
18  
19  
20  
21  
22  
23  
24  
25  
26  
27  
28  
29  
30  
31  
32  
33  
34  
35  
36  
37  
38  
39  
40  
41  
42  
43  
44  
45  
46  
47  
48  
49

|    |                                                                                                                                                           |                               |                                                                                                                 |         |
|----|-----------------------------------------------------------------------------------------------------------------------------------------------------------|-------------------------------|-----------------------------------------------------------------------------------------------------------------|---------|
|    | Relations") OR (MH "Nuclear Family+") OR (MH "Family Attitudes+")                                                                                         |                               | Database - CINAHL with Full Text                                                                                |         |
| S9 | S5 AND S8                                                                                                                                                 | Search modes - Boolean/Phrase | Interface - EBSCOhost Research Databases<br>Search Screen - Advanced Search<br>Database - CINAHL with Full Text | 75      |
| S8 | S6 OR S7                                                                                                                                                  | Search modes - Boolean/Phrase | Interface - EBSCOhost Research Databases<br>Search Screen - Advanced Search<br>Database - CINAHL with Full Text | 129,321 |
| S7 | (MH "Intervention Trials") OR "intervention"                                                                                                              | Search modes - Boolean/Phrase | Interface - EBSCOhost Research Databases<br>Search Screen - Advanced Search<br>Database - CINAHL with Full Text | 111,076 |
| S6 | (MH "Randomized Controlled Trials")                                                                                                                       | Search modes - Boolean/Phrase | Interface - EBSCOhost Research Databases<br>Search Screen - Advanced Search<br>Database - CINAHL with Full Text | 25,142  |
| S5 | S1 AND S4                                                                                                                                                 | Search modes - Boolean/Phrase | Interface - EBSCOhost Research Databases<br>Search Screen - Advanced Search<br>Database - CINAHL with Full Text | 385     |
| S4 | S2 OR S3                                                                                                                                                  | Search modes - Boolean/Phrase | Interface - EBSCOhost Research Databases<br>Search Screen - Advanced Search<br>Database - CINAHL with Full Text | 48,947  |
| S3 | (MH "Young Adult Social Support Index") OR (MH "Social Support Index") OR (MH "Social Support (Iowa NOC)") OR (MH "Norbeck Social Support Questionnaire") | Search modes - Boolean/Phrase | Interface - EBSCOhost Research Databases<br>Search Screen - Advanced Search<br>Database - CINAHL with Full Text | 289     |
| S2 | (MH "Social Networks") OR (MH "Social Network Analysis (Saba CCC)") OR (MH "Support, Psychosocial+")                                                      | Search modes - Boolean/Phrase | Interface - EBSCOhost Research Databases<br>Search Screen - Advanced Search<br>Database - CINAHL with Full Text | 48,840  |
| S1 | (MH "Diabetes Mellitus, Type 2")                                                                                                                          | Search modes - Boolean/Phrase | Interface - EBSCOhost Research Databases<br>Search Screen - Advanced Search<br>Database - CINAHL with Full Text | 26,607  |

Supplement Table S5. Search strategy

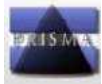

# PRISMA 2009 Checklist

1  
2  
3  
4  
5  
6  
7  
8  
9  
10  
11  
12  
13  
14  
15  
16  
17  
18  
19  
20  
21  
22  
23  
24  
25  
26  
27  
28  
29  
30  
31  
32  
33  
34  
35  
36  
37  
38  
39  
40  
41  
42  
43  
44  
45  
46  
47  
48  
49

| Section/topic                      | #  | Checklist item                                                                                                                                                                                                                                                                                              | Reported on page # |
|------------------------------------|----|-------------------------------------------------------------------------------------------------------------------------------------------------------------------------------------------------------------------------------------------------------------------------------------------------------------|--------------------|
| <b>TITLE</b>                       |    |                                                                                                                                                                                                                                                                                                             |                    |
| Title                              | 1  | Identify the report as a systematic review, meta-analysis, or both.                                                                                                                                                                                                                                         | 1                  |
| <b>ABSTRACT</b>                    |    |                                                                                                                                                                                                                                                                                                             |                    |
| Structured summary                 | 2  | Provide a structured summary including, as applicable: background; objectives; data sources; study eligibility criteria, participants, and interventions; study appraisal and synthesis methods; results; limitations; conclusions and implications of key findings; systematic review registration number. | 3                  |
| <b>INTRODUCTION</b>                |    |                                                                                                                                                                                                                                                                                                             |                    |
| Rationale                          | 3  | Describe the rationale for the review in the context of what is already known.                                                                                                                                                                                                                              | 5                  |
| Objectives                         | 4  | Provide an explicit statement of questions being addressed with reference to participants, interventions, comparisons, outcomes, and study design (PICOS).                                                                                                                                                  | 6                  |
| <b>METHODS</b>                     |    |                                                                                                                                                                                                                                                                                                             |                    |
| Protocol and registration          | 5  | Indicate if a review protocol exists, if and where it can be accessed (e.g., Web address), and, if available, provide registration information including registration number.                                                                                                                               | 6                  |
| Eligibility criteria               | 6  | Specify study characteristics (e.g., PICOS, length of follow-up) and report characteristics (e.g., years considered, language, publication status) used as criteria for eligibility, giving rationale.                                                                                                      | 6-7                |
| Information sources                | 7  | Describe all information sources (e.g., databases with dates of coverage, contact with study authors to identify additional studies) in the search and date last searched.                                                                                                                                  | 7 and supplement   |
| Search                             | 8  | Present full electronic search strategy for at least one database, including any limits used, such that it could be repeated.                                                                                                                                                                               | supplement         |
| Study selection                    | 9  | State the process for selecting studies (i.e., screening, eligibility, included in systematic review, and, if applicable, included in the meta-analysis).                                                                                                                                                   | 7-8                |
| Data collection process            | 10 | Describe method of data extraction from reports (e.g., piloted forms, independently, in duplicate) and any processes for obtaining and confirming data from investigators.                                                                                                                                  | 8                  |
| Data items                         | 11 | List and define all variables for which data were sought (e.g., PICOS, funding sources) and any assumptions and simplifications made.                                                                                                                                                                       | 8                  |
| Risk of bias in individual studies | 12 | Describe methods used for assessing risk of bias of individual studies (including specification of whether this was done at the study or outcome level), and how this information is to be used in any data synthesis.                                                                                      | 9                  |
| Summary measures                   | 13 | State the principal summary measures (e.g., risk ratio, difference in means).                                                                                                                                                                                                                               | 9-10               |
| Synthesis of results               | 14 | Describe the methods of handling data and combining results of studies, if done, including measures of consistency (e.g., $I^2$ ) for each meta-analysis.                                                                                                                                                   | 10                 |

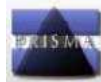

# PRISMA 2009 Checklist

Page 1 of 2

| Section/topic                 | #  | Checklist item                                                                                                                                                                                           | Reported on page #                |
|-------------------------------|----|----------------------------------------------------------------------------------------------------------------------------------------------------------------------------------------------------------|-----------------------------------|
| Risk of bias across studies   | 15 | Specify any assessment of risk of bias that may affect the cumulative evidence (e.g., publication bias, selective reporting within studies).                                                             | 10                                |
| Additional analyses           | 16 | Describe methods of additional analyses (e.g., sensitivity or subgroup analyses, meta-regression), if done, indicating which were pre-specified.                                                         | 10                                |
| <b>RESULTS</b>                |    |                                                                                                                                                                                                          |                                   |
| Study selection               | 17 | Give numbers of studies screened, assessed for eligibility, and included in the review, with reasons for exclusions at each stage, ideally with a flow diagram.                                          | 11                                |
| Study characteristics         | 18 | For each study, present characteristics for which data were extracted (e.g., study size, PICOS, follow-up period) and provide the citations.                                                             | 11, supp table s1                 |
| Risk of bias within studies   | 19 | Present data on risk of bias of each study and, if available, any outcome level assessment (see item 12).                                                                                                | 11, supp fig s1, supp table s3    |
| Results of individual studies | 20 | For all outcomes considered (benefits or harms), present, for each study: (a) simple summary data for each intervention group (b) effect estimates and confidence intervals, ideally with a forest plot. | 11-12, fig 4                      |
| Synthesis of results          | 21 | Present results of each meta-analysis done, including confidence intervals and measures of consistency.                                                                                                  | 11-12                             |
| Risk of bias across studies   | 22 | Present results of any assessment of risk of bias across studies (see Item 15).                                                                                                                          | 11-12, supp fig s1, supp table s3 |
| Additional analysis           | 23 | Give results of additional analyses, if done (e.g., sensitivity or subgroup analyses, meta-regression [see Item 16]).                                                                                    | 11-12, sup table s4               |
| <b>DISCUSSION</b>             |    |                                                                                                                                                                                                          |                                   |
| Summary of evidence           | 24 | Summarize the main findings including the strength of evidence for each main outcome; consider their relevance to key groups (e.g., healthcare providers, users, and policy makers).                     | 13                                |
| Limitations                   | 25 | Discuss limitations at study and outcome level (e.g., risk of bias), and at review-level (e.g., incomplete retrieval of identified research, reporting bias).                                            | 13-14                             |
| Conclusions                   | 26 | Provide a general interpretation of the results in the context of other evidence, and implications for future research.                                                                                  | 14-16                             |

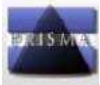

## PRISMA 2009 Checklist

| FUNDING |    |                                                                                                                                            |    |
|---------|----|--------------------------------------------------------------------------------------------------------------------------------------------|----|
| Funding | 27 | Describe sources of funding for the systematic review and other support (e.g., supply of data); role of funders for the systematic review. | 17 |

From: Moher D, Liberati A, Tetzlaff J, Altman DG, The PRISMA Group (2009). Preferred Reporting Items for Systematic Reviews and Meta-Analyses: The PRISMA Statement. PLoS Med 6(6): e1000097. doi:10.1371/journal.pmed1000097

For more information, visit: [www.prisma-statement.org](http://www.prisma-statement.org).

Page 2 of 2



# BMJ Open

## A systematic review and meta-analysis of trials of social network interventions in type 2 diabetes

|                                 |                                                                                                                                                                                                                                                                                                                                                      |
|---------------------------------|------------------------------------------------------------------------------------------------------------------------------------------------------------------------------------------------------------------------------------------------------------------------------------------------------------------------------------------------------|
| Journal:                        | <i>BMJ Open</i>                                                                                                                                                                                                                                                                                                                                      |
| Manuscript ID                   | bmjopen-2017-016506.R1                                                                                                                                                                                                                                                                                                                               |
| Article Type:                   | Research                                                                                                                                                                                                                                                                                                                                             |
| Date Submitted by the Author:   | 24-May-2017                                                                                                                                                                                                                                                                                                                                          |
| Complete List of Authors:       | Spencer-Bonilla, Gabriela ; Mayo Clinic, Ponce, Oscar<br>Rodriguez-Gutierrez, R; Mayo Clinic<br>Alvarez-Villalobos, Neri<br>Erwin, Patricia; Mayo Clinic College of Medicine<br>Larrea-Mantilla, Laura<br>Rogers, Anne; University of Southampton, Faculty of Health Sciences<br>Montori, Victor; Mayo Clinic, Knowledge and Encounter Research Unit |
| <b>Primary Subject Heading</b>: | Diabetes and endocrinology                                                                                                                                                                                                                                                                                                                           |
| Secondary Subject Heading:      | Patient-centred medicine, Public health, Nutrition and metabolism                                                                                                                                                                                                                                                                                    |
| Keywords:                       | General diabetes < DIABETES & ENDOCRINOLOGY, Diabetes & endocrinology < INTERNAL MEDICINE, PUBLIC HEALTH                                                                                                                                                                                                                                             |
|                                 |                                                                                                                                                                                                                                                                                                                                                      |

SCHOLARONE™  
Manuscripts

1  
2  
3 **Title:** A systematic review and meta-analysis of trials of social network interventions in type 2  
4  
5 diabetes  
6

7  
8 **Short title:** Social network interventions in type 2 diabetes  
9

10 **Authors:** Gabriela Spencer-Bonilla<sup>1,2</sup>, Oscar J. Ponce<sup>1,3</sup>, Rene Rodriguez-Gutierrez<sup>1,3</sup>, Neri  
11  
12 Alvarez-Villalobos<sup>1,5</sup>, Patricia J. Erwin<sup>6</sup>, Laura Larrea-Mantilla<sup>1,7</sup>, Anne Rogers<sup>8</sup>, Victor M.  
13  
14 Montori\*<sup>1</sup>  
15

16  
17 **Affiliations:** <sup>1</sup> Department of Medicine, Mayo Clinic, Rochester, MN, 55905, USA.  
18

19  
20 <sup>2</sup> School of Medicine, University of Puerto Rico Medical Sciences Campus, San Juan, PR,  
21  
22 00936, USA  
23

24  
25 <sup>3</sup> Department of Medicine, Universidad Peruana Cayetano Heredia, Lima, 31, Peru  
26

27  
28 <sup>4</sup> Department of Internal Medicine, University Hospital "Dr. Jose E. Gonzalez", Autonomous  
29  
30 University of Nuevo Leon, Monterrey, 66460, Mexico  
31

32  
33 <sup>5</sup> Medical Statistics Department, University Hospital "Dr. Jose E. Gonzalez Autonomous  
34  
35 University of Nuevo Leon", Nuevo León, Monterrey, 64460, México  
36

37  
38 <sup>6</sup> Mayo Medical Library, Mayo Clinic, Rochester, MN, 55905, USA  
39

40  
41 <sup>7</sup> Evidence-Based Practice Center, Mayo Clinic, Rochester, MN, 55905, USA  
42

43  
44 <sup>8</sup> NIHR CLAHRC Wessex, Health Sciences, University of Southampton, Southampton, UK  
45

46 **\* Correspondence to:**

47 Victor M. Montori, MD MSc

48 Knowledge and Evaluation Research Unit

49 Division of Endocrinology, Diabetes, Metabolism and Nutrition

50 Mayo Clinic

51  
52  
53  
54  
55  
56  
57  
58  
59  
60  
200 1st Street SW, Rochester, MN 55905

1  
2  
3 Phone: (507) 293-0175  
4

5 E-mail: [montori.victor@mayo.edu](mailto:montori.victor@mayo.edu)  
6

7 **Word count: 3,252**  
8

9  
10 **Table and figure count: 5**  
11

12  
13 **Supplemental table and figure count: 7**  
14  
15  
16  
17  
18  
19  
20  
21  
22  
23  
24  
25  
26  
27  
28  
29  
30  
31  
32  
33  
34  
35  
36  
37  
38  
39  
40  
41  
42  
43  
44  
45  
46  
47  
48  
49  
50  
51  
52  
53  
54  
55  
56  
57  
58  
59  
60

For peer review only

**ABSTRACT**

**Objectives:** In the care of patients with type 2 diabetes, self-management is emphasized and studied while theory and observations suggest that patients also benefit from social support. We sought to assess the effect of social network interventions on social support, glycemic control, and quality of life in patients with type 2 diabetes.

**Research Design and Methods:** We searched Ovid MEDLINE, Ovid EBM Reviews, Cochrane Central Register of Controlled Trials, EMBASE, PsycINFO, and CINAHL through April 2017 for randomized trials (RCTs) of social network interventions in patients with type 2 diabetes. Reviewers working independently and in duplicate assessed eligibility and risk of bias, and extracted data from eligible RCTs. We pooled estimates using inverse variance random-effects meta-analysis.

**Results:** We found 19 eligible RCTs enrolling 2162 participants. Social network interventions were paradoxically commonly based on individualistic theories of self-management, were educational, and sought to engage social network members for their knowledge and experience. Interventions improved social support (0.88 standard deviations [95% CI: 0.40, 1.36],  $I^2=90\%$ ), and HbA1c at 3 months (-0.23 percentage points [95% CI: -0.38, -0.08],  $I^2=12\%$ ), but not quality of life.

**Conclusions:** Despite a compelling theoretical base, researchers have only minimally studied the value of interventions targeting patients' social networks on diabetes care. Although the body of evidence to date is limited, and based on individualistic theories, the results are promising. This review challenges the scientific community to design and test theory-based interventions that go beyond self-management approaches to focus on the largely untapped potential of social networks to improve diabetes care.

**PROSPERO registration:** CRD42016036117

## ARTICLE SUMMARY

### Strengths and limitations

- This systematic review and meta-analysis was strengthened by a thorough literature search, author contact, reproducible judgments about the inclusion and appraisal of the evidence, and theory-based discussion of its results.
- The review found and summarized few reports of randomized trials testing interventions with poor theoretical alignment and limited protection against bias, which produced imprecise and inconsistent estimates of effect on markers of social support and short-term diabetes control.
- These limitations notwithstanding, this first meta-analysis of randomized trials of social network interventions identified an important knowledge (and practice) gap in the care of patients with type 2 diabetes, and produced a theoretical model connecting social network interventions with outcomes in these and other patients living with chronic conditions.

## 1. INTRODUCTION

Patients with type 2 diabetes are expected to implement self-management practices – self-testing, diet and activity regimens, medication administration – into their daily routines, along with frequent office visits for examination and laboratory testing to reduce the risk of complications of their diabetes and its comorbidities. Patients must have sufficient capacity to shoulder this workload;<sup>1</sup> the workload and its impact on patient functioning and well-being reflect the burden of treatment.<sup>2</sup> Self-management programs based on individualistic theories of knowledge, beliefs and self-efficacy,<sup>3 4</sup> delegate work to patients. Without support or sufficient capacity, these delegations can overwhelm patients and contribute to burden of treatment which is associated with decreased adherence to medical recommendations and exhaustion with self-care.<sup>2</sup>

Patients do not enact the work of self-management in isolation. Rather, social relationships are often cited as essential to managing type 2 diabetes. Observational studies have repeatedly found that better social support is associated with effective diabetes self-management and better efficacy of self-management interventions.<sup>5 6</sup> Social networks can support diabetes self-management by sharing knowledge and by facilitating access to resources, but only to the extent that patients can engage and maintain productive relationships with network members (**Figure 1**).<sup>7</sup> Social networks may, therefore, mitigate (or exacerbate when dysfunctional) the workload patients must shoulder and impact diabetes care. Yet, social networks are not usually considered in the design and evaluation of chronic disease management interventions. Furthermore, the impact of interventions based on social theories and aimed at supporting social networks on the care and outcomes of patients with type 2 diabetes remains unknown.

1  
2  
3 In this review, we summarize the literature evaluating social network interventions tested  
4 in randomized clinical trials (RCTs) that targeted friends, families, peers and communities of  
5 patients with type 2 diabetes. We describe the interventions, their theoretical underpinnings, how  
6 social networks are involved, and the efficacy of the interventions in terms of social support,  
7 quality of life, and glycemic control relative to interventions that did not target patients' social  
8 networks.  
9  
10  
11  
12  
13  
14  
15  
16

## 17 **2. METHODS**

### 18 *2.1 Protocol and Registration*

19  
20 This review adhered to the Preferred Reporting Items for Systematic Reviews and Meta-  
21 analysis (PRISMA) Statement<sup>8</sup> and has a registered protocol (PROSPERO registration:  
22 CRD42016036117).<sup>9</sup>  
23  
24  
25  
26  
27  
28

### 29 *2.2 Eligibility Criteria*

30  
31 We included RCTs testing interventions for type 2 diabetes management that  
32 involved patients' social networks (families, friends, peers and communities) in any capacity.  
33 RCTs had to evaluate interventions targeting dyadic (e.g. a spouse or friend) or community (ie.  
34 network of networks like neighborhoods, families and churches) networks<sup>10</sup> based on enduring  
35 social relationships likely to be involved in the patients' lives over the long periods of time  
36 required for self-management.<sup>11</sup> Thus, we excluded RCTs involving social relationships created  
37 for the trial, e.g., RCTs testing interventions enrolling and training patients with type 2 diabetes  
38 to provide peer support to other participants using online communities.  
39  
40  
41  
42  
43  
44  
45  
46  
47  
48  
49

### 50 *2.3 Data Sources and Searches*

51  
52 A comprehensive electronic search of Ovid MEDLINE, Ovid EBM Reviews,  
53 Cochrane Central Register of Controlled Trials, EMBASE, PsycINFO, and EBSCO CINAHL  
54  
55  
56  
57  
58  
59  
60

1  
2  
3 was performed from inception of each database through the second week of April 2017 to  
4  
5 identify published studies and conference abstracts. Working with an experienced medical  
6  
7 librarian (P.J.E), G.S-B. developed a sensitive search strategy to identify eligible RCTs. Previous  
8  
9 qualitative studies in the field<sup>4 7 10</sup> were used to identify relevant search terms such as descriptors  
10  
11 of the constitution or properties of social networks (e.g. *social, couples, spouse, family* and  
12  
13 *church*) and terms related to relationships (e.g. *stigma and support*). The full search strategy is  
14  
15 available as **Supplemental Table S1**. There were no restrictions by date of publication or  
16  
17 language. Reference lists of included articles, reviews and qualitative syntheses on the topic were  
18  
19 hand-searched to identify any potentially eligible studies that may have been missed by our  
20  
21 electronic search strategy. An expert in the field (A.R.) reviewed the list of included studies for  
22  
23 missed articles.  
24  
25  
26  
27  
28

## 29 **2.4 Study Selection**

30  
31  
32 Three reviewers (G.S.B, R.R-G. and O.J.P.), working independently, in pairs, and in  
33  
34 duplicate, considered the eligibility of titles and abstracts that resulted from the search after  
35  
36 calibrating with 20 abstracts. As part of calibration, eligibility criteria were iterated for clarity  
37  
38 and consistency while considering examples of pre-existing and made-for-the-trial social  
39  
40 networks.  
41  
42

43  
44 Reviewers, working independently and in duplicate, considered all available full-text  
45  
46 reports for eligibility, obtained if at least one reviewer considered the abstract potentially  
47  
48 eligible. Before full-text screening, the reviewers calibrated their judgments using 10 eligible  
49  
50 reports. Reasons for exclusion were not mutually exclusive, therefore reviewers agreed to  
51  
52 prioritize reasons for exclusion as follows: (1) inappropriate population, (2) unsuitable study  
53  
54 design, (3) inappropriate intervention, and (4) no outcomes of interest reported. After completion  
55  
56  
57  
58  
59  
60



1  
2  
3 of full-text screening, chance-adjusted agreement was quantified using the kappa statistic,<sup>12</sup> and  
4  
5 disagreements resolved by discussion and consensus among the three reviewers. We  
6  
7 subsequently searched MEDLINE with the first and last authors' last names for protocols for  
8  
9 other relevant publications (e.g., pilots and results at different follow-up lengths) to obtain  
10  
11 additional details about the included RCTs.  
12  
13

### 14 ***2.5 Data Extraction and Quality Assessment***

15  
16  
17 The three reviewers, calibrated using two reports, performed data extraction  
18  
19 independently and in duplicate using a standardized form. Extracted data included a full  
20  
21 description of study characteristics: design, setting where recruitment took place, participant  
22  
23 eligibility criteria, conceptual frameworks justifying the interventions, and of baseline participant  
24  
25 characteristics. For each intervention, we sought details about who delivered the intervention, to  
26  
27 whom (which members of the social network were involved), dose (duration and frequency of  
28  
29 sessions, total contact time), and fidelity (monitoring of fidelity to the protocol and extent of  
30  
31 participant attendance and reasons for non-attendance). We planned to extract the following  
32  
33 outcomes: quality of life, social support, treatment burden, metabolic control, and diabetes-  
34  
35 related morbidity and mortality; no trials however, reported diabetes-related morbidity and  
36  
37 mortality as outcomes measures. Eligible trials reporting on at least one of these outcomes were  
38  
39 included.  
40  
41  
42  
43  
44

45  
46 Due to the heterogeneity of included interventions, we described and classified  
47  
48 intervention and comparator components using modified versions of previously published  
49  
50 frameworks.<sup>7 13</sup> After piloting this procedure with 2 RCTs, two reviewers classified the  
51  
52 interventions using line-by-line coding of trial methods. Conflicts were resolved by consensus.  
53  
54  
55  
56  
57  
58  
59  
60

1  
2  
3 The three reviewers, independently and in duplicate, assessed each RCT's risk of bias  
4 using the Cochrane tool,<sup>14</sup> recognizing the impossibility of blinding participants and  
5 interventionists (persons delivering the intervention, e.g. physician, nurse educators) to  
6 intervention allocation.<sup>15</sup> These could not be disregarded, however, because subjective and  
7 patient-reported outcomes were assessed. Publication bias could not be assessed statistically or  
8 graphically given the small number and inconsistency of included RCTs. The overall confidence  
9 in the results was rated using the Grading of Recommendations Assessment, Development and  
10 Evaluation (GRADE) approach.<sup>16</sup> This approach assesses the confidence merited by the body of  
11 evidence based on the risk of bias of the individual studies, inconsistency in the results,  
12 indirectness, imprecision, and other considerations.  
13  
14  
15  
16  
17  
18  
19  
20  
21  
22  
23  
24  
25

## 26 **2.6 Author Contact**

27  
28 For all included RCTs, we asked the corresponding author via email to complete a  
29 table of missing data and risk of bias information. Non-responders received a second  
30 communication two weeks later. Four of 19 authors responded with complete or partial data; one  
31 author reported no longer having access to necessary data.  
32  
33  
34  
35  
36  
37  
38  
39

## 40 **2.7 Data Synthesis and Analysis**

41  
42 We used Review Manager version 5.3 to conduct meta-analyses.<sup>17</sup> When possible, we  
43 generated meta-analytic estimates of treatment effects using the inverse variance random-effects  
44 model. When trials had more than one comparator to the intervention of interest, we chose the  
45 arm whose procedures most resembled usual care or no intervention, as this was the most  
46 common comparator for two-arm trials. Meta-analyses generated either a weighted mean  
47 difference expressed in usual units (e.g., HbA1c) or a mean difference expressed in standard-  
48 deviation units, a common approach that enables pooling across different scales assessing the  
49  
50  
51  
52  
53  
54  
55  
56  
57  
58  
59  
60

1  
2  
3 same construct (e.g., quality of life). A standardized mean difference (SDM) of 0.5 standard  
4  
5 deviations or greater was considered important.<sup>18</sup>  
6  
7

8 To determine the impact of interventions on HbA1c, we pooled results at 3 months  
9  
10 (represented by studies reporting results from 2 to 4 months of follow-up), 6 months (5-7 months  
11  
12 of follow-up) or greater (>7 months of follow up). Otherwise, values at longest follow-up were  
13  
14 used for all outcomes. Missing measures of variability were imputed either from data reported at  
15  
16 another time-point in the same trial and in the same arm (when available) or as the average  
17  
18 standard deviation observed across all RCTs. Inconsistency for each outcome not attributable to  
19  
20 chance was assessed visually using forest plots and estimated using the  $I^2$  statistic.  $I^2 < 25\%$   
21  
22 reflected low inconsistency;  $I^2 > 75\%$  reflected high inconsistency.<sup>19</sup>  
23  
24  
25  
26

## 27 ***2.8 Modifications to the registered protocol***

28  
29 The included trials were heterogeneous in terms of length of follow-up. In addition to  
30  
31 performing pooled analyses for HbA1c at 3, 6, and >7 months of follow-up, to increase the  
32  
33 power and applicability of our analyses, we also pooled all measures of HbA1c at the longest  
34  
35 follow-up reported.  
36  
37  
38

## 39 ***2.9 Subgroup Analyses***

40  
41  
42 To understand inconsistency in results, we planned a few subgroup analyses on social  
43  
44 support, HbA1c results and quality of life, but sparse data prevented the latter. We tested  
45  
46 treatment interactions with risk of bias (low vs. moderate or high), level of glycemic control at  
47  
48 baseline (mean baseline HbA1c>8%), and intervention features. Network subgroups were drawn  
49  
50 by whether the target of the intervention was (1) a patient- or an investigator-selected (by  
51  
52 protocol, e.g., the patient's spouse) social network member; (2) a member of the patient's  
53  
54 household or not as reported in the trial inclusion criteria; (if the social network member  
55  
56  
57  
58  
59  
60

involved was a spouse, they were assumed to be household members); and (3) a dyadic network or a group of more than two people. We also tested subgroups based on whether the intervention was based on a specific underlying framework or not, and on the duration in contact minutes with the interventionist using a median split. For each analysis, we estimated the subgroup effect and conducted a test of interaction. Because most subgroup analyses were underpowered and exploratory, we did not adjust alpha levels for multiple comparisons.

### 3. RESULTS

#### 3.1 Study Selection

**Figure 2** demonstrates the study selection process. We found 1208 records (7 of which were identified through hand-search); 137 were identified as potentially eligible for inclusion after title and abstract screening. We reproducibly ( $k=.73$ ) included 19 trials; 17 patient-randomized trials<sup>20-29 30-40</sup> and 2 cluster-randomized trials<sup>41 42</sup>; overall these trials enrolled 2162 participants.

#### 3.2 Study Characteristics

**Table 1** describes these RCTs. Thirteen of the 19 RCTs reported an underlying framework for the intervention either in publication or after author contact.<sup>20 23 24 27 30 31 36-40 42</sup>

While variability in all study characteristics was the norm, most RCTs took place in the community, with the experimental intervention delivering education, information transfer, goal-setting and problem solving (**Figure 3, Table 1**). Social networks -- family members, spouses or partners -- were most commonly employed to share knowledge and experience. Overall chance-adjusted agreement for classification of intervention and comparator procedures (**Figure 3**) was good ( $kappa=.79$ ); comparators used in trials were heterogeneous. **Supplemental Table S2** describes baseline characteristics of RCT participants. One RCT only enrolled patients with

| Study               | Notable inclusion criteria                                                             | Intervention description                                                            | Underlying framework                        | Support network involved            | Intervention deliverer(s)                               | Setting where intervention was delivered | Length (months) | Intervention contact time (minutes) |
|---------------------|----------------------------------------------------------------------------------------|-------------------------------------------------------------------------------------|---------------------------------------------|-------------------------------------|---------------------------------------------------------|------------------------------------------|-----------------|-------------------------------------|
| Wing 1991           | >20% above ideal above weight                                                          | Behavioral weight loss program with calorie restriction                             | Behavioral marital therapy                  | Spouse                              | Staff and physicians                                    | NR                                       | 5               | 960                                 |
| Brown 2002          | None                                                                                   | Instructional and support group emphasizing nutrition, monitoring and self-care     | NR                                          | Close family member or close friend | Clinicians and community health workers                 | Community                                | 12              | 120                                 |
| Pearce 2008         | A1C>8%                                                                                 | Individualized patient education sessions and newsletters                           | Health belief model                         | Relative or friend                  | Nurse practitioner educator                             | Community and telephone                  | 12              | NR                                  |
| Samuel - Hodge 2009 | No history of ketoacidosis                                                             | Individualized counseling, group education sessions and phone contact               | Behavior change and adult education         | Church community                    | Church diabetes advisor (CDA) and a health professional | Community and telephone                  | 12              | 1140-1500                           |
| Kang 2010           | At least two of last three A1C reading $\geq 7\%$ ; used oral antidiabetic agents only | Individualized counseling, group education sessions and phone contact               | NR                                          | Household family member             | Clinicians and social workers                           | Hospital and telephone                   | 6               | 450                                 |
| Keogh 2011          | 2 out of 3 LAST A1Cs $>8\%$                                                            | Individualized sessions to modify diabetes perceptions and develop action plans     | Self-regulation of health and illness       | Family member                       | Psychologist                                            | Home                                     | 0.75            | 100                                 |
| Toobert 2011        | Latinas                                                                                | Group sessions based on education and problem-solving                               | NR                                          | Family members                      | Group leader                                            | Community                                | NR              | NR                                  |
| Trief 2011          | Married for $>1$ year; A1C $>7.3\%$                                                    | Diabetes education, goal setting, and collaborative problem solving                 | Social learning theory                      | Spouse/partner                      | Diabetes educator and marriage/family therapist         | Telephone                                | 3               | NR                                  |
| Haltiwanger 2012    | $>60$ years old; Mexican American; documented difficulties with health habits          | Diabetes education group sessions                                                   | NR                                          | Spouse                              | Health educator                                         | NR                                       | 2               | 720                                 |
| Khosravizade 2014   | $>30$ years old; medium or low adherence; low social support                           | Individualized education; focus on medication adherence and family support behavior | NR                                          | Household family member             | Researchers                                             | NR                                       | 3               | NR                                  |
| Shaya 2014          | A1C $>7\%$ or FBS $>110$ mg/dl                                                         | Education sessions and team building exercises                                      | Education and medication therapy management | Peers                               | Nurse practitioner educator                             | Community                                | 6               | NR                                  |

|                   |                                                                                        |                                                                                                |                                                                                    |                                      |                                |                               |   |      |
|-------------------|----------------------------------------------------------------------------------------|------------------------------------------------------------------------------------------------|------------------------------------------------------------------------------------|--------------------------------------|--------------------------------|-------------------------------|---|------|
| Sorkin 2014       | Latina; mother to overweight woman                                                     | Group sessions, home visits, and booster phone calls                                           | Lifestyle changes                                                                  | Daughter                             | Lifestyle community coach      | Community, home and telephone | 4 | NR   |
| Greene 2015       | African American                                                                       | Diabetes self-management education                                                             | NR                                                                                 | Household family member or companion | Unclear                        | NR                            | 2 | 3120 |
| Baig 2015         | Diagnosis of diabetes by a physician                                                   | Group education classes focused on nutrition, physical activity and behavioral problem solving | Social cognitive theory, the transtheoretical model, and self-determination theory | Church community                     | Lay leaders                    | Community                     | 2 | 720  |
| Kasteleyn 2015    | >35 years old; within 2 weeks from hospital discharge after first acute coronary event | Home visits with individualized education sessions                                             | Self-efficacy                                                                      | Spouse/partner                       | Diabetes Nurse practitioner    | Home                          | 2 | 155  |
| Trief 2016        | Married or with partner for >1 year; A1C>7.5%                                          | Telephone calls with education and behavioral strategies with spouse                           | Interdependence theory and social learning theory                                  | Spouse/partner                       | Diabetes educator or counselor | Telephone                     | 3 | 720  |
| McEwen 2017       | Mexican American                                                                       | Family-based T2DM social support intervention                                                  | Family social capital                                                              | Family member                        | NR                             | NR                            | 3 | NR   |
| Samuel-Hodge 2017 | African American; overweight or obese; A1C ≤11%                                        | Group-based sessions focusing on group sharing and problem solving                             | Social interdependence and social support theories                                 | Family member                        | Registered dietitians          | University                    | 5 | 2400 |
| Wichit 2017       | ≥35 years old; T2DM duration of ≥6 months and living in Thachang District, Thailand    | Group-based education sessions using workbooks                                                 | Self-efficacy theory                                                               | Household family member              | Registered nurse               | Diabetes clinic               | 3 | 360  |

**Table 1.** Trial and intervention characteristics

diabetes and a history of an acute coronary event;<sup>30</sup> one required participants to also have uncontrolled hypertension,<sup>43</sup> and another enrolled only patients that were overweight or obese.<sup>33</sup> Two trials only enrolled women.<sup>25 28</sup>

### 3.3 Risk of bias and confidence in the body of evidence

The overall risk of bias was judged to be moderate for all outcomes (**Supplemental Figure S1, Table S3**). Allocation concealment and blinding of outcome assessor were often unclear; some studies lost up to one third of participants to follow-up. Outcome reporting was deemed complete for most trials. When considering the body of evidence, unexplained inconsistency in results across RCTs further reduced confidence in the overall results, particularly for the social support outcome.

### 3.4 Meta-analysis

#### 3.4.1 Self-reported outcomes

After pooling the results from the 7 RCTs reporting social support (829 total participants), we found a large increase in self-reported social support, SDM 0.88 (95% CI, 0.40 to 1.36), with high inconsistency in results across trials ( $I^2=90\%$ ) (**Figure 4**). Inconsistency remained unexplained after subgroup analyses (**Supplemental table S4**).

Both wellbeing and self-rated health (with mental and physical score components) scales assessed quality of life. When pooled, neither well-being scales (2 trials, 282 participants; SMD 0.62 [95% CI, -0.13 to 1.37],  $I^2=91\%$ ) nor the physical (4 trials, 524 participants; SMD 0.07 [95% CI, -0.10 to 0.24],  $I^2=0\%$ ) and mental (4 trials, 524 participants; SMD 0.01 [95% CI, -0.18 to 0.20],  $I^2=14\%$ ) self-rated health measures showed significant improvements (**Figure 4**). One trial assessed the burden of treatment<sup>38</sup> using the 17-item Diabetes Distress scale<sup>44</sup> and found that the intervention group reported lower treatment burden than the control.

#### 3.4.2 Biomedical outcomes

When pooled, the 8 trials reporting HbA1c at 3 months, showed significant lowering (924 participants; mean difference (MD) -0.23 [95% CI, -0.38 to -0.08]) with minimal inconsistency

1  
2  
3 across trials ( $I^2=12\%$ ). No significant differences in HbA1c were evident at 6 months (10 trials,  
4 1347 participants; MD -0.27 [95% CI, -0.56 to 0.02],  $I^2=84\%$ ) (**Supplemental figure S2**), >7  
5  
6 months after baseline (3 trials, 674 participants; MD -0.10 [95% CI, -0.84 to 0.64],  $I^2=99\%$ )  
7  
8 (**Supplemental figure S3**), or when considering the HbA1c available at the point of longest  
9  
10 follow-up (16 trials, 2025 participants; MD -0.17 [95% CI, -0.34 to 0.00],  $I^2=50\%$ ) with  
11  
12 moderate to high inconsistency across trials at all time-points (**Figure 4**). Subgroup analyses did  
13  
14 not reveal important interactions (**Supplemental table S4**).  
15  
16  
17  
18

## 19 20 4. DISCUSSION AND CONCLUSION

### 21 22 4.1 Discussion

#### 23 24 4.1.1 Summary of findings

25  
26 We uncovered a nascent body of evidence, small, sparse, and heterogeneous, at  
27  
28 moderate risk of bias, reporting favorable effects on social support and short-term HbA1c and no  
29  
30 significant effect on quality of life of social network interventions in patients with type 2  
31  
32 diabetes. Only one trial evaluated treatment burden directly, and its findings are broadly  
33  
34 consistent with our logic model (**Figure 1**) suggesting benefit of interventions to promote social  
35  
36 network support in patients with type 2 diabetes.  
37  
38  
39  
40  
41

#### 42 4.1.2 Comparisons with Previous Studies

43  
44 To our knowledge, we provide the first meta-analysis of the effects of social network  
45  
46 interventions in the management of type 2 diabetes. In concordance with the findings of a  
47  
48 previous systematic review on social support in diabetes, studies were highly heterogeneous in  
49  
50 their intervention components with limited details reported about these interventions.<sup>45</sup> A recent  
51  
52 meta-synthesis of qualitative literature reports that some group-based initiatives use  
53  
54 individualistic rather than social approaches.<sup>4</sup> This is reflected in our findings; seven trials  
55  
56  
57  
58  
59  
60



1  
2  
3 reported the underlying framework for their social network intervention to be based on  
4  
5 individualistic theories such as self-efficacy and self-regulation. Similarly, only one intervention  
6  
7 employed all aspects of social support identified in diabetes management (**Figure 3**).  
8  
9

#### 10 ***4.1.3 Strengths and Limitations of this Review***

11  
12 Our search strategy was designed to balance rigor with feasibility; thus, it may have  
13  
14 missed reports which did not mention the social support component of the intervention in the  
15  
16 title or abstract. We may have overestimated the risk of bias of these RCTs because of their  
17  
18 unclear reporting of trial methods.<sup>46</sup> When seen as a review of an evolving field in its infancy, its  
19  
20 limitations apply almost exclusively to the meta-analytical portion of the systematic review: the  
21  
22 heterogeneity of methods and results, while informative, questions the wisdom of pooling. We  
23  
24 could not assess for publication bias; our results could represent an overly sanguine view of the  
25  
26 possibilities associated with social network interventions.  
27  
28  
29  
30

31  
32 Conversely, our review has several strengths, such as a thorough search and reproducible  
33  
34 judgments about inclusion, and network and intervention classifications. Pooling was followed  
35  
36 by a parsimonious set of exploratory pre-specified subgroup analyses to explore inconsistency in  
37  
38 results across RCTs. Overall, we are confident we represent here the emerging body of evidence  
39  
40 about interventions directed at social networks in support of patients with type 2 diabetes.  
41  
42

#### 43 ***4.2 Implications for Research and Practice***

44  
45  
46 Future research should clearly identify and report the explanatory frameworks,  
47  
48 mechanisms, and theories for the social network interventions being tested. Ideally, the theory  
49  
50 should be social and predict the impact of social network interventions on care and outcomes.  
51  
52

53 A recent meta-analysis reported decreased mortality in persons with higher social  
54  
55 support.<sup>47</sup> Studies in patients with diabetes<sup>48</sup> and older adults<sup>49</sup> have found social support to be  
56  
57  
58  
59  
60

1  
2  
3 predictive of morbidity and mortality, after adjusting for differences in health behaviors.  
4  
5 Proposed mechanisms for the protective effects include modulation of physiologic stress  
6  
7 responses.<sup>50-52</sup> Emerging literature also highlights network composition (type and number  
8  
9 relationships rather than quality of relationships) as important for health and self-management.<sup>49</sup>  
10  
11 <sup>53</sup> Social networks can affect diabetes self-management by impacting the workload patients must  
12  
13 enact by providing opportunities to share knowledge and by facilitating access to resources.<sup>7</sup> In  
14  
15 turn, access to these networks requires patients to work to be aware and to deal with network  
16  
17 relationships.<sup>7</sup> The effects on workload are likely to interact with the theory of physiological  
18  
19 stress modulation, as access to healthcare and changes in self-efficacy affect psychosocial stress.  
20  
21 This is especially pertinent for people with limited access to formal health care; they may be  
22  
23 more likely to present to care with higher allostatic load and to depend critically on personal  
24  
25 social networks.<sup>4,7</sup> Therefore, the effects of involving social networks in diabetes management on  
26  
27 intermediate outcomes such as *allostatic load*, treatment workload and treatment burden should  
28  
29 be tested in future randomized trials to uncover the impact of social support on these and on  
30  
31 health outcomes apparent in observational studies.  
32  
33  
34  
35  
36  
37

38  
39 Although it may be premature to translate this evidence into practice, the preceding  
40  
41 observational and qualitative research and the evolving experimental research summarized here  
42  
43 suggest an important but underexploited role for social networks in supporting the work patients  
44  
45 do to manage type 2 diabetes. Care approaches that consider social networks as targets of  
46  
47 interventions, as mediators of knowledge and access to resources and which help patients to deal  
48  
49 with network relationships may prove more valuable than interventions supporting self-  
50  
51 management alone. Such promise awaits further development and evaluation.  
52  
53  
54

### 55 **4.3 Conclusion**

56  
57  
58  
59  
60

1  
2  
3  
4  
5  
6  
7  
8  
9  
10  
11  
12  
13  
14  
15  
16  
17  
18  
19  
20  
21  
22  
23  
24  
25  
26  
27  
28  
29  
30  
31  
32  
33  
34  
35  
36  
37  
38  
39  
40  
41  
42  
43  
44  
45  
46  
47  
48  
49  
50  
51  
52  
53  
54  
55  
56  
57  
58  
59  
60

Despite a compelling theoretical base, researchers have barely studied the value of interventions targeting patient social networks on diabetes care. The body of evidence to date is limited at moderate risk of bias, heterogeneous, with inconsistent results, and based on individualistic theories. The results, however, are promising. This review challenges the scientific community to design and test theory-based interventions that go beyond self-management approaches to focus on the largely untapped potential of social networks to improve diabetes care.

For peer review only

1  
2  
3 **Funding:** GS-B was supported by CTSA Grant Number TL1TR000137 from the National  
4  
5 Center for Advancing Translational Science (NCATS) and grant number 3R01HL131535-01S1  
6  
7  
8 from the National Heart Lung and Blood Institute (NHLBI). VMM was partially supported by  
9  
10 Grant Number UL1TR000135 from the National Center for Advancing Translational Science  
11  
12 (NCATS), a component of the National Institutes of Health (NIH). Its contents are solely the  
13  
14 responsibility of the author and do not necessarily represent the official view of the NIH. The  
15  
16 funder had no role in study design, data collection, data analysis, data interpretation, or writing  
17  
18 of the report.  
19  
20  
21

22  
23 **Author contributions:** GS-B, OJP, PJE, RR-G and VMM designed the protocol. GS-B and PJE  
24  
25 searched the literature; GS-B, OJP, and RR-G extracted the data. GS-B, NA-V and VMM  
26  
27 analyzed the data. GS-B, OJP, RR-G, NA-V, PJE, LL-M, AR and VMM interpreted the data  
28  
29 and critically revised the report.  
30  
31  
32

33 **Conflicts of Interest Disclosure:** No competing financial interests exist.  
34  
35

36 **Availability of data and material:** Datasets used and/or analyzed during the current study  
37  
38 available from the corresponding author on reasonable request.  
39  
40  
41  
42  
43  
44  
45  
46  
47  
48  
49  
50  
51  
52  
53  
54  
55  
56  
57  
58  
59  
60

1  
2  
3  
4  
5  
6  
7  
8  
9  
10  
11  
12  
13  
14  
15  
16  
17  
18  
19  
20  
21  
22  
23  
24  
25  
26  
27  
28  
29  
30  
31  
32  
33  
34  
35  
36  
37  
38  
39  
40  
41  
42  
43  
44  
45  
46  
47  
48  
49  
50  
51  
52  
53  
54  
55  
56  
57  
58  
59  
60  
**REFERENCES**

1. Shippee ND, Shah ND, May CR, et al. Cumulative complexity: a functional, patient-centered model of patient complexity can improve research and practice. *Journal of Clinical Epidemiology* 2012;65(10):1041-51. doi: <http://dx.doi.org/10.1016/j.jclinepi.2012.05.005>
2. Eton DT, Yost KJ, Lai JS, et al. Development and validation of the Patient Experience with Treatment and Self-management (PETS): a patient-reported measure of treatment burden. *Qual Life Res* 2016 doi: 10.1007/s11136-016-1397-0
3. Ong BN, Rogers A, Kennedy A, et al. Behaviour change and social blinkers? The role of sociology in trials of self-management behaviour in chronic conditions. *Sociol Health Illn* 2014;36(2):226-38. doi: 10.1111/1467-9566.12113
4. Foss C, Knutsen I, Kennedy A, et al. Connectivity, contest and the ties of self-management support for type 2 diabetes: a meta-synthesis of qualitative literature. *Health Soc Care Community* 2015 doi: 10.1111/hsc.12272 [published Online First: 2015/10/03]
5. Soto SC, Louie SY, Cherrington AL, et al. An ecological perspective on diabetes self-care support, self-management behaviors, and hemoglobin A1C among Latinos. *Diabetes Educ* 2015;41(2):214-23. doi: 10.1177/0145721715569078 [published Online First: 2015/02/07]
6. Strom JL, Egede LE. The Impact of Social Support on Outcomes in Adult Patients with Type 2 Diabetes: A Systematic Review. *Curr Diab Rep* 2012;12(6):769-81. doi: 10.1007/s11892-012-0317-0
7. Vassilev I, Rogers A, Kennedy A, et al. The influence of social networks on self-management support: a metasynthesis. *BMC Public Health* 2014;14:719. doi: 10.1186/1471-2458-14-719 [published Online First: 2014/07/16]

- 1  
2  
3 8. Swartz MK. The PRISMA statement: a guideline for systematic reviews and meta-analyses. *J*  
4  
5 *Pediatr Health Care* 2011;25(1):1-2. doi: 10.1016/j.pedhc.2010.09.006 [published Online  
6  
7 First: 2010/12/15]
- 8  
9  
10 9. Spencer Bonilla G, Rodriguez-Gutierrez R, Ponce O, et al. Social network interventions in the  
11  
12 management of type 2 diabetes: a systematic review and meta-analysis of randomized  
13  
14 trials. PROSPERO 2016:CRD42016036117 Available from  
15  
16 [http://www.crd.york.ac.uk/PROSPERO/display\\_record.asp?ID=CRD42016036117](http://www.crd.york.ac.uk/PROSPERO/display_record.asp?ID=CRD42016036117).  
17  
18
- 19  
20 10. Rogers A, Vassilev I, Sanders C, et al. Social networks, work and network-based resources  
21  
22 for the management of long-term conditions: a framework and study protocol for  
23  
24 developing self-care support. *Implement Sci* 2011;6:56. doi: 10.1186/1748-5908-6-56  
25  
26 [published Online First: 2011/05/31]
- 27  
28  
29 11. Hogan BE, Linden W, Najarian B. Social support interventions: do they work? *Clin Psychol*  
30  
31 *Rev* 2002;22(3):383-442. [published Online First: 2007/01/05]
- 32  
33  
34 12. McGinn T, Wyer PC, Newman TB, et al. Tips for learners of evidence-based medicine: 3.  
35  
36 Measures of observer variability (kappa statistic). *Cmaj* 2004;171(11):1369-73. doi:  
37  
38 10.1503/cmaj.1031981 [published Online First: 2004/11/24]
- 39  
40  
41 13. Kamath CC, Vickers KS, Ehrlich A, et al. Clinical review: behavioral interventions to  
42  
43 prevent childhood obesity: a systematic review and metaanalyses of randomized trials. *J*  
44  
45 *Clin Endocrinol Metab* 2008;93(12):4606-15. doi: 10.1210/jc.2006-2411 [published  
46  
47 Online First: 2008/09/11]
- 48  
49  
50 14. Higgins JP, Altman DG, Gotzsche PC, et al. The Cochrane Collaboration's tool for assessing  
51  
52 risk of bias in randomised trials. *BMJ* 2011;343:d5928. doi: 10.1136/bmj.d5928  
53  
54 [published Online First: 2011/10/20]
- 55  
56  
57  
58  
59  
60

- 1  
2  
3  
4  
5  
6  
7  
8  
9  
10  
11  
12  
13  
14  
15  
16  
17  
18  
19  
20  
21  
22  
23  
24  
25  
26  
27  
28  
29  
30  
31  
32  
33  
34  
35  
36  
37  
38  
39  
40  
41  
42  
43  
44  
45  
46  
47  
48  
49  
50  
51  
52  
53  
54  
55  
56  
57  
58  
59  
60
15. Pawson R, Greenhalgh T, Harvey G, et al. Realist review--a new method of systematic review designed for complex policy interventions. *J Health Serv Res Policy* 2005;10 Suppl 1:21-34. doi: 10.1258/1355819054308530 [published Online First: 2005/08/02]
  16. Guyatt G, Oxman AD, Sultan S, et al. GRADE guidelines: 11. Making an overall rating of confidence in effect estimates for a single outcome and for all outcomes. *Journal of clinical epidemiology* 2013;66(2):151-7. doi: 10.1016/j.jclinepi.2012.01.006 [published Online First: 2012/05/01]
  17. Review Manager (RevMan) [Computer program] . Version 5.3. *Copenhagen: The Nordic Cochrane Centre* 2014(The Cochrane Collaboration)
  18. Cohen J. Statistical Power Analysis for the Behavioral Sciences. *Hillsdale, NJ; Erlbaum* 1988;Second Edition
  19. Higgins JP, Thompson SG, Deeks JJ, et al. Measuring inconsistency in meta-analyses. *BMJ* 2003;327(7414):557-60. doi: 10.1136/bmj.327.7414.557 [published Online First: 2003/09/06]
  20. Wing RR, Marcus MD, Epstein LH, et al. A "family-based" approach to the treatment of obese type II diabetic patients. *J Consult Clin Psychol* 1991;59(1):156-62. [published Online First: 1991/02/01]
  21. Brown SA, Garcia AA, Kouzekanani K, et al. Culturally competent diabetes self-management education for Mexican Americans: the Starr County border health initiative. *Diabetes Care* 2002;25(2):259-68. [published Online First: 2002/01/30]
  22. Kang CM, Chang SC, Chen PL, et al. Comparison of family partnership intervention care vs. conventional care in adult patients with poorly controlled type 2 diabetes in a community

- 1  
2  
3 hospital: a randomized controlled trial. *Int J Nurs Stud* 2010;47(11):1363-73. doi:  
4  
5 <http://dx.doi.org/10.1016/j.ijnurstu.2010.03.009>  
6  
7  
8 23. Keogh KM, Smith SM, White P, et al. Psychological family intervention for poorly  
9  
10 controlled type 2 diabetes. *American Journal of Managed Care* 2011;17(2):105-13.  
11  
12 24. Trief P, Sandberg JG, Ploutz-Snyder R, et al. Promoting couples collaboration in type 2  
13  
14 diabetes: the diabetes support project pilot data. *Fam Syst Health* 2011;29(3):253-61. doi:  
15  
16 <http://dx.doi.org/10.1037/a0024564>  
17  
18  
19 25. Toobert DJ, Strycker LA, King DK, et al. Long-term outcomes from a multiple-risk-factor  
20  
21 diabetes trial for Latinas: Viva Bien! *Translational Behavioral Medicine* 2011;1(3):416-  
22  
23 26. doi: <http://dx.doi.org/10.1007/s13142-010-0011-1>  
24  
25  
26 26. Haltiwanger EP, Brutus H. A Culturally Sensitive Diabetes Peer Support for Older Mexican-  
27  
28 Americans. *Occupational Therapy International* 2012;19(2):67-75 9p. doi:  
29  
30 10.1002/oti.320  
31  
32  
33 27. Shaya FT, Chirikov VV, Howard D, et al. Effect of social networks intervention in type 2  
34  
35 diabetes: a partial randomised study. *Journal of Epidemiology & Community Health*  
36  
37 2014;68(4):326-32. doi: <http://dx.doi.org/10.1136/jech-2013-203274>  
38  
39  
40 28. Sorkin DH, Mavandadi S, Rook KS, et al. Dyadic collaboration in shared health behavior  
41  
42 change: the effects of a randomized trial to test a lifestyle intervention for high-risk  
43  
44 Latinas. *Health Psychology* 2014;33(6):566-75. doi:  
45  
46 <http://dx.doi.org/10.1037/hea0000063>  
47  
48  
49 29. Khosravizade Tabasi H, Madarshahian F, Khoshniat Nikoo M, et al. Impact of family  
50  
51 support improvement behaviors on anti diabetic medication adherence and cognition in  
52  
53  
54  
55  
56  
57  
58  
59  
60



- 1  
2  
3 type 2 diabetic patients. *J* 2014;13(1):113. doi: [http://dx.doi.org/10.1186/s40200-014-](http://dx.doi.org/10.1186/s40200-014-0113-2)  
4  
5 [0113-2](http://dx.doi.org/10.1186/s40200-014-0113-2)  
6  
7  
8 30. Kasteleyn MJ, Vos RC, Rutten GEH. Tailored support for type 2 diabetes patients with a first  
9 acute coronary event after discharge from hospital: Results of a RCT in primary care.  
10  
11 *Diabetologia* 2014;1):S442. doi: <http://dx.doi.org/10.1007/s00125-014-3355-0>  
12  
13  
14  
15 31. Trief PM, Fisher L, Sandberg J, et al. A couples intervention for type 2 diabetes: Diabetes  
16 support project. *Diabetes* 2015;64(5):A215.  
17  
18  
19  
20 32. Greene N, Eaton S, Hoag J. Effect of family-focused dsme on physiological outcomes in  
21 african americans with type 2 diabetes. *Diabetes* 2015;64(5):A54.  
22  
23  
24  
25 33. Samuel-Hodge CD, Holder-Cooper JC, Gizlice Z, et al. Family PArtners in Lifestyle Support  
26 (PALS): Family-based weight loss for African American adults with type 2 diabetes.  
27  
28 *Obesity (Silver Spring)* 2017;25(1):45-55. doi: 10.1002/oby.21700  
29  
30  
31  
32 34. Wichit N, Mnatzaganian G, Courtney M, et al. Randomized controlled trial of a family-  
33 oriented self-management program to improve self-efficacy, glycemic control and quality  
34 of life among Thai individuals with Type 2 diabetes. *Diabetes Res Clin Pract*  
35  
36  
37  
38  
39  
40  
41 35. Baig AA, Benitez A, Locklin CA, et al. Picture Good Health: A Church-Based Self-  
42 Management Intervention Among Latino Adults with Diabetes. *J Gen Intern Med*  
43  
44  
45  
46  
47  
48  
49 36. Baig AA, Benitez A, Locklin CA, et al. Picture Good Health: A Church-Based Self-  
50 Management Intervention Among Latino Adults with Diabetes. *J Gen Intern Med*  
51  
52  
53  
54  
55  
56  
57  
58  
59  
60

- 1  
2  
3  
4  
5  
6  
7  
8  
9  
10  
11  
12  
13  
14  
15  
16  
17  
18  
19  
20  
21  
22  
23  
24  
25  
26  
27  
28  
29  
30  
31  
32  
33  
34  
35  
36  
37  
38  
39  
40  
41  
42  
43  
44  
45  
46  
47  
48  
49  
50  
51  
52  
53  
54  
55  
56  
57  
58  
59  
60
37. Samuel-Hodge CD, Holder-Cooper JC, Gizlice Z, et al. Family PARTners in Lifestyle Support (PALS): family-based weight loss for African American adults with type 2 diabetes. *Obesity (silver spring, md)* 2017;25(1):45-55.
38. Trief PM, Fisher L, Sandberg J, et al. Health and psychosocial outcomes of a telephonic couples behavior change intervention in patients with poorly controlled type 2 diabetes: a randomized clinical trial. *Diabetes Care* 2016;39(12):2165-73.
39. Wichit N, Mnatzaganian G, Courtney M, et al. Randomized controlled trial of a family-oriented self-management program to improve self-efficacy, glycemic control and quality of life among Thai individuals with Type 2 diabetes. *Diabetes Res Clin Pract* 2017;123:37-48. doi: <https://dx.doi.org/10.1016/j.diabres.2016.11.013>
40. McEwen MM, Pasvogel A, Murdaugh C, et al. 5. Effects of a Family Intervention to Promote Mexican American Family Social Capital for Diabetes Management. *Nursing Outlook* 2017;65(1):132-32. doi: 10.1016/j.outlook.2016.11.011
41. Pearce KAL, M. M.;Shelton, B. J.;Schoenberg, N. E.;Williamson, M. A.;Barron, M. A.;Houlihan, J. M.;Kentucky Ambulatory, Network. Cardiovascular risk education and social support (CaRESS): report of a randomized controlled trial from the Kentucky Ambulatory Network (KAN). *J Am Board Fam Med* 2008;21(4):269-81. doi: <http://dx.doi.org/10.3122/jabfm.2008.04.080007>
42. Samuel-Hodge CD, Keyserling TC, Park S, et al. A randomized trial of a church-based diabetes self-management program for African Americans with type 2 diabetes. *Diabetes Educator* 2009;35(3):439-54. doi: <http://dx.doi.org/10.1177/0145721709333270>
43. Pearce KA, Love MM, Shelton BJ, et al. Cardiovascular risk education and social support (CaRESS): report of a randomized controlled trial from the Kentucky Ambulatory

- 1  
2  
3 Network (KAN). *J Am Board Fam Med* 2008;21(4):269-81. doi:  
4 <http://dx.doi.org/10.3122/jabfm.2008.04.080007>  
5  
6  
7  
8 44. Polonsky WH, Fisher L, Earles J, et al. Assessing psychosocial distress in diabetes:  
9 development of the diabetes distress scale. *Diabetes Care* 2005;28(3):626-31.  
10  
11  
12 45. van Dam HA, van der Horst FG, Knoops L, et al. Social support in diabetes: a systematic  
13 review of controlled intervention studies. *Patient Educ Couns* 2005;59(1):1-12. doi:  
14 10.1016/j.pec.2004.11.001 [published Online First: 2005/10/04]  
15  
16  
17  
18 46. Devereaux PJ, Choi PT, El-Dika S, et al. An observational study found that authors of  
19 randomized controlled trials frequently use concealment of randomization and blinding,  
20 despite the failure to report these methods. *Journal of clinical epidemiology*  
21 2004;57(12):1232-6. doi: 10.1016/j.jclinepi.2004.03.017 [published Online First:  
22 2004/12/25]  
23  
24  
25  
26  
27  
28  
29  
30  
31 47. Shor E, Roelfs DJ, Yogeve T. The strength of family ties: A meta-analysis and meta-  
32 regression of self-reported social support and mortality. *Social Networks* 2013;35(4):626-  
33 38. doi: <http://dx.doi.org/10.1016/j.socnet.2013.08.004>  
34  
35  
36  
37  
38 48. Zhang XP, Norris SL, Gregg EW, et al. Social support and mortality among older persons  
39 with diabetes. *Diabetes Educator* 2007;33(2):273-81. doi: 10.1177/0145721707299265  
40  
41  
42  
43 49. Ellwardt L, van Tilburg T, Aartsen M, et al. Personal networks and mortality risk in older  
44 adults: a twenty-year longitudinal study. *PLoS One* 2015;10(3):e0116731. doi:  
45 10.1371/journal.pone.0116731  
46  
47  
48  
49  
50 50. Steptoe A, Owen N, Kunz-Ebrecht SR, et al. Loneliness and neuroendocrine, cardiovascular,  
51 and inflammatory stress responses in middle-aged men and women.  
52  
53  
54  
55  
56  
57  
58  
59  
60

- 1  
2  
3 51. Steptoe A, Hackett RA, Lazzarino AI, et al. Disruption of multisystem responses to stress in  
4  
5 type 2 diabetes: investigating the dynamics of allostatic load. *Proc Natl Acad Sci U S A*  
6  
7 2014;111(44):15693-8. doi: 10.1073/pnas.1410401111 [published Online First:  
8  
9 2014/10/22]  
10  
11  
12 52. Marmot M, Wilkinson R. Social determinants of health: Oxford University Press 2005.  
13  
14 53. Vassilev I, Rogers A, Kennedy A, et al. Social network type and long-term condition  
15  
16 management support: A cross-sectional study in six European countries. *PLoS ONE*  
17  
18 2016;11 (8):e0161027. doi: <http://dx.doi.org/10.1371/journal.pone.0161027>  
19  
20  
21  
22  
23  
24  
25  
26  
27  
28  
29

## 30 **Tables and Figures**

31  
32  
33  
34 **Figure 1.** Logic model of social self-management  
35

36  
37 **Figure 2.** PRISMA flow chart  
38

39  
40 **Figure 3.** Intervention and comparator components  
41

42  
43  
44 **Figure 4.** Effect of social network interventions on social support, quality of life (QoL) and  
45 HbA1c  
46

47 **Table 1.** Trial and intervention characteristics  
48  
49  
50  
51  
52  
53  
54  
55  
56  
57  
58  
59  
60

1  
2  
3  
4  
5  
6  
7  
8  
9  
10  
11  
12  
13  
14  
15  
16  
17  
18  
19  
20  
21  
22  
23  
24  
25  
26  
27  
28  
29  
30  
31  
32  
33  
34  
35  
36  
37  
38  
39  
40  
41  
42  
43  
44  
45  
46  
47  
48  
49  
50  
51  
52  
53  
54  
55  
56  
57  
58  
59  
60

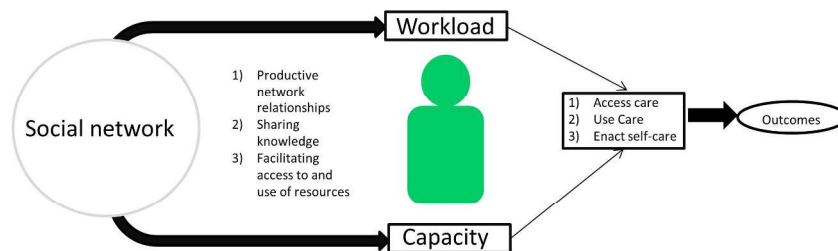

Figure 1. Logic Model of Social Self-management

Figure1. Logic model of social self-management

254x190mm (300 x 300 DPI)

ew only

1  
2  
3  
4  
5  
6  
7  
8  
9  
10  
11  
12  
13  
14  
15  
16  
17  
18  
19  
20  
21  
22  
23  
24  
25  
26  
27  
28  
29  
30  
31  
32  
33  
34  
35  
36  
37  
38  
39  
40  
41  
42  
43  
44  
45  
46  
47  
48  
49  
50  
51  
52  
53  
54  
55  
56  
57  
58  
59  
60

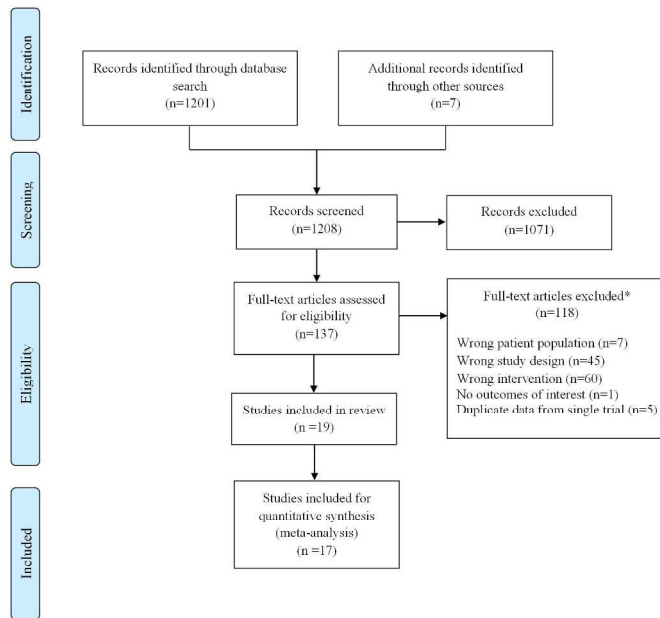

Figure 2. PRISMA flow chart.  
\*reasons not mutually exclusive

Figure 2. PRISMA flow chart

254x190mm (300 x 300 DPI)

ew only

1  
2  
3  
4  
5  
6  
7  
8  
9  
10  
11  
12  
13  
14  
15  
16  
17  
18  
19  
20  
21  
22  
23  
24  
25  
26  
27  
28  
29  
30  
31  
32  
33  
34  
35  
36  
37  
38  
39  
40  
41  
42  
43  
44  
45  
46  
47  
48  
49  
50  
51  
52  
53  
54  
55  
56  
57  
58  
59  
60

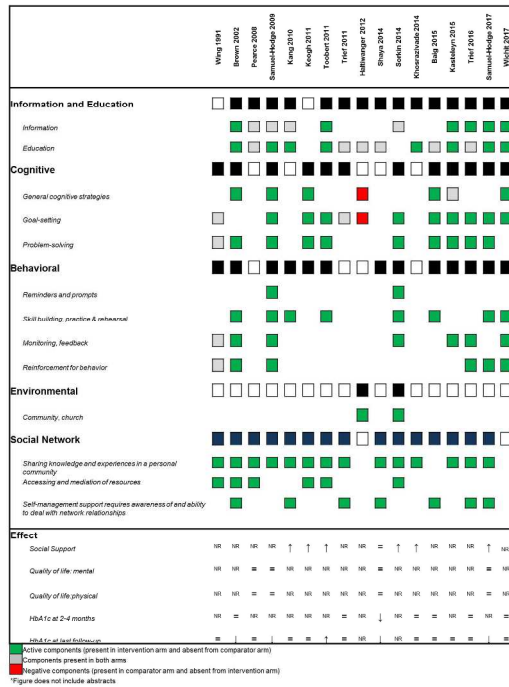

Figure 3. Intervention and comparator components

Figure 3. Intervention and comparator components

254x190mm (300 x 300 DPI)

1  
2  
3  
4  
5  
6  
7  
8  
9  
10  
11  
12  
13  
14  
15  
16  
17  
18  
19  
20  
21  
22  
23  
24  
25  
26  
27  
28  
29  
30  
31  
32  
33  
34  
35  
36  
37  
38  
39  
40  
41  
42  
43  
44  
45  
46  
47  
48  
49  
50  
51  
52  
53  
54  
55  
56  
57  
58  
59  
60

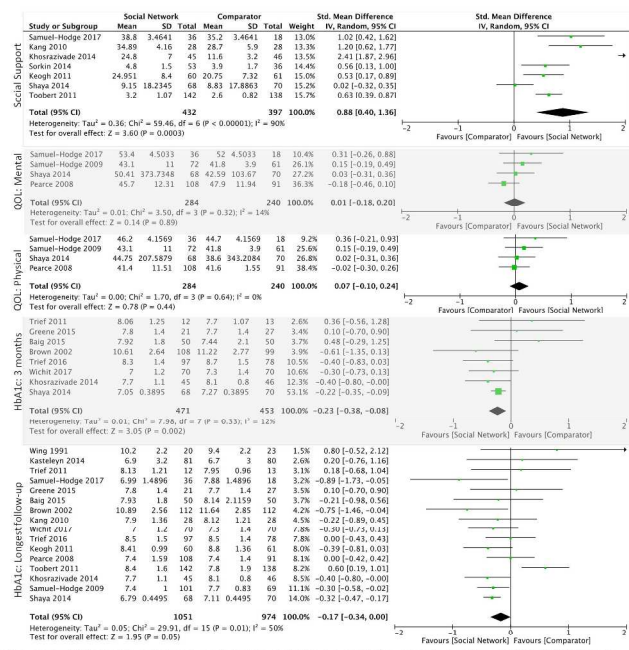

Figure 4. Effect of social network interventions on social support, quality of life (QoL) and HbA1c

Figure 4. Effect of social network interventions on social support, quality of life (QoL), and HbA1c

254x190mm (300 x 300 DPI)



1  
2  
3  
4  
5  
6  
7  
8  
9  
10  
11  
12  
13  
14  
15  
16  
17  
18  
19  
20  
21  
22  
23  
24  
25  
26  
27  
28  
29  
30  
31  
32  
33  
34  
35  
36  
37  
38  
39  
40  
41  
42  
43  
44  
45  
46  
47  
48  
49  
50  
51  
52  
53  
54  
55  
56  
57  
58  
59  
60

**Supplemental Material**

**A systematic review of social network interventions in patients with type 2 diabetes**

## Ovid MEDLINE(R) In-Process &amp; Other Non-Indexed Citations and Ovid MEDLINE(R) 1946 to Present

|    |   |                                                                                                                                                                                                                                                                                                |          |
|----|---|------------------------------------------------------------------------------------------------------------------------------------------------------------------------------------------------------------------------------------------------------------------------------------------------|----------|
| 1  |   |                                                                                                                                                                                                                                                                                                |          |
| 2  |   |                                                                                                                                                                                                                                                                                                |          |
| 3  |   |                                                                                                                                                                                                                                                                                                |          |
| 4  |   |                                                                                                                                                                                                                                                                                                |          |
| 5  |   |                                                                                                                                                                                                                                                                                                |          |
| 6  |   |                                                                                                                                                                                                                                                                                                |          |
| 7  | 1 | *diabetes mellitus, type 2/ or "type 2 diabet*".tw. or niddm.mp. or t2dm.mp. [mp=title, abstract, original title, name of substance word, subject heading word, keyword heading word, protocol supplementary concept word, rare disease supplementary concept word, unique identifier]         | 114218   |
| 8  |   |                                                                                                                                                                                                                                                                                                | Advanced |
| 9  |   |                                                                                                                                                                                                                                                                                                |          |
| 10 |   |                                                                                                                                                                                                                                                                                                |          |
| 11 |   |                                                                                                                                                                                                                                                                                                |          |
| 12 |   |                                                                                                                                                                                                                                                                                                |          |
| 13 | 2 | ("social network" or "social support").mp. [mp=title, abstract, original title, name of substance word, subject heading word, keyword heading word, protocol supplementary concept word, rare disease supplementary concept word, unique identifier]                                           | 69042    |
| 14 |   |                                                                                                                                                                                                                                                                                                | Advanced |
| 15 |   |                                                                                                                                                                                                                                                                                                |          |
| 16 |   |                                                                                                                                                                                                                                                                                                |          |
| 17 |   |                                                                                                                                                                                                                                                                                                |          |
| 18 |   |                                                                                                                                                                                                                                                                                                |          |
| 19 | 3 | 1 and 2                                                                                                                                                                                                                                                                                        | 663      |
| 20 |   |                                                                                                                                                                                                                                                                                                | Advanced |
| 21 |   |                                                                                                                                                                                                                                                                                                |          |
| 22 | 4 | family relations/ or family conflict/ or intergenerational relations/ or sibling relations/                                                                                                                                                                                                    | 15431    |
| 23 |   |                                                                                                                                                                                                                                                                                                | Advanced |
| 24 |   |                                                                                                                                                                                                                                                                                                |          |
| 25 | 5 | family/ or adult children/ or family relations/                                                                                                                                                                                                                                                | 73608    |
| 26 |   |                                                                                                                                                                                                                                                                                                | Advanced |
| 27 |   |                                                                                                                                                                                                                                                                                                |          |
| 28 | 6 | family role/ or family therapy/                                                                                                                                                                                                                                                                | 7952     |
| 29 |   |                                                                                                                                                                                                                                                                                                | Advanced |
| 30 |   |                                                                                                                                                                                                                                                                                                |          |
| 31 | 7 | 1 and (4 or 5 or 6)                                                                                                                                                                                                                                                                            | 536      |
| 32 |   |                                                                                                                                                                                                                                                                                                | Advanced |
| 33 | 8 | (couple or couples or married or spous* or partner*1 or household or neighbor*1).mp. [mp=title, abstract, original title, name of substance word, subject heading word, keyword heading word, protocol supplementary concept word, rare disease supplementary concept word, unique identifier] | 231588   |
| 34 |   |                                                                                                                                                                                                                                                                                                | Advanced |
| 35 |   |                                                                                                                                                                                                                                                                                                |          |
| 36 |   |                                                                                                                                                                                                                                                                                                |          |
| 37 |   |                                                                                                                                                                                                                                                                                                |          |
| 38 |   |                                                                                                                                                                                                                                                                                                |          |
| 39 | 9 | (church* or religious* or husband* or wife* or relatives or "family based").mp. [mp=title, abstract, original title, name of substance word, subject heading word, keyword heading word, protocol supplementary concept                                                                        | 110536   |
| 40 |   |                                                                                                                                                                                                                                                                                                | Advanced |
| 41 |   |                                                                                                                                                                                                                                                                                                |          |
| 42 |   |                                                                                                                                                                                                                                                                                                |          |
| 43 |   |                                                                                                                                                                                                                                                                                                |          |
| 44 |   |                                                                                                                                                                                                                                                                                                |          |
| 45 |   |                                                                                                                                                                                                                                                                                                |          |
| 46 |   |                                                                                                                                                                                                                                                                                                |          |
| 47 |   |                                                                                                                                                                                                                                                                                                |          |
| 48 |   |                                                                                                                                                                                                                                                                                                |          |
| 49 |   |                                                                                                                                                                                                                                                                                                |          |

|    |                                                                                                                                                                                                                                                                                             |      |          |
|----|---------------------------------------------------------------------------------------------------------------------------------------------------------------------------------------------------------------------------------------------------------------------------------------------|------|----------|
|    | word, rare disease supplementary concept word, unique identifier]                                                                                                                                                                                                                           |      |          |
| 10 | 1 and 8                                                                                                                                                                                                                                                                                     | 749  | Advanced |
| 11 | 1 and 9                                                                                                                                                                                                                                                                                     | 1089 | Advanced |
| 12 | 7 or 10 or 11                                                                                                                                                                                                                                                                               | 2151 | Advanced |
| 13 | limit 12 to randomized controlled trial                                                                                                                                                                                                                                                     | 87   | Advanced |
| 14 | 12 and intervention*.mp. [mp=title, abstract, original title, name of substance word, subject heading word, keyword heading word, protocol supplementary concept word, rare disease supplementary concept word, unique identifier]                                                          | 290  | Advanced |
| 15 | 12 and (behavior* or behaviour* or adher* or education* or aware* or stigma*).mp. [mp=title, abstract, original title, name of substance word, subject heading word, keyword heading word, protocol supplementary concept word, rare disease supplementary concept word, unique identifier] | 573  | Advanced |
| 16 | 13 or 14                                                                                                                                                                                                                                                                                    | 330  | Advanced |
| 17 | 3 or 7 or 12                                                                                                                                                                                                                                                                                | 2695 | Advanced |
| 18 | intervention*.mp. and 17 [mp=title, abstract, original title, name of substance word, subject heading word, keyword heading word, protocol supplementary concept word, rare disease supplementary concept word, unique identifier]                                                          | 512  | Advanced |
| 19 | 13 or 18                                                                                                                                                                                                                                                                                    | 552  | Advanced |

1  
2  
3  
4  
5  
6  
7  
8  
9  
10  
11  
12  
13  
14  
15  
16  
17  
18  
19  
20  
21  
22  
23  
24  
25  
26  
27  
28  
29  
30  
31  
32  
33  
34  
35  
36  
37  
38  
39  
40  
41  
42  
43  
44  
45  
46  
47  
48  
49

|    |                                                                                                                                                                                                                              |     |          |
|----|------------------------------------------------------------------------------------------------------------------------------------------------------------------------------------------------------------------------------|-----|----------|
| 20 | 17 and random*.mp. [mp=title, abstract, original title, name of substance word, subject heading word, keyword heading word, protocol supplementary concept word, rare disease supplementary concept word, unique identifier] | 338 | Advanced |
| 21 | 19 or 20                                                                                                                                                                                                                     | 676 | Advanced |
| 22 | remove duplicates from 21                                                                                                                                                                                                    | 665 |          |

CENTRAL – same strategy – 205

| Embase 1988 to 2017 Week 16 |                                                                                                                                                                                                                      |         |             |
|-----------------------------|----------------------------------------------------------------------------------------------------------------------------------------------------------------------------------------------------------------------|---------|-------------|
| #                           | Searches                                                                                                                                                                                                             | Results | Search Type |
| 1                           | *diabetes mellitus, type 2/ or "type 2 diabet*".tw. or niddm.mp. or t2dm.mp. [mp=title, abstract, heading word, drug trade name, original title, device manufacturer, drug manufacturer, device trade name, keyword] | 142471  | Advanced    |
| 2                           | ("social network" or "social support").mp. [mp=title, abstract, heading word, drug trade name, original title, device manufacturer, drug manufacturer, device trade name, keyword]                                   | 79400   | Advanced    |
| 3                           | 1 and 2                                                                                                                                                                                                              | 645     | Advanced    |
| 4                           | family relations/ or family conflict/ or intergenerational relations/ or sibling relations/                                                                                                                          | 69298   | Advanced    |

|    |                                                                                                                                                                                                                              |        |          |
|----|------------------------------------------------------------------------------------------------------------------------------------------------------------------------------------------------------------------------------|--------|----------|
| 5  | family/ or adult children/ or family relations/                                                                                                                                                                              | 70584  | Advanced |
| 6  | family role/ or family therapy/                                                                                                                                                                                              | 8709   | Advanced |
| 7  | 1 and (4 or 5 or 6)                                                                                                                                                                                                          | 439    | Advanced |
| 8  | (couple or couples or married or spous* or partner*1 or household or neighbor*1).mp. [mp=title, abstract, heading word, drug trade name, original title, device manufacturer, drug manufacturer, device trade name, keyword] | 265365 | Advanced |
| 9  | (church* or religious* or husband* or wife* or relatives or "family based").mp. [mp=title, abstract, heading word, drug trade name, original title, device manufacturer, drug manufacturer, device trade name, keyword]      | 109824 | Advanced |
| 10 | 1 and 8                                                                                                                                                                                                                      | 1041   | Advanced |
| 11 | 1 and 9                                                                                                                                                                                                                      | 1305   | Advanced |
| 12 | 7 or 10 or 11                                                                                                                                                                                                                | 2620   | Advanced |
| 13 | 3 or 12                                                                                                                                                                                                                      | 3134   | Advanced |
| 14 | 13 and intervention*.mp. [mp=title, abstract, heading word, drug trade name, original title, device manufacturer, drug manufacturer, device trade name, keyword]                                                             | 653    | Advanced |
| 15 | randomized controlled trial/                                                                                                                                                                                                 | 376080 | Advanced |
| 16 | 13 and 15                                                                                                                                                                                                                    | 158    | Advanced |

1  
2  
3  
4  
5  
6  
7  
8  
9  
10  
11  
12  
13  
14  
15  
16  
17  
18  
19  
20  
21  
22  
23  
24  
25  
26  
27  
28  
29  
30  
31  
32  
33  
34  
35  
36  
37  
38  
39  
40  
41  
42  
43  
44  
45  
46  
47  
48  
49

|    |                                                                                                                                                            |        |          |
|----|------------------------------------------------------------------------------------------------------------------------------------------------------------|--------|----------|
| 17 | 13 and random*.mp. [mp=title, abstract, heading word, drug trade name, original title, device manufacturer, drug manufacturer, device trade name, keyword] | 410    | Advanced |
| 18 | 14 or 16 or 17                                                                                                                                             | 847    | Advanced |
| 19 | limit 18 to human                                                                                                                                          | 796    | Advanced |
| 20 | non insulin dependent diabetes mellitus/                                                                                                                   | 166150 | Advanced |
| 21 | 19 and 20                                                                                                                                                  | 665    |          |

**PsycINFO** 1987 to April Week 2 2017

| # | Searches                                                                                                                                                                           | Results | Search Type |
|---|------------------------------------------------------------------------------------------------------------------------------------------------------------------------------------|---------|-------------|
| 1 | diabetes mellitus/                                                                                                                                                                 | 4189    | Advanced    |
| 2 | 1 and ("type 2" or noninsulin* or "non insulin" or niddm or t2d or t2dm).mp. [mp=title, abstract, heading word, table of contents, key concepts, original title, tests & measures] | 1815    | Advanced    |
| 3 | exp social support/                                                                                                                                                                | 26965   | Advanced    |
| 4 | social networks/ or exp social groups/ or exp social interaction/ or exp social support/ or exp support groups/                                                                    | 276211  | Advanced    |
| 5 | 2 and (3 or 4)                                                                                                                                                                     | 90      | Advanced    |

|    |                                                                                                                                            |        |          |
|----|--------------------------------------------------------------------------------------------------------------------------------------------|--------|----------|
| 6  | exp Family Therapy/ or family.mp. or exp Family Relations/ or exp Family/ or exp Family Systems Theory/ or exp Family Structure/           | 282330 | Advanced |
| 7  | couples/ or cohabitation/ or dyads/ or significant others/ or exp spouses/                                                                 | 25371  | Advanced |
| 8  | 2 and (6 or 7)                                                                                                                             | 195    | Advanced |
| 9  | 5 or 8                                                                                                                                     | 258    | Advanced |
| 10 | limit 9 to ("0830 systematic review" or 1200 meta analysis)                                                                                | 1      | Advanced |
| 11 | 9 and (intervention* or random*).mp. [mp=title, abstract, heading word, table of contents, key concepts, original title, tests & measures] | 78     | Advanced |
| 12 | 10 or 11                                                                                                                                   | 79     | Advanced |
| 13 | limit 12 to all journals                                                                                                                   | 55     |          |

## CINAHL

| #   | Query                                                             | Limiters/Expanders            | Last Run Via                                                                                                    | Results |
|-----|-------------------------------------------------------------------|-------------------------------|-----------------------------------------------------------------------------------------------------------------|---------|
| S12 | S8 AND S11                                                        | Search modes - Boolean/Phrase | Interface - EBSCOhost Research Databases<br>Search Screen - Advanced Search<br>Database - CINAHL with Full Text | 9       |
| S11 | S5 AND S10                                                        | Search modes - Boolean/Phrase | Interface - EBSCOhost Research Databases<br>Search Screen - Advanced Search<br>Database - CINAHL with Full Text | 78      |
| S10 | (MH "Family+") OR (MH "Family Relations+") OR (MH "Patient-Family | Search modes - Boolean/Phrase | Interface - EBSCOhost Research Databases<br>Search Screen - Advanced Search                                     | 123,032 |

|    |                                                                                                                                                           |                               |                                                                                                                 |         |
|----|-----------------------------------------------------------------------------------------------------------------------------------------------------------|-------------------------------|-----------------------------------------------------------------------------------------------------------------|---------|
|    | Relations") OR (MH "Nuclear Family+") OR (MH "Family Attitudes+")                                                                                         |                               | Database - CINAHL with Full Text                                                                                |         |
| S9 | S5 AND S8                                                                                                                                                 | Search modes - Boolean/Phrase | Interface - EBSCOhost Research Databases<br>Search Screen - Advanced Search<br>Database - CINAHL with Full Text | 75      |
| S8 | S6 OR S7                                                                                                                                                  | Search modes - Boolean/Phrase | Interface - EBSCOhost Research Databases<br>Search Screen - Advanced Search<br>Database - CINAHL with Full Text | 129,321 |
| S7 | (MH "Intervention Trials") OR "intervention"                                                                                                              | Search modes - Boolean/Phrase | Interface - EBSCOhost Research Databases<br>Search Screen - Advanced Search<br>Database - CINAHL with Full Text | 111,076 |
| S6 | (MH "Randomized Controlled Trials")                                                                                                                       | Search modes - Boolean/Phrase | Interface - EBSCOhost Research Databases<br>Search Screen - Advanced Search<br>Database - CINAHL with Full Text | 25,142  |
| S5 | S1 AND S4                                                                                                                                                 | Search modes - Boolean/Phrase | Interface - EBSCOhost Research Databases<br>Search Screen - Advanced Search<br>Database - CINAHL with Full Text | 385     |
| S4 | S2 OR S3                                                                                                                                                  | Search modes - Boolean/Phrase | Interface - EBSCOhost Research Databases<br>Search Screen - Advanced Search<br>Database - CINAHL with Full Text | 48,947  |
| S3 | (MH "Young Adult Social Support Index") OR (MH "Social Support Index") OR (MH "Social Support (Iowa NOC)") OR (MH "Norbeck Social Support Questionnaire") | Search modes - Boolean/Phrase | Interface - EBSCOhost Research Databases<br>Search Screen - Advanced Search<br>Database - CINAHL with Full Text | 289     |
| S2 | (MH "Social Networks") OR (MH "Social Network Analysis (Saba CCC)") OR (MH "Support, Psychosocial+")                                                      | Search modes - Boolean/Phrase | Interface - EBSCOhost Research Databases<br>Search Screen - Advanced Search<br>Database - CINAHL with Full Text | 48,840  |
| S1 | (MH "Diabetes Mellitus, Type 2")                                                                                                                          | Search modes - Boolean/Phrase | Interface - EBSCOhost Research Databases<br>Search Screen - Advanced Search<br>Database - CINAHL with Full Text | 26,607  |

Supplement Table S1. Search strategy



| Study                | Intervention |                        |                                     | Control |                        |                                     |
|----------------------|--------------|------------------------|-------------------------------------|---------|------------------------|-------------------------------------|
|                      | N            | Mean Age in years (SD) | Mean duration of T2DM in years (SD) | N       | Mean Age in years (SD) | Mean duration of T2DM in years (SD) |
| Wing 1991            | 25           | 53.6 (7.7)             | NR                                  | 24      | 51.2 (7.3)             | NR                                  |
| Brown 2002           | 128          | 54.7 (8.2)             | 7.6 (5.8)                           | 128     | 53.3 (8.3)             | 8.1 (6.9)                           |
| Sammuel - Hodge 2002 | 117          | 57 (9.7)               | 9 (NR)                              | 84      | 61.3 (11.9)            | 11 (NR)                             |
| Pearce 2008          | 108          | 61.2 (10.59)           | NR                                  | 91      | 63.1 (8.63)            | NR                                  |
| Kang 2010            | 33           | 55.3 (7.7)             | 3.8 (3.2)                           | 34      | 51.7 (8.5)             | 4.4 (3)                             |
| Toobert 2011         | 142          | 55.6 (9.7)             | 8.4 (6.5)                           | 138     | 58.7 (10.3)            | 10.4 (9.8)                          |
| Greene 2015          | 21           | NR                     | NR                                  | 27      | NR                     | NR                                  |
| Keogh 2011           | 60           | 59.96 (11.67)          | 9.17 (7.1)                          | 61      | 57.9 (11.34)           | 9.65 (6.45)                         |
| Trief 2011           | 12           | 60.33 (8.63)           | 8.63 (NR)                           | 12      | 61.08 (9.27)           | 9.27 (NR)                           |
| Haltiwanger 2012     | 12           | NR                     | NR                                  | 36      | NR                     | NR                                  |
| Khosravizade 2014    | 45           | 52.93 (7.62)           | 9.71 (6.75)                         | 46      | 54.13 (7.56)           | 11.39 (5.4)                         |
| Shaya 2014           | 68           | 53.9 (NR)              | 9.2 (8.6)                           | 70      | 51.9 (NR)              | 8.8 (8.2)                           |
| Sorkin 2014          | 53           | 52.7 (6.9)             | 9.8 (NR)                            | 36      | 52.7 (6.9)             | 9.8 (NR)                            |
| Baig 2015            | 50           | 51.7 (11.6)            | 8.7 (8.67)                          | 50      | 55.7 (11.4)            | 7.8 (7.14)                          |
| Kasteleyn 2015       | 101          | 66 (9.3)               | 7.0 (2.8-16)                        | 100     | 65.6 (9.4)             | 8.5 (5-15)                          |
| Trief 2016           | 97           | 57.8 (10.8)            | 12.8 (8.5)                          | 78      | 56.9 (10.4)            | 12.6 (8.3)                          |
| McEwen 2017          | NR           | NR                     | NR                                  | NR      | NR                     | NR                                  |
| Samuel-Hodge 2017    | 36           | 55 (NR)                | 7.3 (NR)                            | 18      | 53 (NR)                | 5.4 (NR)                            |
| Wichit 2017          | 70           | 61.3 (11.6)            | 6.0 (4.7) 6.0 (4.7)                 | 70      | 55.5 (10.5)            | 5.4 (4.3)                           |

Supplemental Table S2. Trial participant baseline characteristics

|                   | Random sequence generation (selection bias) | Allocation concealment (selection bias) | Blinding of participants and personnel (performance bias) | Blinding of outcome assessment (detection bias) | Incomplete outcome data (attrition bias) | Selective reporting (reporting bias) | Other bias |
|-------------------|---------------------------------------------|-----------------------------------------|-----------------------------------------------------------|-------------------------------------------------|------------------------------------------|--------------------------------------|------------|
| Baig 2015         | ?                                           | ?                                       | -                                                         | ?                                               | -                                        | +                                    | ?          |
| Brown 2002        | ?                                           | ?                                       | -                                                         | +                                               | +                                        | +                                    | +          |
| Greene 2015       | ?                                           | ?                                       | -                                                         | ?                                               | ?                                        | ?                                    | ?          |
| Haltiwanger 2012  | +                                           | ?                                       | -                                                         | ?                                               | -                                        | -                                    | +          |
| Kang 2010         | +                                           | ?                                       | -                                                         | ?                                               | +                                        | +                                    | +          |
| Kasteleyn 2014    | +                                           | ?                                       | -                                                         | ?                                               | +                                        | +                                    | ?          |
| Keogh 2011        | +                                           | +                                       | -                                                         | +                                               | +                                        | -                                    | ?          |
| Khosrazivade 2014 | ?                                           | ?                                       | -                                                         | ?                                               | +                                        | ?                                    | ?          |
| McEwen 2017       | ?                                           | ?                                       | -                                                         | ?                                               | ?                                        | -                                    | ?          |
| Pearce 2008       | +                                           | +                                       | -                                                         | ?                                               | ?                                        | -                                    | +          |
| Samuel-Hodge 2009 | +                                           | +                                       | -                                                         | +                                               | -                                        | +                                    | +          |
| Samuel-Hodge 2017 | +                                           | ?                                       | -                                                         | +                                               | +                                        | +                                    | ?          |
| Shaya 2014        | -                                           | ?                                       | -                                                         | ?                                               | -                                        | +                                    | ?          |
| Sorkin 2014       | +                                           | +                                       | -                                                         | ?                                               | +                                        | +                                    | +          |
| Toobert 2011      | ?                                           | +                                       | -                                                         | +                                               | +                                        | +                                    | +          |
| Trief 2011        | ?                                           | ?                                       | -                                                         | +                                               | -                                        | +                                    | -          |
| Trief 2016        | +                                           | +                                       | -                                                         | +                                               | -                                        | -                                    | -          |
| Wichit 2017       | +                                           | +                                       | -                                                         | +                                               | +                                        | +                                    | ?          |
| Wing 1991         | ?                                           | ?                                       | -                                                         | ?                                               | +                                        | ?                                    | ?          |

Supplemental Figure S1. Risk of bias of included trials (Cochrane risk of bias tool)

Assessing confidence in the estimates of effect:  
GRADE

| Quality assessment        |                   |                      |                        |              |                      |                      | N <sup>o</sup> of patients   |                | Effect                                                 | Quality         | Importance |
|---------------------------|-------------------|----------------------|------------------------|--------------|----------------------|----------------------|------------------------------|----------------|--------------------------------------------------------|-----------------|------------|
| N <sup>o</sup> of studies | Study design      | Risk of bias         | Inconsistency          | Indirectness | Imprecision          | Other considerations | Social network interventions | Any comparator | Absolute (95% CI)                                      |                 |            |
| Social Support            |                   |                      |                        |              |                      |                      |                              |                |                                                        |                 |            |
| 7                         | randomised trials | serious <sup>1</sup> | serious <sup>2,3</sup> | not serious  | serious <sup>4</sup> | strong association   | 432                          | 397            | SMD <b>0.88 higher</b><br>(0.40 higher to 1.36 higher) | Low to moderate | IMPORTANT  |

CI: Confidence interval; SMD: Standardised mean difference

1. unclear blinding of outcome assessors
2. I<sup>2</sup>=90%
3. non-overlapping CIs
4. confidence interval or estimate effect includes non-important change as well as very important change

| Quality assessment        |                   |                      |                      |              |             |                      | N <sup>o</sup> of patients   |                | Effect                                              | Quality         | Importance |
|---------------------------|-------------------|----------------------|----------------------|--------------|-------------|----------------------|------------------------------|----------------|-----------------------------------------------------|-----------------|------------|
| N <sup>o</sup> of studies | Study design      | Risk of bias         | Inconsistency        | Indirectness | Imprecision | Other considerations | Social network interventions | Any comparator | Absolute (95% CI)                                   |                 |            |
| HbA1c: 3 months           |                   |                      |                      |              |             |                      |                              |                |                                                     |                 |            |
| 6                         | randomised trials | serious <sup>1</sup> | not serious          | not serious  | not serious | none                 | 471                          | 453            | MD <b>0.23 lower</b><br>(0.38 lower to 0.08 lower)  | Low to very low | IMPORTANT  |
| HbA1c: 5-7 Months         |                   |                      |                      |              |             |                      |                              |                |                                                     |                 |            |
| 8                         | randomised trials | serious <sup>1</sup> | serious <sup>2</sup> | not serious  | not serious | none                 | 694                          | 653            | MD <b>0.27 lower</b><br>(0.56 lower to 0.02 higher) | Low to very low | IMPORTANT  |
| HbA1c: 8+ months          |                   |                      |                      |              |             |                      |                              |                |                                                     |                 |            |

| Quality assessment        |                   |                      |                           |              |                      |                      | N <sup>o</sup> of patients   |                | Effect                                             | Quality         | Importance |
|---------------------------|-------------------|----------------------|---------------------------|--------------|----------------------|----------------------|------------------------------|----------------|----------------------------------------------------|-----------------|------------|
| N <sup>o</sup> of studies | Study design      | Risk of bias         | Inconsistency             | Indirectness | Imprecision          | Other considerations | Social network interventions | Any comparator | Absolute (95% CI)                                  |                 |            |
| 3                         | randomised trials | serious <sup>1</sup> | very serious <sup>2</sup> | not serious  | serious <sup>3</sup> | none                 | 355                          | 319            | MD <b>0.1 lower</b><br>(0.84 lower to 0.65 higher) | Low to very low | IMPORTANT  |
| HbA1c: Longest follow-up  |                   |                      |                           |              |                      |                      |                              |                |                                                    |                 |            |
| 13                        | randomised trials | serious <sup>1</sup> | not serious               | not serious  | not serious          | none                 | 1051                         | 974            | MD <b>0.17 lower</b><br>(0.34 lower to 0)          | Low to very low | IMPORTANT  |

CI: Confidence interval; MD: Mean difference

1. unclear allocation concealment
2. high I<sup>2</sup>
3. large CI

| Quality assessment                  |                   |                      |                             |              |                           |                      | N <sup>o</sup> of patients   |                | Effect                                                | Quality         | Importance |
|-------------------------------------|-------------------|----------------------|-----------------------------|--------------|---------------------------|----------------------|------------------------------|----------------|-------------------------------------------------------|-----------------|------------|
| N <sup>o</sup> of studies           | Study design      | Risk of bias         | Inconsistency               | Indirectness | Imprecision               | Other considerations | Social network interventions | Any comparator | Absolute (95% CI)                                     |                 |            |
| Well-being                          |                   |                      |                             |              |                           |                      |                              |                |                                                       |                 |            |
| 2                                   | randomised trials | serious <sup>1</sup> | very serious <sup>2,3</sup> | not serious  | very serious <sup>4</sup> | none                 | 141                          | 141            | SMD <b>0.62 higher</b><br>(0.13 lower to 1.37 higher) | Low to very low | IMPORTANT  |
| Quality of Life: Physical Component |                   |                      |                             |              |                           |                      |                              |                |                                                       |                 |            |
| 3                                   | randomised trials | serious <sup>1</sup> | not serious                 | not serious  | not serious               | none                 | 284                          | 240            | SMD <b>0.07 higher</b><br>(0.10 lower to 0.24 higher) | Low to very low | IMPORTANT  |
| Quality of Life: Mental Component   |                   |                      |                             |              |                           |                      |                              |                |                                                       |                 |            |
| 2                                   | randomised trials | serious <sup>1</sup> | not serious                 | not serious  | not serious               | none                 | 284                          | 240            | SMD <b>0.01 lower</b><br>(0.18 lower to 0.20 higher)  | Low to very low | IMPORTANT  |

CI: Confidence interval; SMD: Standardised mean difference

1. unclear allocation concealment
2. high I2
3. differences in scales used
4. very wide CI

Supplemental Table S3. GRADE assessment

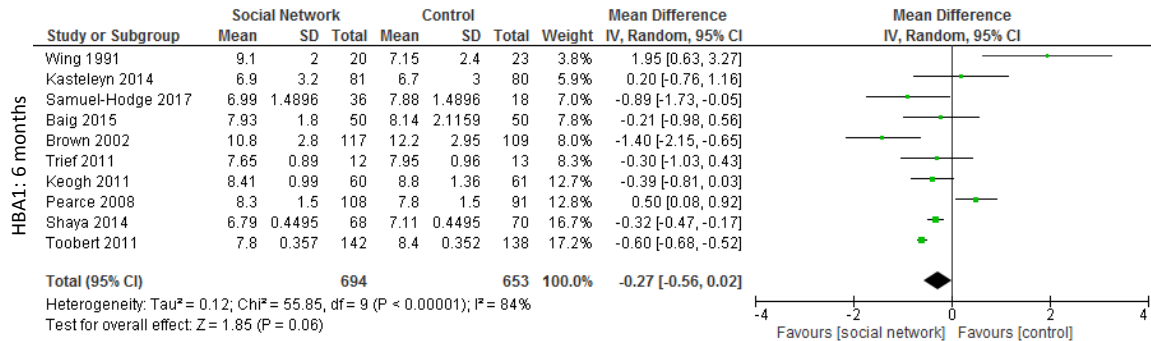

Supplemental Figure S2. Effect of social network intervention on HbA1c at 6 months follow-up

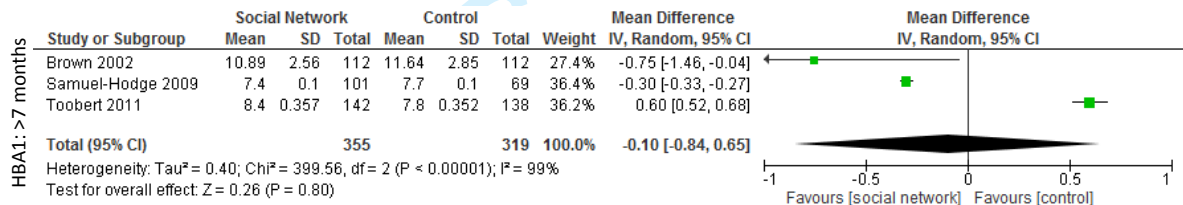

Supplemental Figure S3. Effect of social network intervention on HbA1c at 8+ months follow-up

| <b>Subgroup Analyses</b>            |                                                               |                                                                          |                                |                                                               |                                                                          |                                |
|-------------------------------------|---------------------------------------------------------------|--------------------------------------------------------------------------|--------------------------------|---------------------------------------------------------------|--------------------------------------------------------------------------|--------------------------------|
|                                     | <b>Hba1c at last follow-up</b>                                |                                                                          |                                | <b>Social support at last follow-up</b>                       |                                                                          |                                |
|                                     | <b>Subgroup</b><br><i>effect size (95% CI); I<sup>2</sup></i> | <b>Comparison subgroup</b><br><i>effect size (95% CI); I<sup>2</sup></i> | <b>P-value for interaction</b> | <b>Subgroup</b><br><i>effect size (95% CI); I<sup>2</sup></i> | <b>Comparison subgroup</b><br><i>effect size (95% CI); I<sup>2</sup></i> | <b>P-value for interaction</b> |
| <b>Patient characteristics</b>      |                                                               |                                                                          |                                |                                                               |                                                                          |                                |
| Mean baseline HbA1c > 8%            | -0.08 (-0.42, 0.26);<br>66%                                   | -0.28 (-0.40, -0.17);<br>0%                                              | 0.28                           | 1.04 (0.46, 1.61);<br>NA                                      | 0.49 (-0.50, 1.47);<br>88%                                               | 0.35                           |
| <b>Intervention characteristics</b> |                                                               |                                                                          |                                |                                                               |                                                                          |                                |
| Self-selected social network        | -0.22 (-0.46, 0.01);<br>63%                                   | -0.14 (-0.35, 0.06); 0%                                                  | 0.64                           | 0.94 (0.38, 1.50);<br>92%                                     | 0.56 (0.13, 1.0); NA                                                     | 0.30                           |
| Household member                    | -0.08 (-0.31, 0.16);<br>51%                                   | -0.33 (-0.45, -0.20);<br>0%                                              | 0.07                           | 1.16 (0.44, 1.88);<br>92%                                     | 0.49 (-0.07, 1.06);<br>79%                                               | 0.15                           |
| Contact time >585 minutes           | -0.18 (-0.46, 0.09);<br>25%                                   | -0.34 (-0.59, -0.09);<br>0%                                              | 0.40                           | 1.02 (0.42, 1.62);<br>NA                                      | 0.82 (0.18, 1.47); 73%                                                   | 0.66                           |
| Underlying framework                | -0.25 (-0.37, -0.14);<br>5%                                   | -0.11 (-0.63, 0.4); 76%                                                  | 0.6                            | 0.49 (0.10, 0.87);<br>71%                                     | 1.39 (0.32, 2.47); 94%                                                   | 0.12                           |
| Dyadic social network reported      | -0.22 (-0.39, -0.04);<br>13%                                  | -0.07 (-0.46, 0.32);<br>83%                                              | 0.51                           | 1.13 (0.47, 1.79);<br>89%                                     | 0.33 (-0.26, 0.93);<br>88%                                               | 0.08                           |
| <b>Trial characteristics</b>        |                                                               |                                                                          |                                |                                                               |                                                                          |                                |
| Low risk of bias                    | -0.19 (-0.50, 0.11);<br>69%                                   | -0.26 (-0.39, -0.14);<br>10%                                             | 0.67                           | 0.63 (0.45, 0.80);<br>0%                                      | 1.20 (-0.27, 2.66);<br>96%                                               | 0.45                           |

Supplemental Table S4. Subgroup analyses

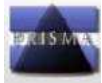

# PRISMA 2009 Checklist

1  
2  
3  
4  
5  
6  
7  
8  
9  
10  
11  
12  
13  
14  
15  
16  
17  
18  
19  
20  
21  
22  
23  
24  
25  
26  
27  
28  
29  
30  
31  
32  
33  
34  
35  
36  
37  
38  
39  
40  
41  
42  
43  
44  
45  
46  
47  
48  
49

| Section/topic                      | #  | Checklist item                                                                                                                                                                                                                                                                                              | Reported on page # |
|------------------------------------|----|-------------------------------------------------------------------------------------------------------------------------------------------------------------------------------------------------------------------------------------------------------------------------------------------------------------|--------------------|
| <b>TITLE</b>                       |    |                                                                                                                                                                                                                                                                                                             |                    |
| Title                              | 1  | Identify the report as a systematic review, meta-analysis, or both.                                                                                                                                                                                                                                         | 1                  |
| <b>ABSTRACT</b>                    |    |                                                                                                                                                                                                                                                                                                             |                    |
| Structured summary                 | 2  | Provide a structured summary including, as applicable: background; objectives; data sources; study eligibility criteria, participants, and interventions; study appraisal and synthesis methods; results; limitations; conclusions and implications of key findings; systematic review registration number. | 3                  |
| <b>INTRODUCTION</b>                |    |                                                                                                                                                                                                                                                                                                             |                    |
| Rationale                          | 3  | Describe the rationale for the review in the context of what is already known.                                                                                                                                                                                                                              | 5                  |
| Objectives                         | 4  | Provide an explicit statement of questions being addressed with reference to participants, interventions, comparisons, outcomes, and study design (PICOS).                                                                                                                                                  | 6                  |
| <b>METHODS</b>                     |    |                                                                                                                                                                                                                                                                                                             |                    |
| Protocol and registration          | 5  | Indicate if a review protocol exists, if and where it can be accessed (e.g., Web address), and, if available, provide registration information including registration number.                                                                                                                               | 6                  |
| Eligibility criteria               | 6  | Specify study characteristics (e.g., PICOS, length of follow-up) and report characteristics (e.g., years considered, language, publication status) used as criteria for eligibility, giving rationale.                                                                                                      | 6-7                |
| Information sources                | 7  | Describe all information sources (e.g., databases with dates of coverage, contact with study authors to identify additional studies) in the search and date last searched.                                                                                                                                  | 6-7 and supplement |
| Search                             | 8  | Present full electronic search strategy for at least one database, including any limits used, such that it could be repeated.                                                                                                                                                                               | supplement         |
| Study selection                    | 9  | State the process for selecting studies (i.e., screening, eligibility, included in systematic review, and, if applicable, included in the meta-analysis).                                                                                                                                                   | 7-8                |
| Data collection process            | 10 | Describe method of data extraction from reports (e.g., piloted forms, independently, in duplicate) and any processes for obtaining and confirming data from investigators.                                                                                                                                  | 8                  |
| Data items                         | 11 | List and define all variables for which data were sought (e.g., PICOS, funding sources) and any assumptions and simplifications made.                                                                                                                                                                       | 8                  |
| Risk of bias in individual studies | 12 | Describe methods used for assessing risk of bias of individual studies (including specification of whether this was done at the study or outcome level), and how this information is to be used in any data synthesis.                                                                                      | 9                  |
| Summary measures                   | 13 | State the principal summary measures (e.g., risk ratio, difference in means).                                                                                                                                                                                                                               | 9-10               |
| Synthesis of results               | 14 | Describe the methods of handling data and combining results of studies, if done, including measures of consistency (e.g., $I^2$ ) for each meta-analysis.                                                                                                                                                   | 10                 |



## PRISMA 2009 Checklist

Page 1 of 2

| Section/topic                 | #  | Checklist item                                                                                                                                                                                           | Reported on page #                     |
|-------------------------------|----|----------------------------------------------------------------------------------------------------------------------------------------------------------------------------------------------------------|----------------------------------------|
| Risk of bias across studies   | 15 | Specify any assessment of risk of bias that may affect the cumulative evidence (e.g., publication bias, selective reporting within studies).                                                             | 10                                     |
| Additional analyses           | 16 | Describe methods of additional analyses (e.g., sensitivity or subgroup analyses, meta-regression), if done, indicating which were pre-specified.                                                         | 10                                     |
| <b>RESULTS</b>                |    |                                                                                                                                                                                                          |                                        |
| Study selection               | 17 | Give numbers of studies screened, assessed for eligibility, and included in the review, with reasons for exclusions at each stage, ideally with a flow diagram.                                          | 11                                     |
| Study characteristics         | 18 | For each study, present characteristics for which data were extracted (e.g., study size, PICOS, follow-up period) and provide the citations.                                                             | 11-13, table 1                         |
| Risk of bias within studies   | 19 | Present data on risk of bias of each study and, if available, any outcome level assessment (see item 12).                                                                                                | 14, supp fig s1, supp table s3         |
| Results of individual studies | 20 | For all outcomes considered (benefits or harms), present, for each study: (a) simple summary data for each intervention group (b) effect estimates and confidence intervals, ideally with a forest plot. | 14-15, fig 4, supp fig s2, supp fig s3 |
| Synthesis of results          | 21 | Present results of each meta-analysis done, including confidence intervals and measures of consistency.                                                                                                  | 14-15                                  |
| Risk of bias across studies   | 22 | Present results of any assessment of risk of bias across studies (see Item 15).                                                                                                                          | 14, supp fig s1, supp table s3         |
| Additional analysis           | 23 | Give results of additional analyses, if done (e.g., sensitivity or subgroup analyses, meta-regression [see Item 16]).                                                                                    | 14-15, sup table s4                    |
| <b>DISCUSSION</b>             |    |                                                                                                                                                                                                          |                                        |
| Summary of evidence           | 24 | Summarize the main findings including the strength of evidence for each main outcome; consider their relevance to key groups (e.g., healthcare providers, users, and policy makers).                     | 15-17                                  |





# PRISMA 2009 Checklist

1  
2  
3  
4  
5  
6  
7  
8  
9  
10  
11  
12  
13  
14  
15  
16  
17  
18  
19  
20  
21  
22  
23  
24  
25  
26  
27  
28  
29  
30  
31  
32  
33  
34  
35  
36  
37  
38  
39  
40  
41  
42  
43  
44  
45  
46  
47  
48  
49

|                |    |                                                                                                                                                               |       |
|----------------|----|---------------------------------------------------------------------------------------------------------------------------------------------------------------|-------|
| Limitations    | 25 | Discuss limitations at study and outcome level (e.g., risk of bias), and at review-level (e.g., incomplete retrieval of identified research, reporting bias). | 16    |
| Conclusions    | 26 | Provide a general interpretation of the results in the context of other evidence, and implications for future research.                                       | 17-18 |
| <b>FUNDING</b> |    |                                                                                                                                                               |       |
| Funding        | 27 | Describe sources of funding for the systematic review and other support (e.g., supply of data); role of funders for the systematic review.                    | 19    |

From: Moher D, Liberati A, Tetzlaff J, Altman DG, The PRISMA Group (2009). Preferred Reporting Items for Systematic Reviews and Meta-Analyses: The PRISMA Statement. PLoS Med 6(6): e1000097. doi:10.1371/journal.pmed1000097

For more information, visit: [www.prisma-statement.org](http://www.prisma-statement.org).

Page 2 of 2

# BMJ Open

## A systematic review and meta-analysis of trials of social network interventions in type 2 diabetes

|                                 |                                                                                                                                                                                                                                                                                                                                                      |
|---------------------------------|------------------------------------------------------------------------------------------------------------------------------------------------------------------------------------------------------------------------------------------------------------------------------------------------------------------------------------------------------|
| Journal:                        | <i>BMJ Open</i>                                                                                                                                                                                                                                                                                                                                      |
| Manuscript ID                   | bmjopen-2017-016506.R2                                                                                                                                                                                                                                                                                                                               |
| Article Type:                   | Research                                                                                                                                                                                                                                                                                                                                             |
| Date Submitted by the Author:   | 22-Jun-2017                                                                                                                                                                                                                                                                                                                                          |
| Complete List of Authors:       | Spencer-Bonilla, Gabriela ; Mayo Clinic, Ponce, Oscar<br>Rodriguez-Gutierrez, R; Mayo Clinic<br>Alvarez-Villalobos, Neri<br>Erwin, Patricia; Mayo Clinic College of Medicine<br>Larrea-Mantilla, Laura<br>Rogers, Anne; University of Southampton, Faculty of Health Sciences<br>Montori, Victor; Mayo Clinic, Knowledge and Encounter Research Unit |
| <b>Primary Subject Heading</b>: | Diabetes and endocrinology                                                                                                                                                                                                                                                                                                                           |
| Secondary Subject Heading:      | Patient-centred medicine, Public health, Nutrition and metabolism                                                                                                                                                                                                                                                                                    |
| Keywords:                       | General diabetes < DIABETES & ENDOCRINOLOGY, Diabetes & endocrinology < INTERNAL MEDICINE, PUBLIC HEALTH                                                                                                                                                                                                                                             |
|                                 |                                                                                                                                                                                                                                                                                                                                                      |

SCHOLARONE™  
Manuscripts

1  
2  
3 **Title:** A systematic review and meta-analysis of trials of social network interventions in type 2  
4  
5 diabetes  
6

7  
8 **Short title:** Social network interventions in type 2 diabetes  
9

10 **Authors:** Gabriela Spencer-Bonilla<sup>1,2</sup>, Oscar J. Ponce<sup>1,3</sup>, Rene Rodriguez-Gutierrez<sup>1,3</sup>, Neri  
11  
12 Alvarez-Villalobos<sup>1,5</sup>, Patricia J. Erwin<sup>6</sup>, Laura Larrea-Mantilla<sup>1,7</sup>, Anne Rogers<sup>8</sup>, Victor M.  
13  
14 Montori\*<sup>1</sup>  
15

16  
17 **Affiliations:** <sup>1</sup> Department of Medicine, Mayo Clinic, Rochester, MN, 55905, USA.  
18

19  
20 <sup>2</sup> School of Medicine, University of Puerto Rico Medical Sciences Campus, San Juan, PR,  
21  
22 00936, USA  
23

24  
25 <sup>3</sup> Department of Medicine, Universidad Peruana Cayetano Heredia, Lima, 31, Peru  
26

27  
28 <sup>4</sup> Department of Internal Medicine, University Hospital "Dr. Jose E. Gonzalez", Autonomous  
29  
30 University of Nuevo Leon, Monterrey, 66460, Mexico  
31

32  
33 <sup>5</sup> Medical Statistics Department, University Hospital "Dr. Jose E. Gonzalez Autonomous  
34  
35 University of Nuevo Leon", Nuevo León, Monterrey, 64460, México  
36

37  
38 <sup>6</sup> Mayo Medical Library, Mayo Clinic, Rochester, MN, 55905, USA  
39

40  
41 <sup>7</sup> Evidence-Based Practice Center, Mayo Clinic, Rochester, MN, 55905, USA  
42

43  
44 <sup>8</sup> NIHR CLAHRC Wessex, Health Sciences, University of Southampton, Southampton, UK  
45

46 **\* Correspondence to:**

47 Victor M. Montori, MD MSc

48 Knowledge and Evaluation Research Unit

49 Division of Endocrinology, Diabetes, Metabolism and Nutrition

50 Mayo Clinic

51  
52  
53  
54  
55  
56  
57  
58  
59  
60  
200 1st Street SW, Rochester, MN 55905

1  
2  
3 Phone: (507) 293-0175  
4

5 E-mail: [montori.victor@mayo.edu](mailto:montori.victor@mayo.edu)  
6

7 **Word count: 3,327**  
8

9  
10 **Table and figure count: 5**  
11

12  
13 **Supplemental table and figure count: 7**  
14  
15  
16  
17  
18  
19  
20  
21  
22  
23  
24  
25  
26  
27  
28  
29  
30  
31  
32  
33  
34  
35  
36  
37  
38  
39  
40  
41  
42  
43  
44  
45  
46  
47  
48  
49  
50  
51  
52  
53  
54  
55  
56  
57  
58  
59  
60

**ABSTRACT**

**Objectives:** In the care of patients with type 2 diabetes, self-management is emphasized and studied while theory and observations suggest that patients also benefit from social support. We sought to assess the effect of social network interventions on social support, glycemic control, and quality of life in patients with type 2 diabetes.

**Research Design and Methods:** We searched Ovid MEDLINE, Ovid EBM Reviews, Cochrane Central Register of Controlled Trials, EMBASE, PsycINFO, and CINAHL through April 2017 for randomized trials (RCTs) of social network interventions in patients with type 2 diabetes. Reviewers working independently and in duplicate assessed eligibility and risk of bias, and extracted data from eligible RCTs. We pooled estimates using inverse variance random-effects meta-analysis.

**Results:** We found 19 eligible RCTs enrolling 2319 participants. Social network interventions were commonly based on individual behavior change rather than social or interpersonal theories of self-management, were educational, and sought to engage social network members for their knowledge and experience. Interventions improved social support (0.74 standard deviations [95% CI: 0.32, 1.15],  $I^2=89%$ , 8 RCTs), and HbA1c at 3 months (-0.5 percentage points [95% CI: -0.40, -0.11],  $I^2=12%$ , 9 RCTs), but not quality of life.

**Conclusions:** Despite a compelling theoretical base, researchers have only minimally studied the value of interventions targeting patients' social networks on diabetes care. Although the body of evidence to date is limited, and based on individual behavior change theories, the results are promising. This review challenges the scientific community to design and test theory-based interventions that go beyond self-management approaches to focus on the largely untapped potential of social networks to improve diabetes care.

**PROSPERO registration:** CRD42016036117

## ARTICLE SUMMARY

### Strengths and limitations

- This systematic review and meta-analysis was strengthened by a thorough literature search, author contact, reproducible judgments about the inclusion and appraisal of the evidence, and theory-based discussion of its results.
- The review found and summarized few reports of randomized trials testing interventions with poor theoretical alignment and limited protection against bias, which produced imprecise and inconsistent estimates of effect on markers of social support and short-term diabetes control.
- These limitations notwithstanding, this first meta-analysis of randomized trials of social network interventions identified an important knowledge (and practice) gap in the care of patients with type 2 diabetes, and produced a theoretical model connecting social network interventions with outcomes in these and other patients living with chronic conditions.

## 1. INTRODUCTION

Patients with type 2 diabetes implement self-management practices – self-testing, diet and activity regimens, medication administration – into their daily routines, along with frequent office visits for examination and laboratory testing to reduce the risk of complications of diabetes and its comorbidities. Patients must have sufficient capacity (resources, time, and energy) to shoulder this workload.<sup>1 2</sup> Without support or sufficient capacity, these delegations can overwhelm patients and contribute to burden of treatment which is associated with decreased adherence to medical recommendations and exhaustion with self-care.<sup>2</sup>

Patients do not enact the work of self-management in isolation. Rather, social relationships are often cited as essential to managing type 2 diabetes. Observational studies have repeatedly found that better social support is associated with effective diabetes self-management and better efficacy of self-management interventions.<sup>3 4</sup> A recent meta-synthesis identified the different mechanisms through which social networks can influence diabetes self-management by; (1) sharing knowledge and (2) facilitating access to resources, but only to the extent that patients can (3) engage and maintain productive relationships with network members (**Figure 1**).<sup>5</sup> Social networks may, therefore, mitigate (or exacerbate when dysfunctional) the workload patients must shoulder and impact diabetes care. Yet, social networks are not usually considered in the design and evaluation of chronic disease management interventions; self-management programs have typically been based on theories *individual* behavior change.<sup>6 7</sup> The impact of interventions based on social theories and aimed at supporting social networks on the care and outcomes of patients with type 2 diabetes remains unknown.

In this review, we summarize the literature evaluating interventions in randomized clinical trials (RCTs) that targeted friends, families, and peers (social networks) of patients with

1  
2  
3 type 2 diabetes. We describe the interventions, their theoretical underpinnings, how existing  
4 social networks are enrolled, and the efficacy of the interventions in terms of social support,  
5 quality of life, and glycemic control relative to interventions that did not target patients' social  
6 networks.  
7  
8  
9  
10  
11

## 12 **2. METHODS**

### 13 ***2.1 Protocol and Registration***

14  
15  
16  
17 This review adhered to the Preferred Reporting Items for Systematic Reviews and Meta-  
18 analysis (PRISMA) Statement<sup>8</sup> and has a registered protocol (PROSPERO registration:  
19 CRD42016036117).<sup>9</sup>  
20  
21  
22  
23

### 24 ***2.2 Eligibility Criteria***

25  
26  
27 We included RCTs testing interventions for type 2 diabetes management that  
28 involved patients' social networks (families, friends, peers and communities) in any capacity.  
29 RCTs had to evaluate interventions targeting dyadic (e.g. a spouse or friend) or community (ie.  
30 network of networks like neighborhoods, families and churches) networks<sup>10</sup> based on enduring  
31 social relationships likely to be involved in the patients' lives over the long periods of time  
32 required for self-management.<sup>11</sup> Thus, we excluded RCTs involving social relationships created  
33 for the trial, e.g., RCTs testing interventions enrolling and training patients with type 2 diabetes  
34 to provide peer support to other participants using online communities.  
35  
36  
37  
38  
39  
40  
41  
42  
43  
44  
45

### 46 ***2.3 Data Sources and Searches***

47  
48 A comprehensive electronic search of Ovid MEDLINE, Ovid EBM Reviews,  
49 Cochrane Central Register of Controlled Trials, EMBASE, PsycINFO, and EBSCO CINAHL  
50 was performed from inception of each database through the second week of April 2017 to  
51 identify published studies and conference abstracts. Working with an experienced medical  
52  
53  
54  
55  
56  
57  
58  
59  
60



1  
2  
3 librarian (P.J.E), G.S-B. developed a sensitive search strategy to identify eligible RCTs. Previous  
4  
5 qualitative studies in the field<sup>5 7 10</sup> were used to identify relevant search terms such as descriptors  
6  
7 of the constitution or properties of social networks (e.g. *social, couples, spouse, family* and  
8  
9 *church*) and terms related to relationships (e.g. *stigma and support*). The full search strategy is  
10  
11 available as **Supplemental Table S1**. There were no restrictions by date of publication or  
12  
13 language. Reference lists of included articles, reviews and qualitative syntheses on the topic were  
14  
15 hand-searched to identify any potentially eligible studies that may have been missed by our  
16  
17 electronic search strategy. An expert in the field (A.R.) reviewed the list of included studies for  
18  
19 missed articles.  
20  
21  
22  
23

#### 24 **2.4 Study Selection**

25  
26  
27 Three reviewers (G.S.B, R.R-G. and O.J.P.), working independently, in pairs, and in  
28  
29 duplicate, considered the eligibility of titles and abstracts that resulted from the search after  
30  
31 calibrating with 20 abstracts. As part of calibration, eligibility criteria were iterated for clarity  
32  
33 and consistency while considering examples of pre-existing and made-for-the-trial social  
34  
35 networks.  
36  
37  
38

39 Reviewers, working independently and in duplicate, considered all available full-text  
40  
41 reports for eligibility, obtained if at least one reviewer considered the abstract potentially  
42  
43 eligible. Before full-text screening, the reviewers calibrated their judgments using 10 eligible  
44  
45 reports. Reasons for exclusion were not mutually exclusive, therefore reviewers agreed to  
46  
47 prioritize reasons for exclusion as follows: (1) inappropriate population, (2) unsuitable study  
48  
49 design, (3) inappropriate intervention, and (4) no outcomes of interest reported. After completion  
50  
51 of full-text screening, chance-adjusted agreement was quantified using the kappa statistic,<sup>12</sup> and  
52  
53 disagreements resolved by discussion and consensus among the three reviewers. We  
54  
55  
56  
57  
58  
59  
60

1  
2  
3 subsequently searched MEDLINE with the first and last authors' last names for protocols for  
4  
5 other relevant publications (e.g., pilots and results at different follow-up lengths) to obtain  
6  
7 additional details about the included RCTs.  
8  
9

## 10 ***2.5 Data Extraction and Quality Assessment***

11  
12 The three reviewers, calibrated using two reports, performed data extraction  
13  
14 independently and in duplicate using a standardized form. Extracted data included a full  
15  
16 description of study characteristics: design, setting where recruitment took place, participant  
17  
18 eligibility criteria, conceptual frameworks justifying the interventions, and of baseline participant  
19  
20 characteristics. For each intervention, we sought details about who delivered the intervention, to  
21  
22 whom (which members of the social network were involved), dose (duration and frequency of  
23  
24 sessions, total contact time), and fidelity (monitoring of fidelity to the protocol and extent of  
25  
26 participant attendance and reasons for non-attendance). We planned to extract the following  
27  
28 outcomes: quality of life, social support, treatment burden, metabolic control, and diabetes-  
29  
30 related morbidity and mortality; no trials however, reported diabetes-related morbidity and  
31  
32 mortality as outcomes measures. Eligible trials reporting on at least one of these outcomes were  
33  
34 included.  
35  
36  
37  
38  
39

40  
41 Due to the heterogeneity of included interventions and comparators we used modified  
42  
43 versions of previously published frameworks<sup>5 13</sup> to describe the strategies used (e.g. information  
44  
45 and education or cognitive strategies). We also classified how the social network was  
46  
47 incorporated into the intervention (**Figure 1**); for (1) sharing information, to (2) facilitate  
48  
49 accessing and mediating resources, or to (3) support productive relationships. After piloting this  
50  
51 procedure with 2 RCTs, two reviewers classified the interventions using line-by-line coding of  
52  
53 trial methods. Conflicts were resolved by consensus.  
54  
55  
56  
57  
58  
59  
60

1  
2  
3 The three reviewers, independently and in duplicate, assessed each RCT's risk of bias  
4 using the Cochrane tool,<sup>14</sup> recognizing the impossibility of blinding participants and  
5 interventionists (persons delivering the intervention, e.g. physician, nurse educators) to  
6 intervention allocation.<sup>15</sup> These could not be disregarded, however, because subjective and  
7 patient-reported outcomes were assessed. Publication bias could not be assessed statistically or  
8 graphically given the small number and inconsistency of included RCTs.<sup>16</sup> The overall  
9 confidence in the results was rated using the Grading of Recommendations Assessment,  
10 Development and Evaluation (GRADE) approach.<sup>17</sup> This approach assesses the confidence  
11 merited by the body of evidence based on the risk of bias of the individual studies, inconsistency  
12 in the results, indirectness, imprecision, and other considerations.  
13  
14  
15  
16  
17  
18  
19  
20  
21  
22  
23  
24  
25  
26

## 27 ***2.6 Author Contact***

28  
29 For all included RCTs, we asked the corresponding author via email to complete a  
30 table of missing data and risk of bias information. Non-responders received a second  
31 communication two weeks later. Six of 18 authors responded with complete or partial data; one  
32 author reported no longer having access to necessary data.  
33  
34  
35  
36  
37  
38  
39

## 40 ***2.7 Data Synthesis and Analysis***

41  
42 We used Review Manager version 5.3 to conduct meta-analyses.<sup>18</sup> When possible, we  
43 generated meta-analytic estimates of treatment effects using the inverse variance random-effects  
44 model. When trials had more than one comparator to the intervention of interest, we chose the  
45 arm whose procedures most resembled usual care or no intervention, as this was the most  
46 common comparator for two-arm trials. Meta-analyses generated either a weighted mean  
47 difference expressed in usual units (e.g., HbA1c) or a mean difference expressed in standard-  
48 deviation units, a common approach that enables pooling across different scales assessing the  
49  
50  
51  
52  
53  
54  
55  
56  
57  
58  
59  
60

1  
2  
3 same construct (e.g., quality of life). A standardized mean difference (SDM) of 0.5 standard  
4  
5 deviations or greater was considered important.<sup>19</sup>  
6  
7

8 To determine the impact of interventions on HbA1c, we pooled results at 3 months  
9  
10 (represented by studies reporting results from 2 to 4 months of follow-up), 6 months (5-7 months  
11  
12 of follow-up) or greater (>7 months of follow up). Otherwise, values at longest follow-up were  
13  
14 used for all outcomes. Missing measures of variability were imputed either from data reported at  
15  
16 another time-point in the same trial and in the same arm (when available) or as the average  
17  
18 standard deviation observed across all RCTs. Inconsistency for each outcome not attributable to  
19  
20 chance was assessed visually using forest plots and estimated using the  $I^2$  statistic.  $I^2 < 25\%$   
21  
22 reflected low inconsistency;  $I^2 > 75\%$  reflected high inconsistency.<sup>20</sup>  
23  
24  
25  
26

## 27 ***2.8 Modifications to the registered protocol***

28  
29 The included trials were heterogeneous in terms of length of follow-up. In addition to  
30  
31 performing pooled analyses for HbA1c at 3, 6, and >7 months of follow-up, to increase the  
32  
33 power and applicability of our analyses, we also pooled all measures of HbA1c at the longest  
34  
35 follow-up reported.  
36  
37  
38

## 39 ***2.9 Subgroup Analyses***

40  
41  
42 To understand inconsistency in results, we planned a few subgroup analyses on social  
43  
44 support, HbA1c results and quality of life, but sparse data prevented the latter. We tested  
45  
46 treatment interactions with risk of bias (low vs. moderate or high), level of glycemic control at  
47  
48 baseline (mean baseline HbA1c>8%), and intervention features. Network subgroups were drawn  
49  
50 by whether the target of the intervention was (1) a patient- or an investigator-selected (by  
51  
52 protocol, e.g., the patient's spouse) social network member; (2) a member of the patient's  
53  
54 household or not as reported in the trial inclusion criteria; (if the social network member  
55  
56  
57  
58  
59  
60

involved was a spouse, they were assumed to be household members); and (3) a dyadic network or a group of more than two people. We also tested subgroups based on whether the intervention was based on a specific underlying framework or not, and on the duration in contact minutes with the interventionist using a median split. For each analysis, we estimated the subgroup effect and conducted a test of interaction. Because most subgroup analyses were underpowered and exploratory, we did not adjust alpha levels for multiple comparisons.

### 3. RESULTS

#### 3.1 Study Selection

**Figure 2** demonstrates the study selection process. We found 1208 records (7 of which were identified through hand-search); 137 were identified as potentially eligible for inclusion after title and abstract screening. We reproducibly ( $k=.73$ ) included 19 trials; 17 patient-randomized trials<sup>21-30 31-42</sup> and 2 cluster-randomized trials<sup>43 44</sup>; overall these trials enrolled 2319 participants.

#### 3.2 Study Characteristics

**Table 1** describes these RCTs. Thirteen of the 19 RCTs reported an underlying framework for the intervention either in publication or after author contact.<sup>21 24 25 28 31 32 37-42 44</sup> While variability in all study characteristics was the norm, most RCTs took place in the community, with the experimental intervention delivering education, information transfer, goal-setting and problem solving (**Figure 3, Table 1**). Social networks -- family members, spouses or partners -- were most commonly employed to share knowledge and experience (**Figure 3**). Overall chance-adjusted agreement for classification of intervention and comparator procedures (**Figure 3**) was good ( $kappa=.79$ ); comparators used in trials were heterogeneous. **Supplemental Table S2** describes baseline characteristics of RCT participants. One RCT only enrolled patients with

1  
2  
3 diabetes and a history of an acute coronary event;<sup>31</sup> one required participants to also have  
4  
5 uncontrolled hypertension,<sup>45</sup> and another enrolled only patients that were overweight or obese.<sup>34</sup>  
6  
7

8 Two trials only enrolled women.<sup>26 29</sup>  
9  
10  
11  
12  
13  
14  
15  
16  
17  
18  
19  
20  
21  
22  
23  
24  
25  
26  
27  
28  
29  
30  
31  
32  
33  
34  
35  
36  
37  
38  
39  
40  
41  
42  
43  
44  
45  
46  
47  
48  
49  
50  
51  
52  
53  
54  
55  
56  
57  
58  
59  
60

For peer review only

| Study               | Intervention description                                                        | Underlying framework                  | Support network involved and role                                                                                 | Intervention deliverer(s)                               | Setting where intervention was delivered | Length (months) | Intervention contact time (minutes) |
|---------------------|---------------------------------------------------------------------------------|---------------------------------------|-------------------------------------------------------------------------------------------------------------------|---------------------------------------------------------|------------------------------------------|-----------------|-------------------------------------|
| Wing 1991           | Behavioral weight loss program with calorie restriction                         | Behavioral marital therapy            | Spouse; participated in intervention, spouse support for modifying diet and exercise habits                       | Staff and physicians                                    | NR                                       | 5               | 960                                 |
| Brown 2002          | Instructional and support group emphasizing nutrition, monitoring and self-care | NR                                    | Close family member or close friend; participated in intervention                                                 | Clinicians and community health workers                 | Community                                | 12              | 120                                 |
| Pearce 2008         | Individualized patient education sessions and newsletters                       | Health belief model                   | Relative or friend; joined participant for education session                                                      | Nurse practitioner educator                             | Community and telephone                  | 12              | NR                                  |
| Samuel - Hodge 2009 | Individualized counseling, group education sessions and phone contact           | Behavior change and adult education   | Church community; building community support systems                                                              | Church diabetes advisor (CDA) and a health professional | Community and telephone                  | 12              | 1140-1500                           |
| Kang 2010           | Individualized counseling, group education sessions and phone contact           | NR                                    | Household family member; participate in intervention, dyad also received an education plan based upon their needs | Clinicians and social workers                           | Hospital and telephone                   | 6               | 450                                 |
| Keogh 2011          | Individualized sessions to modify diabetes perceptions and develop action plans | Self-regulation of health and illness | Family member; participated in intervention, tailored to dyad                                                     | Psychologist                                            | Home                                     | 0.75            | 100                                 |
| Toobert 2011        | Group sessions based on education and problem-solving                           | NR                                    | Family members; participate in family nights                                                                      | Group leader                                            | Community                                | NR              | NR                                  |
| Trief 2011          | Diabetes education, goal setting, and collaborative problem solving             | Social learning theory                | Spouse/partner: participated in couples' calls to promote collaborative problem-solving                           | Diabetes educator and marriage/family therapist         | Telephone                                | 3               | NR                                  |
| Haltiwanger 2012    | Diabetes education group sessions                                               | NR                                    | Spouse; participated in intervention                                                                              | Health educator                                         | NR                                       | 2               | 720                                 |

|                   |                                                                                                |                                                                                    |                                                                                                                      |                                   |                               |   |      |
|-------------------|------------------------------------------------------------------------------------------------|------------------------------------------------------------------------------------|----------------------------------------------------------------------------------------------------------------------|-----------------------------------|-------------------------------|---|------|
| Khosravizade 2014 | Individualized education; focus on medication adherence and family support behavior            | NR                                                                                 | Household family member; attended small group sessions for family members                                            | Researchers                       | NR                            | 3 | NR   |
| Shaya 2014        | Education sessions and team building exercises                                                 | Education and medication therapy management                                        | Peers; participated in intervention which included team-building                                                     | Nurse practitioner educator       | Community                     | 6 | NR   |
| Sorkin 2014       | Group sessions, home visits, and booster phone calls                                           | Lifestyle changes                                                                  | Daughter; participated in intervention, dyadic collaboration encouraged                                              | Lifestyle community coach         | Community, home and telephone | 4 | NR   |
| Greene 2015       | Diabetes self-management education                                                             | NR                                                                                 | Household family member or companion; participated in intervention                                                   | Unclear                           | NR                            | 2 | 3120 |
| Baig 2015         | Group education classes focused on nutrition, physical activity and behavioral problem solving | Social cognitive theory, the transtheoretical model, and self-determination theory | Church community; community based participatory study                                                                | Lay leaders                       | Community                     | 2 | 720  |
| Kasteleyn 2015    | Home visits with individualized education sessions                                             | Self-efficacy                                                                      | Spouse/partner; attended sessions                                                                                    | Diabetes nurse practitioner       | Home                          | 2 | 155  |
| Trief 2016        | Telephone calls with education and behavioral strategies with spouse                           | Interdependence theory and social learning theory                                  | Spouse/partner; participated in intervention and phone calls based collaborative problem-solving and interdependence | Diabetes educator or counselor    | Telephone                     | 3 | 720  |
| McEwen 2017       | Family-based T2DM social support intervention                                                  | Family social capital                                                              | Family members; participated in intervention                                                                         | Certified diabetes educator nurse | Community, home and telephone | 3 | 1140 |
| Samuel-Hodge 2017 | Group-based sessions focusing on group sharing and problem solving                             | Social interdependence and social support theories                                 | Family member; participated in intervention                                                                          | Registered dietitians             | University                    | 5 | 2400 |
| Wichit 2017       | Group-based education sessions using workbooks                                                 | Self-efficacy theory                                                               | Household family member; participated in intervention                                                                | Registered nurse                  | Diabetes clinic               | 3 | 360  |

**Table 1.** Trial and intervention characteristics



### 3.3 Risk of bias and confidence in the body of evidence

The overall risk of bias was judged to be moderate for all outcomes (**Supplemental Figure S1, Table S3**). Allocation concealment and blinding of outcome assessor were often unclear; some studies lost up to one third of participants to follow-up. Outcome reporting was deemed complete for most trials. When considering the body of evidence, unexplained inconsistency in results across RCTs further reduced confidence in the overall results, particularly for the social support outcome.

### 3.4 Meta-analysis

#### 3.4.1 Self-reported outcomes

After pooling the results from the 8 RCTs reporting social support (986 total participants), we found a large increase in self-reported social support, SDM 0.74 (95% CI, 0.32 to 1.15), with high inconsistency in results across trials ( $I^2=89\%$ ) (**Figure 4**). Inconsistency remained unexplained after subgroup analyses (**Supplemental table S4**).

Both well-being (measured with WHO5<sup>46</sup> and the 12-item well-being scale<sup>47</sup>) and self-rated health (measured with the SF-36<sup>48</sup> and SF-12<sup>49</sup> mental and physical score components) scales assessed quality of life. When pooled, neither well-being scales (2 trials, 282 participants; SMD 0.62 [95% CI, -0.13 to 1.37],  $I^2=91\%$ ) nor the physical (4 trials, 524 participants; SMD 0.06 [95% CI, -0.11 to 0.23],  $I^2=0\%$ ) and mental (4 trials, 524 participants; SMD 0.01 [95% CI, -0.18 to 0.20],  $I^2=14\%$ ) self-rated health measures showed significant improvements (**Figure 4**). One trial assessed the burden of treatment<sup>39</sup> using the 17-item Diabetes Distress scale<sup>50</sup> and found that the intervention group reported lower treatment burden than the comparator.

#### 3.4.2 Biomedical outcomes

1  
2  
3  
4  
5  
6  
7  
8  
9  
10  
11  
12  
13  
14  
15  
16  
17  
18  
19  
20  
21  
22  
23  
24  
25  
26  
27  
28  
29  
30  
31  
32  
33  
34  
35  
36  
37  
38  
39  
40  
41  
42  
43  
44  
45  
46  
47  
48  
49  
50  
51  
52  
53  
54  
55  
56  
57  
58  
59  
60

When pooled, the 9 trials reporting HbA1c at 3 months, showed significant lowering (1081 participants; mean difference (MD) -0.25 [95% CI, -0.40 to -0.11]) with minimal inconsistency across trials ( $I^2=12\%$ ). No significant differences in HbA1c were evident at 6 months (141 trials, 1504 participants; MD -0.24 [95% CI, -0.52 to 0.03],  $I^2=83\%$ ) (**Supplemental figure S2**), >7 months after baseline (3 trials, 674 participants; MD -0.10 [95% CI, -0.84 to 0.64],  $I^2=99\%$ ) (**Supplemental figure S3**), or when considering the HbA1c available at the point of longest follow-up (17 trials, 2182 participants; MD -0.16 [95% CI, -0.32 to 0.00],  $I^2=46\%$ ) with moderate to high inconsistency across trials at all time-points (**Figure 4**). Subgroup analyses did not reveal important interactions (**Supplemental table S4**).

## 4. DISCUSSION AND CONCLUSION

### 4.1 Discussion

#### 4.1.1 Summary of findings

We uncovered a nascent body of evidence, small, sparse, and heterogeneous, at moderate risk of bias, reporting favorable effects on social support and short-term HbA1c and no significant effect on quality of life of social network interventions in patients with type 2 diabetes. Only one trial evaluated treatment burden directly, and its findings are broadly consistent with our logic model (**Figure 1**) suggesting benefit of interventions to promote social network support in patients with type 2 diabetes.

#### 4.1.2 Comparisons with Previous Studies

To our knowledge, we provide the first meta-analysis of the effects of social network interventions in the management of type 2 diabetes. In concordance with the findings of a previous systematic review on social support in diabetes, studies were highly heterogeneous in their intervention components with limited details reported about these interventions.<sup>51</sup> A recent

1  
2  
3 meta-synthesis of qualitative literature reports that some group-based initiatives use individual  
4 rather than social approaches.<sup>7</sup> This is reflected in our findings; seven trials reported the  
5  
6 underlying framework for their social network intervention to be based on single-person theories  
7  
8 such as self-efficacy and self-regulation. Similarly, only one intervention employed all  
9  
10 mechanisms of social network support identified in diabetes management (**Figure 3**).  
11  
12  
13  
14

#### 15 ***4.1.3 Strengths and Limitations of this Review***

16  
17 Our search strategy was designed to balance rigor with feasibility; thus, it may have  
18 missed reports which did not mention the social support component of the intervention in the  
19 title or abstract. We may have overestimated the risk of bias of these RCTs because of their  
20 unclear reporting of trial methods.<sup>52</sup> This review reports on an evolving field and its limitations  
21 apply almost exclusively to the meta-analytical portion of the systematic review: trial methods  
22 and results are heterogeneous and therefore, may limit the usefulness of statistical pooling. We  
23 could not assess for publication bias; therefore our results could represent an overly sanguine  
24 view of the efficacy of social network interventions.  
25  
26  
27  
28  
29  
30  
31  
32  
33  
34  
35

36 Conversely, our review has several strengths, including a thorough literature search and  
37 reproducible judgments about inclusion, and intervention descriptions. Pooling was followed by  
38 a parsimonious set of exploratory pre-specified subgroup analyses to explore inconsistency in  
39 results across RCTs. Overall, we are confident this report fairly represents the emerging body of  
40 evidence about interventions directed at social networks in support of patients with type 2  
41 diabetes.  
42  
43  
44  
45  
46  
47  
48  
49

#### 50 ***4.2 Implications for Research and Practice***

51  
52 Future research should clearly identify and report the explanatory frameworks,  
53 mechanisms, and theories for the social network interventions being tested. Ideally, the theory  
54  
55  
56  
57  
58  
59  
60

1  
2  
3 should be social and explain the proposed impact of social network interventions on care and  
4  
5 outcomes.  
6  
7

8 A recent meta-analysis reported decreased mortality in persons with higher social  
9  
10 support.<sup>53</sup> Studies in patients with diabetes<sup>54</sup> and older adults<sup>55</sup> have found social support to be  
11  
12 predictive of morbidity and mortality, after adjusting for differences in health behaviors.  
13

14 Emerging literature also highlights network composition (type and number relationships rather  
15  
16 than quality of relationships) as important for health and self-management.<sup>55 56</sup>  
17  
18

19 Proposed mechanisms for the protective effects include modulation of *physiologic stress*  
20  
21 responses.<sup>57-59</sup> Social networks can also affect diabetes self-management by impacting the  
22  
23 *workload* patients must enact, by providing opportunities to share knowledge, and by facilitating  
24  
25 access to resources.<sup>5</sup> In turn, access to these networks requires patients to work to be aware and  
26  
27 to deal with network relationships.<sup>5</sup> The effects on *workload* are likely to interact with the theory  
28  
29 of *physiological stress* modulation, as access to healthcare and changes in self-efficacy affect  
30  
31 psychosocial stress. This is especially pertinent for people with limited access to formal health  
32  
33 care; they may be more likely to present to care with higher stress and to depend critically on  
34  
35 personal social networks to respond.<sup>5 7</sup> Therefore, the effects of involving social networks in  
36  
37 diabetes management on intermediate outcomes such as allostatic load, treatment workload, and  
38  
39 treatment burden (assessed in only one included trial) should be tested in future randomized trials  
40  
41 along with health outcomes.  
42  
43  
44  
45  
46  
47

48 Although it may be premature to translate this evidence into practice, the preceding  
49  
50 observational and qualitative research and the evolving experimental research summarized here  
51  
52 suggest an important but underexploited role for social networks in supporting the work patients  
53  
54 do to manage type 2 diabetes. Care approaches enrolling social networks as mediators of  
55  
56  
57  
58  
59  
60

1  
2  
3 knowledge and access to resources may prove more valuable than interventions supporting self-  
4  
5 management alone. Such promise awaits further intervention development and evaluation.  
6  
7

#### 8 **4.3 Conclusion**

9  
10 Despite a compelling theoretical base, researchers have barely studied the value of  
11  
12 interventions targeting patient social networks on diabetes care. The body of evidence to date is  
13  
14 limited at moderate risk of bias, heterogeneous, with inconsistent results, and based on  
15  
16 individualistic theories. The results, however, are promising. This review challenges the  
17  
18 scientific community to design and test theory-based interventions that go beyond self-  
19  
20 management approaches to focus on the largely untapped potential of social networks to improve  
21  
22 diabetes care.  
23  
24  
25  
26  
27  
28  
29  
30  
31  
32  
33  
34  
35  
36  
37  
38  
39  
40  
41  
42  
43  
44  
45  
46  
47  
48  
49  
50  
51  
52  
53  
54  
55  
56  
57  
58  
59  
60

view only

1  
2  
3  
4  
5  
6  
7  
8  
9  
10  
11  
12  
13  
14  
15  
16  
17  
18  
19  
20  
21  
22  
**Funding:** GS-B was supported by CTSA Grant Number TL1TR000137 from the National Center for Advancing Translational Science (NCATS) and grant number 3R01HL131535-01S1 from the National Heart Lung and Blood Institute (NHLBI). VMM was partially supported by Grant Number UL1TR000135 from the National Center for Advancing Translational Science (NCATS), a component of the National Institutes of Health (NIH). Its contents are solely the responsibility of the author and do not necessarily represent the official view of the NIH. The funder had no role in study design, data collection, data analysis, data interpretation, or writing of the report.

23  
24  
25  
26  
27  
28  
29  
30  
31  
32  
**Author contributions:** GS-B, OJP, PJE, RR-G and VMM designed the protocol. GS-B and PJE searched the literature; GS-B, OJP, and RR-G extracted the data. GS-B, NA-V and VMM analyzed the data. GS-B, OJP, RR-G, NA-V, PJE, LL-M, AR and VMM interpreted the data and critically revised the report.

33  
34  
35  
**Conflicts of Interest Disclosure:** No competing financial interests exist.

36  
37  
38  
39  
40  
41  
42  
43  
44  
45  
46  
47  
48  
49  
50  
51  
52  
53  
54  
55  
56  
57  
58  
59  
60  
**Availability of data and material:** Datasets used and/or analyzed during the current study available from the corresponding author on reasonable request.

## REFERENCES

1. Shippee ND, Shah ND, May CR, et al. Cumulative complexity: a functional, patient-centered model of patient complexity can improve research and practice. *Journal of Clinical Epidemiology* 2012;65(10):1041-51. doi: <http://dx.doi.org/10.1016/j.jclinepi.2012.05.005>
2. Eton DT, Yost KJ, Lai JS, et al. Development and validation of the Patient Experience with Treatment and Self-management (PETS): a patient-reported measure of treatment burden. *Qual Life Res* 2016 doi: 10.1007/s11136-016-1397-0
3. Soto SC, Louie SY, Cherrington AL, et al. An ecological perspective on diabetes self-care support, self-management behaviors, and hemoglobin A1C among Latinos. *Diabetes Educ* 2015;41(2):214-23. doi: 10.1177/0145721715569078 [published Online First: 2015/02/07]
4. Strom JL, Egede LE. The Impact of Social Support on Outcomes in Adult Patients with Type 2 Diabetes: A Systematic Review. *Curr Diab Rep* 2012;12(6):769-81. doi: 10.1007/s11892-012-0317-0
5. Vassilev I, Rogers A, Kennedy A, et al. The influence of social networks on self-management support: a metasynthesis. *BMC Public Health* 2014;14:719. doi: 10.1186/1471-2458-14-719 [published Online First: 2014/07/16]
6. Ong BN, Rogers A, Kennedy A, et al. Behaviour change and social blinkers? The role of sociology in trials of self-management behaviour in chronic conditions. *Social Health Illn* 2014;36(2):226-38. doi: 10.1111/1467-9566.12113
7. Foss C, Knutsen I, Kennedy A, et al. Connectivity, contest and the ties of self-management support for type 2 diabetes: a meta-synthesis of qualitative literature. *Health Soc Care Community* 2015 doi: 10.1111/hsc.12272 [published Online First: 2015/10/03]
8. Swartz MK. The PRISMA statement: a guideline for systematic reviews and meta-analyses. *J Pediatr Health Care* 2011;25(1):1-2. doi: 10.1016/j.pedhc.2010.09.006 [published Online First: 2010/12/15]
9. Spencer Bonilla G, Rodriguez-Gutierrez R, Ponce O, et al. Social network interventions in the management of type 2 diabetes: a systematic review and meta-analysis of randomized trials. PROSPERO 2016:CRD42016036117 Available from [http://www.crd.york.ac.uk/PROSPERO/display\\_record.asp?ID=CRD42016036117](http://www.crd.york.ac.uk/PROSPERO/display_record.asp?ID=CRD42016036117).
10. Rogers A, Vassilev I, Sanders C, et al. Social networks, work and network-based resources for the management of long-term conditions: a framework and study protocol for developing self-care support. *Implement Sci* 2011;6:56. doi: 10.1186/1748-5908-6-56 [published Online First: 2011/05/31]
11. Hogan BE, Linden W, Najarian B. Social support interventions: do they work? *Clin Psychol Rev* 2002;22(3):383-442. [published Online First: 2007/01/05]
12. McGinn T, Wyer PC, Newman TB, et al. Tips for learners of evidence-based medicine: 3. Measures of observer variability (kappa statistic). *Cmaj* 2004;171(11):1369-73. doi: 10.1503/cmaj.1031981 [published Online First: 2004/11/24]
13. Kamath CC, Vickers KS, Ehrlich A, et al. Clinical review: behavioral interventions to prevent childhood obesity: a systematic review and metaanalyses of randomized trials. *J Clin Endocrinol Metab* 2008;93(12):4606-15. doi: 10.1210/jc.2006-2411 [published Online First: 2008/09/11]
14. Higgins JP, Altman DG, Gotzsche PC, et al. The Cochrane Collaboration's tool for assessing risk of bias in randomised trials. *BMJ* 2011;343:d5928. doi: 10.1136/bmj.d5928 [published Online First: 2011/10/20]
15. Pawson R, Greenhalgh T, Harvey G, et al. Realist review--a new method of systematic review designed for complex policy interventions. *J Health Serv Res Policy* 2005;10 Suppl 1:21-34. doi: 10.1258/1355819054308530 [published Online First: 2005/08/02]

16. Guyatt G, Rennie D, Meade MO, et al. Users' guides to the medical literature a manual for evidence-based clinical practice. 3rd ed: McGraw-Hill Education 2015.
17. Guyatt G, Oxman AD, Sultan S, et al. GRADE guidelines: 11. Making an overall rating of confidence in effect estimates for a single outcome and for all outcomes. *Journal of clinical epidemiology* 2013;66(2):151-7. doi: 10.1016/j.jclinepi.2012.01.006 [published Online First: 2012/05/01]
18. Review Manager (RevMan) [Computer program] . Version 5.3. *Copenhagen: The Nordic Cochrane Centre* 2014(The Cochrane Collaboration)
19. Cohen J. Statistical Power Analysis for the Behavioral Sciences. *Hillsdale, NJ; Erlbaum* 1988;Second Edition
20. Higgins JP, Thompson SG, Deeks JJ, et al. Measuring inconsistency in meta-analyses. *BMJ* 2003;327(7414):557-60. doi: 10.1136/bmj.327.7414.557 [published Online First: 2003/09/06]
21. Wing RR, Marcus MD, Epstein LH, et al. A "family-based" approach to the treatment of obese type II diabetic patients. *J Consult Clin Psychol* 1991;59(1):156-62. [published Online First: 1991/02/01]
22. Brown SA, Garcia AA, Kouzekanani K, et al. Culturally competent diabetes self-management education for Mexican Americans: the Starr County border health initiative. *Diabetes Care* 2002;25(2):259-68. [published Online First: 2002/01/30]
23. Kang CM, Chang SC, Chen PL, et al. Comparison of family partnership intervention care vs. conventional care in adult patients with poorly controlled type 2 diabetes in a community hospital: a randomized controlled trial. *Int J Nurs Stud* 2010;47(11):1363-73. doi: <http://dx.doi.org/10.1016/j.ijnurstu.2010.03.009>
24. Keogh KM, Smith SM, White P, et al. Psychological family intervention for poorly controlled type 2 diabetes. *American Journal of Managed Care* 2011;17(2):105-13.
25. Trief P, Sandberg JG, Ploutz-Snyder R, et al. Promoting couples collaboration in type 2 diabetes: the diabetes support project pilot data. *Fam Syst Health* 2011;29(3):253-61. doi: <http://dx.doi.org/10.1037/a0024564>
26. Toobert DJ, Strycker LA, King DK, et al. Long-term outcomes from a multiple-risk-factor diabetes trial for Latinas: Viva Bien! *Translational Behavioral Medicine* 2011;1(3):416-26. doi: <http://dx.doi.org/10.1007/s13142-010-0011-1>
27. Haltiwanger EP, Brutus H. A Culturally Sensitive Diabetes Peer Support for Older Mexican-Americans. *Occupational Therapy International* 2012;19(2):67-75 9p. doi: 10.1002/oti.320
28. Shaya FT, Chirikov VV, Howard D, et al. Effect of social networks intervention in type 2 diabetes: a partial randomised study. *Journal of Epidemiology & Community Health* 2014;68(4):326-32. doi: <http://dx.doi.org/10.1136/jech-2013-203274>
29. Sorkin DH, Mavandadi S, Rook KS, et al. Dyadic collaboration in shared health behavior change: the effects of a randomized trial to test a lifestyle intervention for high-risk Latinas. *Health Psychology* 2014;33(6):566-75. doi: <http://dx.doi.org/10.1037/hea0000063>
30. Khosravizade Tabasi H, Madarshahian F, Khoshniat Nikoo M, et al. Impact of family support improvement behaviors on anti diabetic medication adherence and cognition in type 2 diabetic patients. *J* 2014;13(1):113. doi: <http://dx.doi.org/10.1186/s40200-014-0113-2>
31. Kasteleyn MJ, Vos RC, Rutten GEH. Tailored support for type 2 diabetes patients with a first acute coronary event after discharge from hospital: Results of a RCT in primary care. *Diabetologia* 2014;1):S442. doi: <http://dx.doi.org/10.1007/s00125-014-3355-0>
32. Trief PM, Fisher L, Sandberg J, et al. A couples intervention for type 2 diabetes: Diabetes support project. *Diabetes* 2015;64(5):A215.
33. Greene N, Eaton S, Hoag J. Effect of family-focused dsme on physiological outcomes in african americans with type 2 diabetes. *Diabetes* 2015;64(5):A54.



- 1  
2  
3  
4 34. Samuel-Hodge CD, Holder-Cooper JC, Gizlice Z, et al. Family PArtners in Lifestyle Support (PALS):  
5 Family-based weight loss for African American adults with type 2 diabetes. *Obesity (Silver*  
6 *Spring)* 2017;25(1):45-55. doi: 10.1002/oby.21700
- 7 35. Wichit N, Mnatzaganian G, Courtney M, et al. Randomized controlled trial of a family-oriented self-  
8 management program to improve self-efficacy, glycemic control and quality of life among Thai  
9 individuals with Type 2 diabetes. *Diabetes Res Clin Pract* 2017;123:37-48. doi:  
10 10.1016/j.diabres.2016.11.013
- 11 36. Baig AA, Benitez A, Locklin CA, et al. Picture Good Health: A Church-Based Self-Management  
12 Intervention Among Latino Adults with Diabetes. *J Gen Intern Med* 2015;30(10):1481-90. doi:  
13 10.1007/s11606-015-3339-x
- 14 37. Baig AA, Benitez A, Locklin CA, et al. Picture Good Health: A Church-Based Self-Management  
15 Intervention Among Latino Adults with Diabetes. *J Gen Intern Med* 2015;30(10):1481-90. doi:  
16 <https://dx.doi.org/10.1007/s11606-015-3339-x>
- 17 38. Samuel-Hodge CD, Holder-Cooper JC, Gizlice Z, et al. Family PArtners in Lifestyle Support (PALS):  
18 family-based weight loss for African American adults with type 2 diabetes. *Obesity (silver spring,*  
19 *md)* 2017;25(1):45-55.
- 20 39. Trief PM, Fisher L, Sandberg J, et al. Health and psychosocial outcomes of a telephonic couples  
21 behavior change intervention in patients with poorly controlled type 2 diabetes: a randomized  
22 clinical trial. *Diabetes Care* 2016;39(12):2165-73.
- 23 40. Wichit N, Mnatzaganian G, Courtney M, et al. Randomized controlled trial of a family-oriented self-  
24 management program to improve self-efficacy, glycemic control and quality of life among Thai  
25 individuals with Type 2 diabetes. *Diabetes Res Clin Pract* 2017;123:37-48. doi:  
26 <https://dx.doi.org/10.1016/j.diabres.2016.11.013>
- 27 41. McEwen MM, Pasvogel A, Murdaugh C, et al. 5. Effects of a Family Intervention to Promote Mexican  
28 American Family Social Capital for Diabetes Management. *Nursing Outlook* 2017;65(1):132-32.  
29 doi: 10.1016/j.outlook.2016.11.011
- 30 42. McEwen MM, Pasvogel A, Murdaugh C, et al. Effects of a Family-based Diabetes Intervention on  
31 Behavioral and Biological Outcomes for Mexican American Adults. *Diabetes Educ*  
32 2017;43(3):272-85. doi: 10.1177/0145721717706031
- 33 43. Pearce KAL, M. M.;Shelton, B. J.;Schoenberg, N. E.;Williamson, M. A.;Barron, M. A.;Houlihan, J.  
34 M.;Kentucky Ambulatory, Network. Cardiovascular risk education and social support (CaRESS):  
35 report of a randomized controlled trial from the Kentucky Ambulatory Network (KAN). *J Am*  
36 *Board Fam Med* 2008;21(4):269-81. doi: <http://dx.doi.org/10.3122/jabfm.2008.04.080007>
- 37 44. Samuel-Hodge CD, Keyserling TC, Park S, et al. A randomized trial of a church-based diabetes self-  
38 management program for African Americans with type 2 diabetes. *Diabetes Educator*  
39 2009;35(3):439-54. doi: <http://dx.doi.org/10.1177/0145721709333270>
- 40 45. Pearce KA, Love MM, Shelton BJ, et al. Cardiovascular risk education and social support (CaRESS):  
41 report of a randomized controlled trial from the Kentucky Ambulatory Network (KAN). *J Am*  
42 *Board Fam Med* 2008;21(4):269-81. doi: <http://dx.doi.org/10.3122/jabfm.2008.04.080007>
- 43 46. Bech P, Gudex C, Johansen KS. The WHO (Ten) Well-Being Index: validation in diabetes. *Psychother*  
44 *Psychosom* 1996;65(4):183-90.
- 45 47. Bradley C. The 12-Item Well-Being Questionnaire: origins, current stage of development, and  
46 availability. *Diabetes Care* 2000;23(6):875.
- 47 48. Ware JE, Jr., Sherbourne CD. The MOS 36-item short-form health survey (SF-36). I. Conceptual  
48 framework and item selection. *Med Care* 1992;30(6):473-83.
- 49 49. Ware JE. The SF-12v2TM how to score version 2 of the SF-12® health survey:(with a supplement  
50 documenting version 1): Quality Metric 2002.
- 51  
52  
53  
54  
55  
56  
57  
58  
59  
60

- 1  
2  
3  
4  
5  
6  
7  
8  
9  
10  
11  
12  
13  
14  
15  
16  
17  
18  
19  
20  
21  
22  
23  
24  
25  
26  
27  
28  
29  
30  
31  
32  
33  
34  
35  
36  
37  
38  
39  
40  
41  
42  
43  
44  
45  
46  
47  
48  
49  
50  
51  
52  
53  
54  
55  
56  
57  
58  
59  
60
50. Polonsky WH, Fisher L, Earles J, et al. Assessing psychosocial distress in diabetes: development of the diabetes distress scale. *Diabetes Care* 2005;28(3):626-31.
51. van Dam HA, van der Horst FG, Knoops L, et al. Social support in diabetes: a systematic review of controlled intervention studies. *Patient Educ Couns* 2005;59(1):1-12. doi: 10.1016/j.pec.2004.11.001 [published Online First: 2005/10/04]
52. Devereaux PJ, Choi PT, El-Dika S, et al. An observational study found that authors of randomized controlled trials frequently use concealment of randomization and blinding, despite the failure to report these methods. *Journal of clinical epidemiology* 2004;57(12):1232-6. doi: 10.1016/j.jclinepi.2004.03.017 [published Online First: 2004/12/25]
53. Shor E, Roelfs DJ, Yogev T. The strength of family ties: A meta-analysis and meta-regression of self-reported social support and mortality. *Social Networks* 2013;35(4):626-38. doi: <http://dx.doi.org/10.1016/j.socnet.2013.08.004>
54. Zhang XP, Norris SL, Gregg EW, et al. Social support and mortality among older persons with diabetes. *Diabetes Educator* 2007;33(2):273-81. doi: 10.1177/0145721707299265
55. Ellwardt L, van Tilburg T, Aartsen M, et al. Personal networks and mortality risk in older adults: a twenty-year longitudinal study. *PLoS One* 2015;10(3):e0116731. doi: 10.1371/journal.pone.0116731
56. Vassilev I, Rogers A, Kennedy A, et al. Social network type and long-term condition management support: A cross-sectional study in six European countries. *PLoS ONE* 2016;11 (8):e0161027. doi: <http://dx.doi.org/10.1371/journal.pone.0161027>
57. Steptoe A, Owen N, Kunz-Ebrecht SR, et al. Loneliness and neuroendocrine, cardiovascular, and inflammatory stress responses in middle-aged men and women. *Psychoneuroendocrinology* 2004;29(5):593-611. doi: 10.1016/S0306-4530(03)00086-6
58. Steptoe A, Hackett RA, Lazzarino AI, et al. Disruption of multisystem responses to stress in type 2 diabetes: investigating the dynamics of allostatic load. *Proc Natl Acad Sci U S A* 2014;111(44):15693-8. doi: 10.1073/pnas.1410401111 [published Online First: 2014/10/22]
59. Marmot M, Wilkinson R. Social determinants of health: Oxford University Press 2005.

## Tables and Figures

**Figure 1.** Logic model of social self-management

**Figure 2.** PRISMA flow chart

**Figure 3.** Intervention and comparator components

**Figure 4.** Effect of social network interventions on social support, quality of life (QoL) and HbA1c

**Table 1.** Trial and intervention characteristics

1  
2  
3  
4  
5  
6  
7  
8  
9  
10  
11  
12  
13  
14  
15  
16  
17  
18  
19  
20  
21  
22  
23  
24  
25  
26  
27  
28  
29  
30  
31  
32  
33  
34  
35  
36  
37  
38  
39  
40  
41  
42  
43  
44  
45  
46  
47  
48  
49  
50  
51  
52  
53  
54  
55  
56  
57  
58  
59  
60

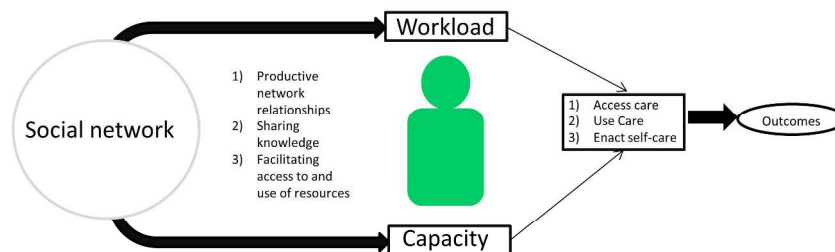

Figure 1. Framework for Social Networks' Influence on Self-management

Caption: This framework is based off the Cumulative Complexity Model<sup>1</sup> and a meta-synthesis identifying the mechanisms by which social networks influence chronic disease self management.<sup>4</sup> *Workload* is composed of patients' *life demands* and healthcare demands with their associated *burden of treatment*. *Capacity* refers to patients' resources and abilities. A balance between workload and capacity should support patients' ability to *access* and *use care* and *enact self-care* and achieve improved health *outcomes*. Following Foss et al.,<sup>4</sup> social networks can impact (positively and negatively) both workload and capacity by sharing knowledge and experiences, facilitating access to and use of resources. Their efficacy depends on the ability to maintain productive network relationships.

Figure 1. Framework for Social Networks' Influence on Self-management

254x190mm (300 x 300 DPI)

ew only

1  
2  
3  
4  
5  
6  
7  
8  
9  
10  
11  
12  
13  
14  
15  
16  
17  
18  
19  
20  
21  
22  
23  
24  
25  
26  
27  
28  
29  
30  
31  
32  
33  
34  
35  
36  
37  
38  
39  
40  
41  
42  
43  
44  
45  
46  
47  
48  
49  
50  
51  
52  
53  
54  
55  
56  
57  
58  
59  
60



Figure 2. PRISMA flow chart.  
\*reasons not mutually exclusive

Figure 2. PRISMA flow chart

254x190mm (300 x 300 DPI)

ew only

1  
2  
3  
4  
5  
6  
7  
8  
9  
10  
11  
12  
13  
14  
15  
16  
17  
18  
19  
20  
21  
22  
23  
24  
25  
26  
27  
28  
29  
30  
31  
32  
33  
34  
35  
36  
37  
38  
39  
40  
41  
42  
43  
44  
45  
46  
47  
48  
49  
50  
51  
52  
53  
54  
55  
56  
57  
58  
59  
60

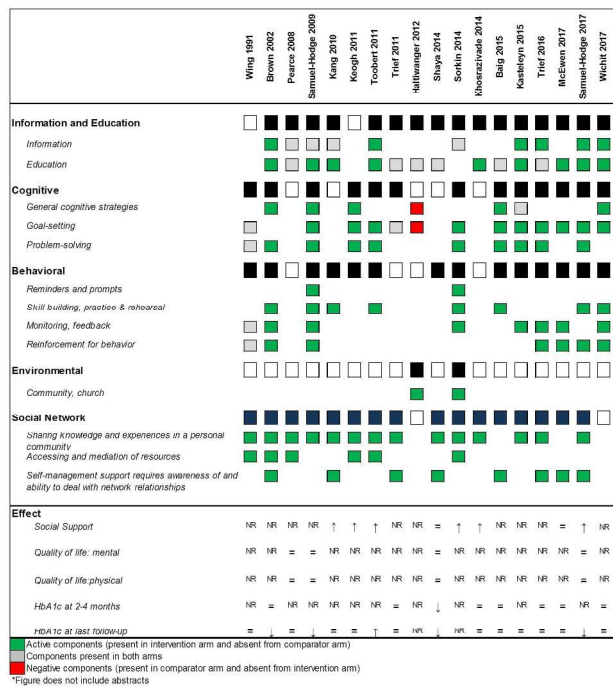

Figure 3. Intervention and comparator components

254x190mm (300 x 300 DPI)

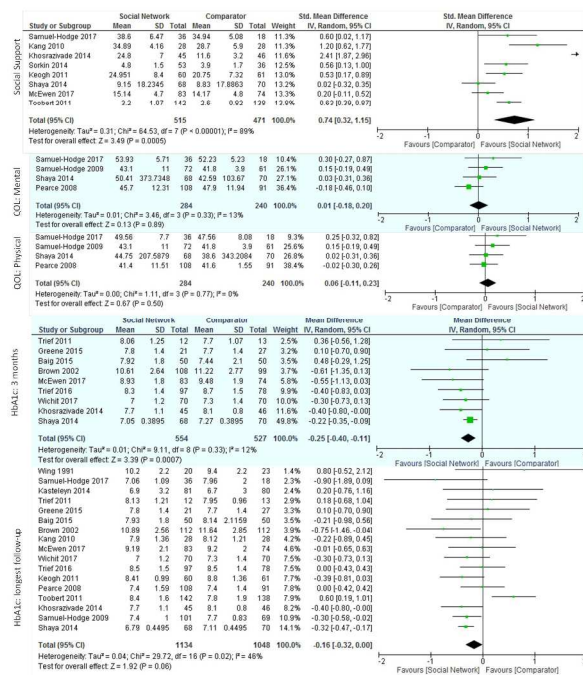

Figure 4. Effect of social network interventions on social support, quality of life (QoL) and HbA1c

Figure 4. Efficacy of social network interventions

254x190mm (300 x 300 DPI)

1  
2  
3  
4  
5  
6  
7  
8  
9  
10  
11  
12  
13  
14  
15  
16  
17  
18  
19  
20  
21  
22  
23  
24  
25  
26  
27  
28  
29  
30  
31  
32  
33  
34  
35  
36  
37  
38  
39  
40  
41  
42  
43  
44  
45  
46  
47  
48  
49  
50  
51  
52  
53  
54  
55  
56  
57  
58  
59  
60

**Supplemental Material**

**A systematic review of social network interventions in patients with type 2 diabetes**



1  
2  
3  
4  
5  
6  
7  
8  
9  
10  
11  
12  
13  
14  
15  
16  
17  
18  
19  
20  
21  
22  
23  
24  
25  
26  
27  
28  
29  
30  
31  
32  
33  
34  
35  
36  
37  
38  
39  
40  
41  
42  
43  
44  
45  
46  
47  
48  
49

**Ovid MEDLINE(R) In-Process & Other Non-Indexed Citations and Ovid MEDLINE(R) 1946 to Present**

|   |                                                                                                                                                                                                                                                                                                |        |          |
|---|------------------------------------------------------------------------------------------------------------------------------------------------------------------------------------------------------------------------------------------------------------------------------------------------|--------|----------|
| 1 | *diabetes mellitus, type 2/ or "type 2 diabet*".tw. or niddm.mp. or t2dm.mp. [mp=title, abstract, original title, name of substance word, subject heading word, keyword heading word, protocol supplementary concept word, rare disease supplementary concept word, unique identifier]         | 114218 | Advanced |
| 2 | ("social network" or "social support").mp. [mp=title, abstract, original title, name of substance word, subject heading word, keyword heading word, protocol supplementary concept word, rare disease supplementary concept word, unique identifier]                                           | 69042  | Advanced |
| 3 | 1 and 2                                                                                                                                                                                                                                                                                        | 663    | Advanced |
| 4 | family relations/ or family conflict/ or intergenerational relations/ or sibling relations/                                                                                                                                                                                                    | 15431  | Advanced |
| 5 | family/ or adult children/ or family relations/                                                                                                                                                                                                                                                | 73608  | Advanced |
| 6 | family role/ or family therapy/                                                                                                                                                                                                                                                                | 7952   | Advanced |
| 7 | 1 and (4 or 5 or 6)                                                                                                                                                                                                                                                                            | 536    | Advanced |
| 8 | (couple or couples or married or spous* or partner*1 or household or neighbor*1).mp. [mp=title, abstract, original title, name of substance word, subject heading word, keyword heading word, protocol supplementary concept word, rare disease supplementary concept word, unique identifier] | 231588 | Advanced |
| 9 | (church* or religious* or husband* or wife* or relatives or "family based").mp. [mp=title, abstract, original title, name of substance word, subject heading word, keyword heading word, protocol supplementary concept                                                                        | 110536 | Advanced |

|    |                                                                                                                                                                                                                                                                                             |      |          |
|----|---------------------------------------------------------------------------------------------------------------------------------------------------------------------------------------------------------------------------------------------------------------------------------------------|------|----------|
|    | word, rare disease supplementary concept word, unique identifier]                                                                                                                                                                                                                           |      |          |
| 10 | 1 and 8                                                                                                                                                                                                                                                                                     | 749  | Advanced |
| 11 | 1 and 9                                                                                                                                                                                                                                                                                     | 1089 | Advanced |
| 12 | 7 or 10 or 11                                                                                                                                                                                                                                                                               | 2151 | Advanced |
| 13 | limit 12 to randomized controlled trial                                                                                                                                                                                                                                                     | 87   | Advanced |
| 14 | 12 and intervention*.mp. [mp=title, abstract, original title, name of substance word, subject heading word, keyword heading word, protocol supplementary concept word, rare disease supplementary concept word, unique identifier]                                                          | 290  | Advanced |
| 15 | 12 and (behavior* or behaviour* or adher* or education* or aware* or stigma*).mp. [mp=title, abstract, original title, name of substance word, subject heading word, keyword heading word, protocol supplementary concept word, rare disease supplementary concept word, unique identifier] | 573  | Advanced |
| 16 | 13 or 14                                                                                                                                                                                                                                                                                    | 330  | Advanced |
| 17 | 3 or 7 or 12                                                                                                                                                                                                                                                                                | 2695 | Advanced |
| 18 | intervention*.mp. and 17 [mp=title, abstract, original title, name of substance word, subject heading word, keyword heading word, protocol supplementary concept word, rare disease supplementary concept word, unique identifier]                                                          | 512  | Advanced |
| 19 | 13 or 18                                                                                                                                                                                                                                                                                    | 552  | Advanced |

1  
2  
3  
4  
5  
6  
7  
8  
9  
10  
11  
12  
13  
14  
15  
16  
17  
18  
19  
20  
21  
22  
23  
24  
25  
26  
27  
28  
29  
30  
31  
32  
33  
34  
35  
36  
37  
38  
39  
40  
41  
42  
43  
44  
45  
46  
47  
48  
49

|    |                                                                                                                                                                                                                              |     |          |
|----|------------------------------------------------------------------------------------------------------------------------------------------------------------------------------------------------------------------------------|-----|----------|
| 20 | 17 and random*.mp. [mp=title, abstract, original title, name of substance word, subject heading word, keyword heading word, protocol supplementary concept word, rare disease supplementary concept word, unique identifier] | 338 | Advanced |
| 21 | 19 or 20                                                                                                                                                                                                                     | 676 | Advanced |
| 22 | remove duplicates from 21                                                                                                                                                                                                    | 665 |          |

CENTRAL – same strategy – 205

| Embase 1988 to 2017 Week 16 |                                                                                                                                                                                                                      |         |             |
|-----------------------------|----------------------------------------------------------------------------------------------------------------------------------------------------------------------------------------------------------------------|---------|-------------|
| #                           | Searches                                                                                                                                                                                                             | Results | Search Type |
| 1                           | *diabetes mellitus, type 2/ or "type 2 diabet*".tw. or niddm.mp. or t2dm.mp. [mp=title, abstract, heading word, drug trade name, original title, device manufacturer, drug manufacturer, device trade name, keyword] | 142471  | Advanced    |
| 2                           | ("social network" or "social support").mp. [mp=title, abstract, heading word, drug trade name, original title, device manufacturer, drug manufacturer, device trade name, keyword]                                   | 79400   | Advanced    |
| 3                           | 1 and 2                                                                                                                                                                                                              | 645     | Advanced    |
| 4                           | family relations/ or family conflict/ or intergenerational relations/ or sibling relations/                                                                                                                          | 69298   | Advanced    |

|    |                                                                                                                                                                                                                              |        |          |
|----|------------------------------------------------------------------------------------------------------------------------------------------------------------------------------------------------------------------------------|--------|----------|
| 5  | family/ or adult children/ or family relations/                                                                                                                                                                              | 70584  | Advanced |
| 6  | family role/ or family therapy/                                                                                                                                                                                              | 8709   | Advanced |
| 7  | 1 and (4 or 5 or 6)                                                                                                                                                                                                          | 439    | Advanced |
| 8  | (couple or couples or married or spous* or partner*1 or household or neighbor*1).mp. [mp=title, abstract, heading word, drug trade name, original title, device manufacturer, drug manufacturer, device trade name, keyword] | 265365 | Advanced |
| 9  | (church* or religious* or husband* or wife* or relatives or "family based").mp. [mp=title, abstract, heading word, drug trade name, original title, device manufacturer, drug manufacturer, device trade name, keyword]      | 109824 | Advanced |
| 10 | 1 and 8                                                                                                                                                                                                                      | 1041   | Advanced |
| 11 | 1 and 9                                                                                                                                                                                                                      | 1305   | Advanced |
| 12 | 7 or 10 or 11                                                                                                                                                                                                                | 2620   | Advanced |
| 13 | 3 or 12                                                                                                                                                                                                                      | 3134   | Advanced |
| 14 | 13 and intervention*.mp. [mp=title, abstract, heading word, drug trade name, original title, device manufacturer, drug manufacturer, device trade name, keyword]                                                             | 653    | Advanced |
| 15 | randomized controlled trial/                                                                                                                                                                                                 | 376080 | Advanced |
| 16 | 13 and 15                                                                                                                                                                                                                    | 158    | Advanced |

1  
2  
3  
4  
5  
6  
7  
8  
9  
10  
11  
12  
13  
14  
15  
16  
17  
18  
19  
20  
21  
22  
23  
24  
25  
26  
27  
28  
29  
30  
31  
32  
33  
34  
35  
36  
37  
38  
39  
40  
41  
42  
43  
44  
45  
46  
47  
48  
49

|    |                                                                                                                                                            |        |          |
|----|------------------------------------------------------------------------------------------------------------------------------------------------------------|--------|----------|
| 17 | 13 and random*.mp. [mp=title, abstract, heading word, drug trade name, original title, device manufacturer, drug manufacturer, device trade name, keyword] | 410    | Advanced |
| 18 | 14 or 16 or 17                                                                                                                                             | 847    | Advanced |
| 19 | limit 18 to human                                                                                                                                          | 796    | Advanced |
| 20 | non insulin dependent diabetes mellitus/                                                                                                                   | 166150 | Advanced |
| 21 | 19 and 20                                                                                                                                                  | 665    |          |

**PsycINFO** 1987 to April Week 2 2017

| # | Searches                                                                                                                                                                           | Results | Search Type |
|---|------------------------------------------------------------------------------------------------------------------------------------------------------------------------------------|---------|-------------|
| 1 | diabetes mellitus/                                                                                                                                                                 | 4189    | Advanced    |
| 2 | 1 and ("type 2" or noninsulin* or "non insulin" or niddm or t2d or t2dm).mp. [mp=title, abstract, heading word, table of contents, key concepts, original title, tests & measures] | 1815    | Advanced    |
| 3 | exp social support/                                                                                                                                                                | 26965   | Advanced    |
| 4 | social networks/ or exp social groups/ or exp social interaction/ or exp social support/ or exp support groups/                                                                    | 276211  | Advanced    |
| 5 | 2 and (3 or 4)                                                                                                                                                                     | 90      | Advanced    |

|    |                                                                                                                                            |        |          |
|----|--------------------------------------------------------------------------------------------------------------------------------------------|--------|----------|
| 6  | exp Family Therapy/ or family.mp. or exp Family Relations/ or exp Family/ or exp Family Systems Theory/ or exp Family Structure/           | 282330 | Advanced |
| 7  | couples/ or cohabitation/ or dyads/ or significant others/ or exp spouses/                                                                 | 25371  | Advanced |
| 8  | 2 and (6 or 7)                                                                                                                             | 195    | Advanced |
| 9  | 5 or 8                                                                                                                                     | 258    | Advanced |
| 10 | limit 9 to ("0830 systematic review" or 1200 meta analysis)                                                                                | 1      | Advanced |
| 11 | 9 and (intervention* or random*).mp. [mp=title, abstract, heading word, table of contents, key concepts, original title, tests & measures] | 78     | Advanced |
| 12 | 10 or 11                                                                                                                                   | 79     | Advanced |
| 13 | limit 12 to all journals                                                                                                                   | 55     |          |

## CINAHL

| #   | Query                                                             | Limiters/Expanders            | Last Run Via                                                                                                    | Results |
|-----|-------------------------------------------------------------------|-------------------------------|-----------------------------------------------------------------------------------------------------------------|---------|
| S12 | S8 AND S11                                                        | Search modes - Boolean/Phrase | Interface - EBSCOhost Research Databases<br>Search Screen - Advanced Search<br>Database - CINAHL with Full Text | 9       |
| S11 | S5 AND S10                                                        | Search modes - Boolean/Phrase | Interface - EBSCOhost Research Databases<br>Search Screen - Advanced Search<br>Database - CINAHL with Full Text | 78      |
| S10 | (MH "Family+") OR (MH "Family Relations+") OR (MH "Patient-Family | Search modes - Boolean/Phrase | Interface - EBSCOhost Research Databases<br>Search Screen - Advanced Search                                     | 123,032 |

|    |                                                                                                                                                           |                               |                                                                                                                 |         |
|----|-----------------------------------------------------------------------------------------------------------------------------------------------------------|-------------------------------|-----------------------------------------------------------------------------------------------------------------|---------|
|    | Relations") OR (MH "Nuclear Family+") OR (MH "Family Attitudes+")                                                                                         |                               | Database - CINAHL with Full Text                                                                                |         |
| S9 | S5 AND S8                                                                                                                                                 | Search modes - Boolean/Phrase | Interface - EBSCOhost Research Databases<br>Search Screen - Advanced Search<br>Database - CINAHL with Full Text | 75      |
| S8 | S6 OR S7                                                                                                                                                  | Search modes - Boolean/Phrase | Interface - EBSCOhost Research Databases<br>Search Screen - Advanced Search<br>Database - CINAHL with Full Text | 129,321 |
| S7 | (MH "Intervention Trials") OR "intervention"                                                                                                              | Search modes - Boolean/Phrase | Interface - EBSCOhost Research Databases<br>Search Screen - Advanced Search<br>Database - CINAHL with Full Text | 111,076 |
| S6 | (MH "Randomized Controlled Trials")                                                                                                                       | Search modes - Boolean/Phrase | Interface - EBSCOhost Research Databases<br>Search Screen - Advanced Search<br>Database - CINAHL with Full Text | 25,142  |
| S5 | S1 AND S4                                                                                                                                                 | Search modes - Boolean/Phrase | Interface - EBSCOhost Research Databases<br>Search Screen - Advanced Search<br>Database - CINAHL with Full Text | 385     |
| S4 | S2 OR S3                                                                                                                                                  | Search modes - Boolean/Phrase | Interface - EBSCOhost Research Databases<br>Search Screen - Advanced Search<br>Database - CINAHL with Full Text | 48,947  |
| S3 | (MH "Young Adult Social Support Index") OR (MH "Social Support Index") OR (MH "Social Support (Iowa NOC)") OR (MH "Norbeck Social Support Questionnaire") | Search modes - Boolean/Phrase | Interface - EBSCOhost Research Databases<br>Search Screen - Advanced Search<br>Database - CINAHL with Full Text | 289     |
| S2 | (MH "Social Networks") OR (MH "Social Network Analysis (Saba CCC)") OR (MH "Support, Psychosocial+")                                                      | Search modes - Boolean/Phrase | Interface - EBSCOhost Research Databases<br>Search Screen - Advanced Search<br>Database - CINAHL with Full Text | 48,840  |
| S1 | (MH "Diabetes Mellitus, Type 2")                                                                                                                          | Search modes - Boolean/Phrase | Interface - EBSCOhost Research Databases<br>Search Screen - Advanced Search<br>Database - CINAHL with Full Text | 26,607  |

Supplement Table S1. Search strategy

| Study                | Notable inclusion criteria                                                                      | Intervention |                        |                                     | Control |                        |                                     |
|----------------------|-------------------------------------------------------------------------------------------------|--------------|------------------------|-------------------------------------|---------|------------------------|-------------------------------------|
|                      |                                                                                                 | N            | Mean Age in years (SD) | Mean duration of T2DM in years (SD) | N       | Mean Age in years (SD) | Mean duration of T2DM in years (SD) |
| Wing 1991            | >20% above ideal above weight                                                                   | 25           | 53.6 (7.7)             | NR                                  | 24      | 51.2 (7.3)             | NR                                  |
| Brown 2002           | None                                                                                            | 128          | 54.7 (8.2)             | 7.6 (5.8)                           | 128     | 53.3 (8.3)             | 8.1 (6.9)                           |
| Sammuel - Hodge 2002 | A1C>8%                                                                                          | 117          | 57 (9.7)               | 9 (NR)                              | 84      | 61.3 (11.9)            | 11 (NR)                             |
| Pearce 2008          | No history of ketoacidosis                                                                      | 108          | 61.2 (10.59)           | NR                                  | 91      | 63.1 (8.63)            | NR                                  |
| Kang 2010            | At least two of last three A1C reading $\geq$ 7%; used oral antidiabetic agents only            | 33           | 55.3 (7.7)             | 3.8 (3.2)                           | 34      | 51.7 (8.5)             | 4.4 (3)                             |
| Toobert 2011         | 2 out of 3 LAST A1Cs $>$ 8%                                                                     | 142          | 55.6 (9.7)             | 8.4 (6.5)                           | 138     | 58.7 (10.3)            | 10.4 (9.8)                          |
| Greene 2015          | Latinas                                                                                         | 21           | NR                     | NR                                  | 27      | NR                     | NR                                  |
| Keogh 2011           | Married for $>$ 1 year; A1C $>$ 7.3%                                                            | 60           | 59.96 (11.67)          | 9.17 (7.1)                          | 61      | 57.9 (11.34)           | 9.65 (6.45)                         |
| Trief 2011           | $>$ 60 years old; Mexican American; documented difficulties with health habits                  | 12           | 60.33 (8.63)           | 8.63 (NR)                           | 12      | 61.08 (9.27)           | 9.27 (NR)                           |
| Haltiwanger 2012     | $>$ 30 years old; medium or low adherence; low social support                                   | 12           | NR                     | NR                                  | 36      | NR                     | NR                                  |
| Khosravizade 2014    | A1C $>$ 7% or FBS $>$ 110mg/dl                                                                  | 45           | 52.93 (7.62)           | 9.71 (6.75)                         | 46      | 54.13 (7.56)           | 11.39 (5.4)                         |
| Shaya 2014           | Latina; mother to overweight woman                                                              | 68           | 53.9 (NR)              | 9.2 (8.6)                           | 70      | 51.9 (NR)              | 8.8 (8.2)                           |
| Sorkin 2014          | African American                                                                                | 53           | 52.7 (6.9)             | 9.8 (NR)                            | 36      | 52.7 (6.9)             | 9.8 (NR)                            |
| Baig 2015            | Diagnosis of diabetes by a physician                                                            | 50           | 51.7 (11.6)            | 8.7 (8.67)                          | 50      | 55.7 (11.4)            | 7.8 (7.14)                          |
| Kasteleyn 2015       | $>$ 35 years old; within 2 weeks from hospital discharge after first acute coronary event       | 101          | 66 (9.3)               | 7.0 (2.8-16)                        | 100     | 65.6 (9.4)             | 8.5 (5-15)                          |
| Trief 2016           | Married or with partner for $>$ 1 year; A1C $>$ 7.5%                                            | 97           | 57.8 (10.8)            | 12.8 (8.5)                          | 78      | 56.9 (10.4)            | 12.6 (8.3)                          |
| McEwen 2017          | Mexican American                                                                                | 83           | 53.64 (9.6)            | 11.92                               | 74      | 53.41 (8.4)            | 11.05                               |
| Samuel-Hodge 2017    | African American; overweight or obese; A1C $\leq$ 11%                                           | 36           | 54.6 (10.55)           | 7.3 (NR)                            | 18      | 52.8 (8.56)            | 5.4 (NR)                            |
| Wichit 2017          | $\geq$ 35 years old; T2DM duration of $\geq$ 6 months and living in Thachang District, Thailand | 70           | 61.3 (11.6)            | 6.0 (4.7) 6.0 (4.7)                 | 70      | 55.5 (10.5)            | 5.4 (4.3)                           |

Supplemental Table S2. Trial inclusion criteria and participant baseline characteristics



|                   | Random sequence generation (selection bias) | Allocation concealment (selection bias) | Blinding of participants and personnel (performance bias) | Blinding of outcome assessment (detection bias) | Incomplete outcome data (attrition bias) | Selective reporting (reporting bias) | Other bias |
|-------------------|---------------------------------------------|-----------------------------------------|-----------------------------------------------------------|-------------------------------------------------|------------------------------------------|--------------------------------------|------------|
| Baig 2015         | ?                                           | ?                                       | -                                                         | ?                                               | -                                        | +                                    | ?          |
| Brown 2002        | ?                                           | ?                                       | -                                                         | +                                               | +                                        | +                                    | ?          |
| Greene 2015       | ?                                           | ?                                       | -                                                         | ?                                               | ?                                        | ?                                    | ?          |
| Haltiwanger 2012  | +                                           | ?                                       | -                                                         | ?                                               | -                                        | -                                    | ?          |
| Kang 2010         | +                                           | ?                                       | -                                                         | ?                                               | +                                        | +                                    | ?          |
| Kasteleyn 2014    | +                                           | ?                                       | -                                                         | ?                                               | +                                        | +                                    | ?          |
| Keogh 2011        | +                                           | +                                       | -                                                         | +                                               | +                                        | -                                    | ?          |
| Khosrazivade 2014 | ?                                           | ?                                       | -                                                         | ?                                               | +                                        | ?                                    | ?          |
| McEwen 2017       | +                                           | +                                       | -                                                         | -                                               | -                                        | -                                    | ?          |
| Pearce 2008       | +                                           | +                                       | -                                                         | ?                                               | ?                                        | -                                    | ?          |
| Samuel-Hodge 2009 | +                                           | +                                       | -                                                         | +                                               | -                                        | +                                    | ?          |
| Samuel-Hodge 2017 | +                                           | ?                                       | -                                                         | +                                               | +                                        | +                                    | ?          |
| Shaya 2014        | -                                           | ?                                       | -                                                         | ?                                               | -                                        | +                                    | ?          |
| Sorkin 2014       | +                                           | +                                       | -                                                         | ?                                               | +                                        | +                                    | ?          |
| Toobert 2011      | ?                                           | +                                       | -                                                         | +                                               | +                                        | +                                    | ?          |
| Trief 2011        | ?                                           | ?                                       | -                                                         | +                                               | -                                        | +                                    | ?          |
| Trief 2016        | +                                           | +                                       | -                                                         | +                                               | -                                        | -                                    | -          |
| Wichit 2017       | +                                           | -                                       | -                                                         | +                                               | +                                        | +                                    | ?          |
| Wing 1991         | ?                                           | ?                                       | -                                                         | ?                                               | +                                        | ?                                    | ?          |

Supplemental Figure S1. Risk of bias of included trials (Cochrane risk of bias tool)

Assessing confidence in the estimates of effect:  
GRADE

| Quality assessment        |                   |                      |                        |              |                      |                      | N <sup>o</sup> of patients   |                | Effect                                       | Quality         | Importance |
|---------------------------|-------------------|----------------------|------------------------|--------------|----------------------|----------------------|------------------------------|----------------|----------------------------------------------|-----------------|------------|
| N <sup>o</sup> of studies | Study design      | Risk of bias         | Inconsistency          | Indirectness | Imprecision          | Other considerations | Social network interventions | Any comparator | Absolute (95% CI)                            |                 |            |
| Social Support            |                   |                      |                        |              |                      |                      |                              |                |                                              |                 |            |
| 8                         | randomised trials | serious <sup>1</sup> | serious <sup>2,3</sup> | not serious  | serious <sup>4</sup> | strong association   | 515                          | 471            | SMD 0.74 higher (0.32 higher to 1.15 higher) | Low to moderate | IMPORTANT  |

CI: Confidence interval; SMD: Standardised mean difference

1. unclear blinding of outcome assessors
2. I<sup>2</sup>=90%
3. non-overlapping CIs
4. confidence interval or estimate effect includes non-important change as well as very important change

| Quality assessment        |                   |                      |                      |              |             |                      | N <sup>o</sup> of patients   |                | Effect                                    | Quality         | Importance |
|---------------------------|-------------------|----------------------|----------------------|--------------|-------------|----------------------|------------------------------|----------------|-------------------------------------------|-----------------|------------|
| N <sup>o</sup> of studies | Study design      | Risk of bias         | Inconsistency        | Indirectness | Imprecision | Other considerations | Social network interventions | Any comparator | Absolute (95% CI)                         |                 |            |
| HbA1c: 3 months           |                   |                      |                      |              |             |                      |                              |                |                                           |                 |            |
| 9                         | randomised trials | serious <sup>1</sup> | not serious          | not serious  | not serious | none                 | 554                          | 527            | MD 0.25 lower (0.40 lower to 0.11 lower)  | Low to very low | IMPORTANT  |
| HbA1c: 5-7 Months         |                   |                      |                      |              |             |                      |                              |                |                                           |                 |            |
| 11                        | randomised trials | serious <sup>1</sup> | serious <sup>2</sup> | not serious  | not serious | none                 | 777                          | 727            | MD 0.24 lower (0.52 lower to 0.03 higher) | Low to very low | IMPORTANT  |

| Quality assessment        |                   |                      |                           |              |                      |                      | N <sup>o</sup> of patients   |                | Effect                                             | Quality         | Importance |
|---------------------------|-------------------|----------------------|---------------------------|--------------|----------------------|----------------------|------------------------------|----------------|----------------------------------------------------|-----------------|------------|
| N <sup>o</sup> of studies | Study design      | Risk of bias         | Inconsistency             | Indirectness | Imprecision          | Other considerations | Social network interventions | Any comparator | Absolute (95% CI)                                  |                 |            |
| HbA1c: 8+ months          |                   |                      |                           |              |                      |                      |                              |                |                                                    |                 |            |
| 3                         | randomised trials | serious <sup>1</sup> | very serious <sup>2</sup> | not serious  | serious <sup>3</sup> | none                 | 355                          | 319            | MD <b>0.1 lower</b><br>(0.84 lower to 0.65 higher) | Low to very low | IMPORTANT  |
| HbA1c: Longest follow-up  |                   |                      |                           |              |                      |                      |                              |                |                                                    |                 |            |
| 17                        | randomised trials | serious <sup>1</sup> | not serious               | not serious  | not serious          | none                 | 1134                         | 1048           | MD <b>0.16 lower</b><br>(0.32 lower to 0)          | Low to very low | IMPORTANT  |

CI: Confidence interval; MD: Mean difference

1. unclear allocation concealment
2. high I2
3. large CI

| Quality assessment                  |                   |                      |                             |              |                           |                      | N <sup>o</sup> of patients   |                | Effect                                                | Quality         | Importance |
|-------------------------------------|-------------------|----------------------|-----------------------------|--------------|---------------------------|----------------------|------------------------------|----------------|-------------------------------------------------------|-----------------|------------|
| N <sup>o</sup> of studies           | Study design      | Risk of bias         | Inconsistency               | Indirectness | Imprecision               | Other considerations | Social network interventions | Any comparator | Absolute (95% CI)                                     |                 |            |
| Well-being                          |                   |                      |                             |              |                           |                      |                              |                |                                                       |                 |            |
| 2                                   | randomised trials | serious <sup>1</sup> | very serious <sup>2,3</sup> | not serious  | very serious <sup>4</sup> | none                 | 141                          | 141            | SMD <b>0.62 higher</b><br>(0.13 lower to 1.37 higher) | Low to very low | IMPORTANT  |
| Quality of Life: Physical Component |                   |                      |                             |              |                           |                      |                              |                |                                                       |                 |            |
| 4                                   | randomised trials | serious <sup>1</sup> | not serious                 | not serious  | not serious               | none                 | 284                          | 240            | SMD <b>0.06 higher</b><br>(0.11 lower to 0.23 higher) | Low to very low | IMPORTANT  |
| Quality of Life: Mental Component   |                   |                      |                             |              |                           |                      |                              |                |                                                       |                 |            |

| Quality assessment |                   |                      |               |              |             |                      | № of patients                |                | Effect                                     | Quality         | Importance |
|--------------------|-------------------|----------------------|---------------|--------------|-------------|----------------------|------------------------------|----------------|--------------------------------------------|-----------------|------------|
| № of studies       | Study design      | Risk of bias         | Inconsistency | Indirectness | Imprecision | Other considerations | Social network interventions | Any comparator | Absolute (95% CI)                          |                 |            |
| 4                  | randomised trials | serious <sup>1</sup> | not serious   | not serious  | not serious | none                 | 284                          | 240            | SMD 0.01 lower (0.18 lower to 0.20 higher) | Low to very low | IMPORTANT  |

CI: Confidence interval; SMD: Standardised mean difference

1. unclear allocation concealment
2. high I2
3. differences in scales used
4. very wide CI

Supplemental Table S3. GRADE assessment

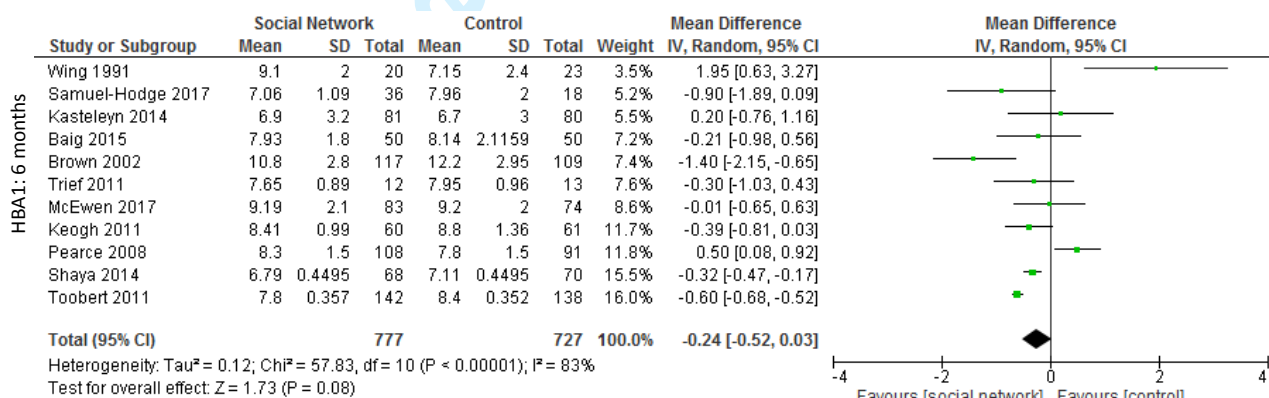

Supplemental Figure S2. Effect of social network intervention on HbA1c at 6 months follow-up

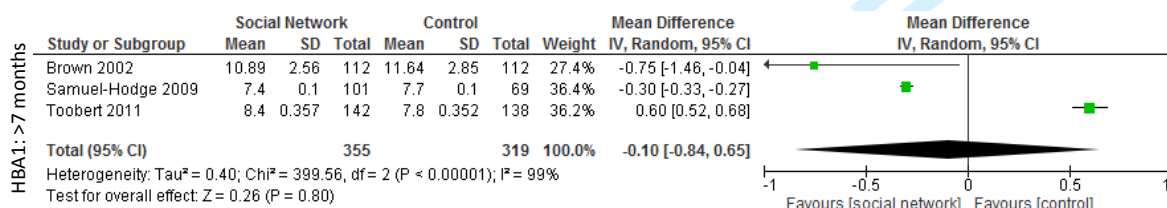

Supplemental Figure S3. Effect of social network intervention on HbA1c at 8+ months follow-up

| <b>Subgroup Analyses</b>            |                                                               |                                                                          |                                |                                                               |                                                                          |                                |
|-------------------------------------|---------------------------------------------------------------|--------------------------------------------------------------------------|--------------------------------|---------------------------------------------------------------|--------------------------------------------------------------------------|--------------------------------|
|                                     | <b>Hba1c at last follow-up</b>                                |                                                                          |                                | <b>Social support at last follow-up</b>                       |                                                                          |                                |
|                                     | <b>Subgroup</b><br><i>effect size (95% CI); I<sup>2</sup></i> | <b>Comparison subgroup</b><br><i>effect size (95% CI); I<sup>2</sup></i> | <b>P-value for interaction</b> | <b>Subgroup</b><br><i>effect size (95% CI); I<sup>2</sup></i> | <b>Comparison subgroup</b><br><i>effect size (95% CI); I<sup>2</sup></i> | <b>P-value for interaction</b> |
| <b>Patient characteristics</b>      |                                                               |                                                                          |                                |                                                               |                                                                          |                                |
| Mean baseline                       | -0.08 (-0.38, 0.23);                                          | -0.28 (-0.40, -0.16);                                                    |                                | 0.89 (0.39, 1.38);                                            | 0.26 (-0.30, 0.82);                                                      |                                |
| HbA1c > 8%                          | 62%                                                           | 0%                                                                       | 0.22                           | 90%                                                           | 65%                                                                      | 0.10                           |
| <b>Intervention characteristics</b> |                                                               |                                                                          |                                |                                                               |                                                                          |                                |
| Self-selected social network        | -0.20 (-0.41, 0.02);<br>59%                                   | -0.14 (-0.35, 0.06); 0%                                                  | 0.73                           | 0.77 (0.29, 1.24);<br>91%                                     | 0.56 (0.13, 1.0); NA                                                     | 0.54                           |
| Household member                    | -0.07 (-0.29, 0.014);<br>47%                                  | -0.32 (-0.45, -0.19);<br>0%                                              | 0.05                           | 0.96 (0.36, 1.55);<br>92%                                     | 0.35 (-0.05, 0.76);<br>63%                                               | 0.10                           |
| Contact time >585 minutes           | -0.17 (-0.38, 0.04);<br>5%                                    | -0.34 (-0.59, -0.09);<br>0%                                              | 0.30                           | 0.32 (-0.03, 0.68);<br>27%                                    | 0.82 (0.18, 1.47); 73%                                                   | 0.18                           |
| Underlying framework                | -0.25 (-0.36, -0.15);<br>1%                                   | -0.11 (-0.63, 0.4); 76%                                                  | 0.60                           | 0.34 (0.11, 0.57);<br>43%                                     | 1.39 (0.32, 2.47); 94%                                                   | 0.06                           |
| Dyadic social network reported      | -0.21 (-0.38, -0.04);<br>9%                                   | -0.07 (-0.41, 0.27);<br>77%                                              | 0.46                           | 1.05 (0.38, 1.72);<br>89%                                     | 0.30 (-0.08, 0.67);<br>79%                                               | 0.05                           |
| <b>Trial characteristics</b>        |                                                               |                                                                          |                                |                                                               |                                                                          |                                |
| Low risk of bias                    | -0.18 (-0.49, 0.12);<br>67%                                   | -0.25 (-0.38, -0.13);<br>0%                                              | 0.66                           | 0.59 (0.42, 0.76);<br>0%                                      | 0.94 (-0.03, 1.90);<br>95%                                               | 0.49                           |

Supplemental Table S4. Subgroup analyses

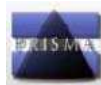

# PRISMA 2009 Checklist

| Section/topic                      | #  | Checklist item                                                                                                                                                                                                                                                                                              | Reported on page # |
|------------------------------------|----|-------------------------------------------------------------------------------------------------------------------------------------------------------------------------------------------------------------------------------------------------------------------------------------------------------------|--------------------|
| <b>TITLE</b>                       |    |                                                                                                                                                                                                                                                                                                             |                    |
| Title                              | 1  | Identify the report as a systematic review, meta-analysis, or both.                                                                                                                                                                                                                                         | 1                  |
| <b>ABSTRACT</b>                    |    |                                                                                                                                                                                                                                                                                                             |                    |
| Structured summary                 | 2  | Provide a structured summary including, as applicable: background; objectives; data sources; study eligibility criteria, participants, and interventions; study appraisal and synthesis methods; results; limitations; conclusions and implications of key findings; systematic review registration number. | 3                  |
| <b>INTRODUCTION</b>                |    |                                                                                                                                                                                                                                                                                                             |                    |
| Rationale                          | 3  | Describe the rationale for the review in the context of what is already known.                                                                                                                                                                                                                              | 5                  |
| Objectives                         | 4  | Provide an explicit statement of questions being addressed with reference to participants, interventions, comparisons, outcomes, and study design (PICOS).                                                                                                                                                  | 6                  |
| <b>METHODS</b>                     |    |                                                                                                                                                                                                                                                                                                             |                    |
| Protocol and registration          | 5  | Indicate if a review protocol exists, if and where it can be accessed (e.g., Web address), and, if available, provide registration information including registration number.                                                                                                                               | 6                  |
| Eligibility criteria               | 6  | Specify study characteristics (e.g., PICOS, length of follow-up) and report characteristics (e.g., years considered, language, publication status) used as criteria for eligibility, giving rationale.                                                                                                      | 6-7                |
| Information sources                | 7  | Describe all information sources (e.g., databases with dates of coverage, contact with study authors to identify additional studies) in the search and date last searched.                                                                                                                                  | 6-7 and supplement |
| Search                             | 8  | Present full electronic search strategy for at least one database, including any limits used, such that it could be repeated.                                                                                                                                                                               | supplement         |
| Study selection                    | 9  | State the process for selecting studies (i.e., screening, eligibility, included in systematic review, and, if applicable, included in the meta-analysis).                                                                                                                                                   | 7-8                |
| Data collection process            | 10 | Describe method of data extraction from reports (e.g., piloted forms, independently, in duplicate) and any processes for obtaining and confirming data from investigators.                                                                                                                                  | 8                  |
| Data items                         | 11 | List and define all variables for which data were sought (e.g., PICOS, funding sources) and any assumptions and simplifications made.                                                                                                                                                                       | 8                  |
| Risk of bias in individual studies | 12 | Describe methods used for assessing risk of bias of individual studies (including specification of whether this was done at the study or outcome level), and how this information is to be used in any data synthesis.                                                                                      | 9                  |
| Summary measures                   | 13 | State the principal summary measures (e.g., risk ratio, difference in means).                                                                                                                                                                                                                               | 9-10               |
| Synthesis of results               | 14 | Describe the methods of handling data and combining results of studies, if done, including measures of consistency (e.g., $I^2$ ) for each meta-analysis.                                                                                                                                                   | 10                 |



# PRISMA 2009 Checklist

Page 1 of 2

| Section/topic                 | #  | Checklist item                                                                                                                                                                                           | Reported on page #                     |
|-------------------------------|----|----------------------------------------------------------------------------------------------------------------------------------------------------------------------------------------------------------|----------------------------------------|
| Risk of bias across studies   | 15 | Specify any assessment of risk of bias that may affect the cumulative evidence (e.g., publication bias, selective reporting within studies).                                                             | 10                                     |
| Additional analyses           | 16 | Describe methods of additional analyses (e.g., sensitivity or subgroup analyses, meta-regression), if done, indicating which were pre-specified.                                                         | 10                                     |
| <b>RESULTS</b>                |    |                                                                                                                                                                                                          |                                        |
| Study selection               | 17 | Give numbers of studies screened, assessed for eligibility, and included in the review, with reasons for exclusions at each stage, ideally with a flow diagram.                                          | 11                                     |
| Study characteristics         | 18 | For each study, present characteristics for which data were extracted (e.g., study size, PICOS, follow-up period) and provide the citations.                                                             | 11-13, table 1                         |
| Risk of bias within studies   | 19 | Present data on risk of bias of each study and, if available, any outcome level assessment (see item 12).                                                                                                | 14, supp fig s1, supp table s3         |
| Results of individual studies | 20 | For all outcomes considered (benefits or harms), present, for each study: (a) simple summary data for each intervention group (b) effect estimates and confidence intervals, ideally with a forest plot. | 14-15, fig 4, supp fig s2, supp fig s3 |
| Synthesis of results          | 21 | Present results of each meta-analysis done, including confidence intervals and measures of consistency.                                                                                                  | 14-15                                  |
| Risk of bias across studies   | 22 | Present results of any assessment of risk of bias across studies (see Item 15).                                                                                                                          | 14, supp fig s1, supp table s3         |
| Additional analysis           | 23 | Give results of additional analyses, if done (e.g., sensitivity or subgroup analyses, meta-regression [see Item 16]).                                                                                    | 14-15, sup table s4                    |
| <b>DISCUSSION</b>             |    |                                                                                                                                                                                                          |                                        |
| Summary of evidence           | 24 | Summarize the main findings including the strength of evidence for each main outcome; consider their relevance to key groups (e.g., healthcare providers, users, and policy makers).                     | 15-17                                  |



# PRISMA 2009 Checklist

1  
2  
3  
4  
5  
6  
7  
8  
9  
10  
11  
12  
13  
14  
15  
16  
17  
18  
19  
20  
21  
22  
23  
24  
25  
26  
27  
28  
29  
30  
31  
32  
33  
34  
35  
36  
37  
38  
39  
40  
41  
42  
43  
44  
45  
46  
47  
48  
49

|                |    |                                                                                                                                                               |       |
|----------------|----|---------------------------------------------------------------------------------------------------------------------------------------------------------------|-------|
| Limitations    | 25 | Discuss limitations at study and outcome level (e.g., risk of bias), and at review-level (e.g., incomplete retrieval of identified research, reporting bias). | 16    |
| Conclusions    | 26 | Provide a general interpretation of the results in the context of other evidence, and implications for future research.                                       | 17-18 |
| <b>FUNDING</b> |    |                                                                                                                                                               |       |
| Funding        | 27 | Describe sources of funding for the systematic review and other support (e.g., supply of data); role of funders for the systematic review.                    | 19    |

From: Moher D, Liberati A, Tetzlaff J, Altman DG, The PRISMA Group (2009). Preferred Reporting Items for Systematic Reviews and Meta-Analyses: The PRISMA Statement. PLoS Med 6(6): e1000097. doi:10.1371/journal.pmed1000097

For more information, visit: [www.prisma-statement.org](http://www.prisma-statement.org).

Page 2 of 2
