# Supplementary material for: A systematic review and meta-analysis of trials of social network interventions in type 2 diabetes
Source: PubMed Central journal article supplement — BMJ Open. 2017 Aug 21;7(8):e016506. doi: 10.1136/bmjopen-2017-016506 (PMC5629689; doi:10.1136/bmjopen-2017-016506), 2017-08-21
Supplement: bmjopen-2017-016506supp001.pdf [file bmjopen-2017-016506supp001.pdf]

**Supplemental Material**

**A systematic review of social network interventions in patients with type 2 diabetes**

**Ovid MEDLINE(R) In-Process & Other Non-Indexed Citations and Ovid MEDLINE(R) 1946 to Present**

|   |                                                                                                                                                                                                                                                                                                |        |          |
|---|------------------------------------------------------------------------------------------------------------------------------------------------------------------------------------------------------------------------------------------------------------------------------------------------|--------|----------|
| 1 | *diabetes mellitus, type 2/ or "type 2 diabet*".tw. or niddm.mp. or t2dm.mp. [mp=title, abstract, original title, name of substance word, subject heading word, keyword heading word, protocol supplementary concept word, rare disease supplementary concept word, unique identifier]         | 114218 | Advanced |
| 2 | ("social network" or "social support").mp. [mp=title, abstract, original title, name of substance word, subject heading word, keyword heading word, protocol supplementary concept word, rare disease supplementary concept word, unique identifier]                                           | 69042  | Advanced |
| 3 | 1 and 2                                                                                                                                                                                                                                                                                        | 663    | Advanced |
| 4 | family relations/ or family conflict/ or intergenerational relations/ or sibling relations/                                                                                                                                                                                                    | 15431  | Advanced |
| 5 | family/ or adult children/ or family relations/                                                                                                                                                                                                                                                | 73608  | Advanced |
| 6 | family role/ or family therapy/                                                                                                                                                                                                                                                                | 7952   | Advanced |
| 7 | 1 and (4 or 5 or 6)                                                                                                                                                                                                                                                                            | 536    | Advanced |
| 8 | (couple or couples or married or spous* or partner*1 or household or neighbor*1).mp. [mp=title, abstract, original title, name of substance word, subject heading word, keyword heading word, protocol supplementary concept word, rare disease supplementary concept word, unique identifier] | 231588 | Advanced |
| 9 | (church* or religious* or husband* or wife* or relatives or "family based").mp. [mp=title, abstract, original title, name of substance word, subject heading word, keyword heading word, protocol supplementary concept                                                                        | 110536 | Advanced |

|    |                                                                                                                                                                                                                                                                                             |      |          |
|----|---------------------------------------------------------------------------------------------------------------------------------------------------------------------------------------------------------------------------------------------------------------------------------------------|------|----------|
|    | word, rare disease supplementary concept word, unique identifier]                                                                                                                                                                                                                           |      |          |
| 10 | 1 and 8                                                                                                                                                                                                                                                                                     | 749  | Advanced |
| 11 | 1 and 9                                                                                                                                                                                                                                                                                     | 1089 | Advanced |
| 12 | 7 or 10 or 11                                                                                                                                                                                                                                                                               | 2151 | Advanced |
| 13 | limit 12 to randomized controlled trial                                                                                                                                                                                                                                                     | 87   | Advanced |
| 14 | 12 and intervention*.mp. [mp=title, abstract, original title, name of substance word, subject heading word, keyword heading word, protocol supplementary concept word, rare disease supplementary concept word, unique identifier]                                                          | 290  | Advanced |
| 15 | 12 and (behavior* or behaviour* or adher* or education* or aware* or stigma*).mp. [mp=title, abstract, original title, name of substance word, subject heading word, keyword heading word, protocol supplementary concept word, rare disease supplementary concept word, unique identifier] | 573  | Advanced |
| 16 | 13 or 14                                                                                                                                                                                                                                                                                    | 330  | Advanced |
| 17 | 3 or 7 or 12                                                                                                                                                                                                                                                                                | 2695 | Advanced |
| 18 | intervention*.mp. and 17 [mp=title, abstract, original title, name of substance word, subject heading word, keyword heading word, protocol supplementary concept word, rare disease supplementary concept word, unique identifier]                                                          | 512  | Advanced |
| 19 | 13 or 18                                                                                                                                                                                                                                                                                    | 552  | Advanced |

|    |                                                                                                                                                                                                                              |     |          |
|----|------------------------------------------------------------------------------------------------------------------------------------------------------------------------------------------------------------------------------|-----|----------|
| 20 | 17 and random*.mp. [mp=title, abstract, original title, name of substance word, subject heading word, keyword heading word, protocol supplementary concept word, rare disease supplementary concept word, unique identifier] | 338 | Advanced |
| 21 | 19 or 20                                                                                                                                                                                                                     | 676 | Advanced |
| 22 | remove duplicates from 21                                                                                                                                                                                                    | 665 |          |

CENTRAL – same strategy – 205

| Embase 1988 to 2017 Week 16 |                                                                                                                                                                                                                      |         |             |
|-----------------------------|----------------------------------------------------------------------------------------------------------------------------------------------------------------------------------------------------------------------|---------|-------------|
| #                           | Searches                                                                                                                                                                                                             | Results | Search Type |
| 1                           | *diabetes mellitus, type 2/ or "type 2 diabet*".tw. or niddm.mp. or t2dm.mp. [mp=title, abstract, heading word, drug trade name, original title, device manufacturer, drug manufacturer, device trade name, keyword] | 142471  | Advanced    |
| 2                           | ("social network" or "social support").mp. [mp=title, abstract, heading word, drug trade name, original title, device manufacturer, drug manufacturer, device trade name, keyword]                                   | 79400   | Advanced    |
| 3                           | 1 and 2                                                                                                                                                                                                              | 645     | Advanced    |
| 4                           | family relations/ or family conflict/ or intergenerational relations/ or sibling relations/                                                                                                                          | 69298   | Advanced    |

|    |                                                                                                                                                                                                                              |        |          |
|----|------------------------------------------------------------------------------------------------------------------------------------------------------------------------------------------------------------------------------|--------|----------|
| 5  | family/ or adult children/ or family relations/                                                                                                                                                                              | 70584  | Advanced |
| 6  | family role/ or family therapy/                                                                                                                                                                                              | 8709   | Advanced |
| 7  | 1 and (4 or 5 or 6)                                                                                                                                                                                                          | 439    | Advanced |
| 8  | (couple or couples or married or spous* or partner*1 or household or neighbor*1).mp. [mp=title, abstract, heading word, drug trade name, original title, device manufacturer, drug manufacturer, device trade name, keyword] | 265365 | Advanced |
| 9  | (church* or religious* or husband* or wife* or relatives or "family based").mp. [mp=title, abstract, heading word, drug trade name, original title, device manufacturer, drug manufacturer, device trade name, keyword]      | 109824 | Advanced |
| 10 | 1 and 8                                                                                                                                                                                                                      | 1041   | Advanced |
| 11 | 1 and 9                                                                                                                                                                                                                      | 1305   | Advanced |
| 12 | 7 or 10 or 11                                                                                                                                                                                                                | 2620   | Advanced |
| 13 | 3 or 12                                                                                                                                                                                                                      | 3134   | Advanced |
| 14 | 13 and intervention*.mp. [mp=title, abstract, heading word, drug trade name, original title, device manufacturer, drug manufacturer, device trade name, keyword]                                                             | 653    | Advanced |
| 15 | randomized controlled trial/                                                                                                                                                                                                 | 376080 | Advanced |
| 16 | 13 and 15                                                                                                                                                                                                                    | 158    | Advanced |

|    |                                                                                                                                                            |        |          |
|----|------------------------------------------------------------------------------------------------------------------------------------------------------------|--------|----------|
| 17 | 13 and random*.mp. [mp=title, abstract, heading word, drug trade name, original title, device manufacturer, drug manufacturer, device trade name, keyword] | 410    | Advanced |
| 18 | 14 or 16 or 17                                                                                                                                             | 847    | Advanced |
| 19 | limit 18 to human                                                                                                                                          | 796    | Advanced |
| 20 | non insulin dependent diabetes mellitus/                                                                                                                   | 166150 | Advanced |
| 21 | 19 and 20                                                                                                                                                  | 665    |          |

**PsycINFO** 1987 to April Week 2 2017

| # | Searches                                                                                                                                                                           | Results | Search Type |
|---|------------------------------------------------------------------------------------------------------------------------------------------------------------------------------------|---------|-------------|
| 1 | diabetes mellitus/                                                                                                                                                                 | 4189    | Advanced    |
| 2 | 1 and ("type 2" or noninsulin* or "non insulin" or niddm or t2d or t2dm).mp. [mp=title, abstract, heading word, table of contents, key concepts, original title, tests & measures] | 1815    | Advanced    |
| 3 | exp social support/                                                                                                                                                                | 26965   | Advanced    |
| 4 | social networks/ or exp social groups/ or exp social interaction/ or exp social support/ or exp support groups/                                                                    | 276211  | Advanced    |
| 5 | 2 and (3 or 4)                                                                                                                                                                     | 90      | Advanced    |

|    |                                                                                                                                            |        |          |
|----|--------------------------------------------------------------------------------------------------------------------------------------------|--------|----------|
| 6  | exp Family Therapy/ or family.mp. or exp Family Relations/ or exp Family/ or exp Family Systems Theory/ or exp Family Structure/           | 282330 | Advanced |
| 7  | couples/ or cohabitation/ or dyads/ or significant others/ or exp spouses/                                                                 | 25371  | Advanced |
| 8  | 2 and (6 or 7)                                                                                                                             | 195    | Advanced |
| 9  | 5 or 8                                                                                                                                     | 258    | Advanced |
| 10 | limit 9 to ("0830 systematic review" or 1200 meta analysis)                                                                                | 1      | Advanced |
| 11 | 9 and (intervention* or random*).mp. [mp=title, abstract, heading word, table of contents, key concepts, original title, tests & measures] | 78     | Advanced |
| 12 | 10 or 11                                                                                                                                   | 79     | Advanced |
| 13 | limit 12 to all journals                                                                                                                   | 55     |          |

#### CINAHL

| #   | Query                                                             | Limiters/Expanders            | Last Run Via                                                                                                    | Results |
|-----|-------------------------------------------------------------------|-------------------------------|-----------------------------------------------------------------------------------------------------------------|---------|
| S12 | S8 AND S11                                                        | Search modes - Boolean/Phrase | Interface - EBSCOhost Research Databases<br>Search Screen - Advanced Search<br>Database - CINAHL with Full Text | 9       |
| S11 | S5 AND S10                                                        | Search modes - Boolean/Phrase | Interface - EBSCOhost Research Databases<br>Search Screen - Advanced Search<br>Database - CINAHL with Full Text | 78      |
| S10 | (MH "Family+") OR (MH "Family Relations+") OR (MH "Patient-Family | Search modes - Boolean/Phrase | Interface - EBSCOhost Research Databases<br>Search Screen - Advanced Search                                     | 123,032 |

|    |                                                                                                                                                           |                               |                                                                                                                 |         |
|----|-----------------------------------------------------------------------------------------------------------------------------------------------------------|-------------------------------|-----------------------------------------------------------------------------------------------------------------|---------|
|    | Relations") OR (MH "Nuclear Family+") OR (MH "Family Attitudes+")                                                                                         |                               | Database - CINAHL with Full Text                                                                                |         |
| S9 | S5 AND S8                                                                                                                                                 | Search modes - Boolean/Phrase | Interface - EBSCOhost Research Databases<br>Search Screen - Advanced Search<br>Database - CINAHL with Full Text | 75      |
| S8 | S6 OR S7                                                                                                                                                  | Search modes - Boolean/Phrase | Interface - EBSCOhost Research Databases<br>Search Screen - Advanced Search<br>Database - CINAHL with Full Text | 129,321 |
| S7 | (MH "Intervention Trials") OR "intervention"                                                                                                              | Search modes - Boolean/Phrase | Interface - EBSCOhost Research Databases<br>Search Screen - Advanced Search<br>Database - CINAHL with Full Text | 111,076 |
| S6 | (MH "Randomized Controlled Trials")                                                                                                                       | Search modes - Boolean/Phrase | Interface - EBSCOhost Research Databases<br>Search Screen - Advanced Search<br>Database - CINAHL with Full Text | 25,142  |
| S5 | S1 AND S4                                                                                                                                                 | Search modes - Boolean/Phrase | Interface - EBSCOhost Research Databases<br>Search Screen - Advanced Search<br>Database - CINAHL with Full Text | 385     |
| S4 | S2 OR S3                                                                                                                                                  | Search modes - Boolean/Phrase | Interface - EBSCOhost Research Databases<br>Search Screen - Advanced Search<br>Database - CINAHL with Full Text | 48,947  |
| S3 | (MH "Young Adult Social Support Index") OR (MH "Social Support Index") OR (MH "Social Support (Iowa NOC)") OR (MH "Norbeck Social Support Questionnaire") | Search modes - Boolean/Phrase | Interface - EBSCOhost Research Databases<br>Search Screen - Advanced Search<br>Database - CINAHL with Full Text | 289     |
| S2 | (MH "Social Networks") OR (MH "Social Network Analysis (Saba CCC)") OR (MH "Support, Psychosocial+")                                                      | Search modes - Boolean/Phrase | Interface - EBSCOhost Research Databases<br>Search Screen - Advanced Search<br>Database - CINAHL with Full Text | 48,840  |
| S1 | (MH "Diabetes Mellitus, Type 2")                                                                                                                          | Search modes - Boolean/Phrase | Interface - EBSCOhost Research Databases<br>Search Screen - Advanced Search<br>Database - CINAHL with Full Text | 26,607  |

Supplement Table S1. Search strategy



| Study                | Notable inclusion criteria                                                                      | Intervention |                        |                                     | Control |                        |                                     |
|----------------------|-------------------------------------------------------------------------------------------------|--------------|------------------------|-------------------------------------|---------|------------------------|-------------------------------------|
|                      |                                                                                                 | N            | Mean Age in years (SD) | Mean duration of T2DM in years (SD) | N       | Mean Age in years (SD) | Mean duration of T2DM in years (SD) |
| Wing 1991            | >20% above ideal above weight                                                                   | 25           | 53.6 (7.7)             | NR                                  | 24      | 51.2 (7.3)             | NR                                  |
| Brown 2002           | None                                                                                            | 128          | 54.7 (8.2)             | 7.6 (5.8)                           | 128     | 53.3 (8.3)             | 8.1 (6.9)                           |
| Sammuel - Hodge 2002 | A1C>8%                                                                                          | 117          | 57 (9.7)               | 9 (NR)                              | 84      | 61.3 (11.9)            | 11 (NR)                             |
| Pearce 2008          | No history of ketoacidosis                                                                      | 108          | 61.2 (10.59)           | NR                                  | 91      | 63.1 (8.63)            | NR                                  |
| Kang 2010            | At least two of last three A1C reading $\geq$ 7%; used oral antidiabetic agents only            | 33           | 55.3 (7.7)             | 3.8 (3.2)                           | 34      | 51.7 (8.5)             | 4.4 (3)                             |
| Toobert 2011         | 2 out of 3 LAST A1Cs $>$ 8%                                                                     | 142          | 55.6 (9.7)             | 8.4 (6.5)                           | 138     | 58.7 (10.3)            | 10.4 (9.8)                          |
| Greene 2015          | Latinas                                                                                         | 21           | NR                     | NR                                  | 27      | NR                     | NR                                  |
| Keogh 2011           | Married for $>$ 1 year; A1C $>$ 7.3%                                                            | 60           | 59.96 (11.67)          | 9.17 (7.1)                          | 61      | 57.9 (11.34)           | 9.65 (6.45)                         |
| Trief 2011           | $>$ 60 years old; Mexican American; documented difficulties with health habits                  | 12           | 60.33 (8.63)           | 8.63 (NR)                           | 12      | 61.08 (9.27)           | 9.27 (NR)                           |
| Haltiwanger 2012     | $>$ 30 years old; medium or low adherence; low social support                                   | 12           | NR                     | NR                                  | 36      | NR                     | NR                                  |
| Khosravizade 2014    | A1C $>$ 7% or FBS $>$ 110mg/dl                                                                  | 45           | 52.93 (7.62)           | 9.71 (6.75)                         | 46      | 54.13 (7.56)           | 11.39 (5.4)                         |
| Shaya 2014           | Latina; mother to overweight woman                                                              | 68           | 53.9 (NR)              | 9.2 (8.6)                           | 70      | 51.9 (NR)              | 8.8 (8.2)                           |
| Sorkin 2014          | African American                                                                                | 53           | 52.7 (6.9)             | 9.8 (NR)                            | 36      | 52.7 (6.9)             | 9.8 (NR)                            |
| Baig 2015            | Diagnosis of diabetes by a physician                                                            | 50           | 51.7 (11.6)            | 8.7 (8.67)                          | 50      | 55.7 (11.4)            | 7.8 (7.14)                          |
| Kasteleyn 2015       | $>$ 35 years old; within 2 weeks from hospital discharge after first acute coronary event       | 101          | 66 (9.3)               | 7.0 (2.8-16)                        | 100     | 65.6 (9.4)             | 8.5 (5-15)                          |
| Trief 2016           | Married or with partner for $>$ 1 year; A1C $>$ 7.5%                                            | 97           | 57.8 (10.8)            | 12.8 (8.5)                          | 78      | 56.9 (10.4)            | 12.6 (8.3)                          |
| McEwen 2017          | Mexican American                                                                                | 83           | 53.64 (9.6)            | 11.92                               | 74      | 53.41 (8.4)            | 11.05                               |
| Samuel-Hodge 2017    | African American; overweight or obese; A1C $\leq$ 11%                                           | 36           | 54.6 (10.55)           | 7.3 (NR)                            | 18      | 52.8 (8.56)            | 5.4 (NR)                            |
| Wichit 2017          | $\geq$ 35 years old; T2DM duration of $\geq$ 6 months and living in Thachang District, Thailand | 70           | 61.3 (11.6)            | 6.0 (4.7) 6.0 (4.7)                 | 70      | 55.5 (10.5)            | 5.4 (4.3)                           |

Supplemental Table S2. Trial inclusion criteria and participant baseline characteristics

|                   | Random sequence generation (selection bias) | Allocation concealment (selection bias) | Blinding of participants and personnel (performance bias) | Blinding of outcome assessment (detection bias) | Incomplete outcome data (attrition bias) | Selective reporting (reporting bias) | Other bias |
|-------------------|---------------------------------------------|-----------------------------------------|-----------------------------------------------------------|-------------------------------------------------|------------------------------------------|--------------------------------------|------------|
| Baig 2015         | ?                                           | ?                                       | -                                                         | ?                                               | -                                        | +                                    | ?          |
| Brown 2002        | ?                                           | ?                                       | -                                                         | +                                               | +                                        | +                                    | ?          |
| Greene 2015       | ?                                           | ?                                       | -                                                         | ?                                               | ?                                        | ?                                    | ?          |
| Haltiwanger 2012  | +                                           | ?                                       | -                                                         | ?                                               | -                                        | -                                    | ?          |
| Kang 2010         | +                                           | ?                                       | -                                                         | ?                                               | +                                        | +                                    | ?          |
| Kasteleyn 2014    | +                                           | ?                                       | -                                                         | ?                                               | +                                        | +                                    | ?          |
| Keogh 2011        | +                                           | +                                       | -                                                         | +                                               | +                                        | -                                    | ?          |
| Khosrazivade 2014 | ?                                           | ?                                       | -                                                         | ?                                               | +                                        | ?                                    | ?          |
| McEwen 2017       | +                                           | +                                       | -                                                         | -                                               | -                                        | -                                    | ?          |
| Pearce 2008       | +                                           | +                                       | -                                                         | ?                                               | ?                                        | -                                    | ?          |
| Samuel-Hodge 2009 | +                                           | +                                       | -                                                         | +                                               | -                                        | +                                    | ?          |
| Samuel-Hodge 2017 | +                                           | ?                                       | -                                                         | +                                               | +                                        | +                                    | ?          |
| Shaya 2014        | -                                           | ?                                       | -                                                         | ?                                               | -                                        | +                                    | ?          |
| Sorkin 2014       | +                                           | +                                       | -                                                         | ?                                               | +                                        | +                                    | ?          |
| Toobert 2011      | ?                                           | +                                       | -                                                         | +                                               | +                                        | +                                    | ?          |
| Trief 2011        | ?                                           | ?                                       | -                                                         | +                                               | -                                        | +                                    | ?          |
| Trief 2016        | +                                           | +                                       | -                                                         | +                                               | -                                        | -                                    | -          |
| Wichit 2017       | +                                           | -                                       | -                                                         | +                                               | +                                        | +                                    | ?          |
| Wing 1991         | ?                                           | ?                                       | -                                                         | ?                                               | +                                        | ?                                    | ?          |

Supplemental Figure S1. Risk of bias of included trials (Cochrane risk of bias tool)

Assessing confidence in the estimates of effect:  
GRADE

| Quality assessment        |                   |                      |                        |              |                      |                      | N <sup>o</sup> of patients   |                | Effect                                                    | Quality         | Importance |
|---------------------------|-------------------|----------------------|------------------------|--------------|----------------------|----------------------|------------------------------|----------------|-----------------------------------------------------------|-----------------|------------|
| N <sup>o</sup> of studies | Study design      | Risk of bias         | Inconsistency          | Indirectness | Imprecision          | Other considerations | Social network interventions | Any comparator | Absolute (95% CI)                                         |                 |            |
| Social Support            |                   |                      |                        |              |                      |                      |                              |                |                                                           |                 |            |
| 8                         | randomised trials | serious <sup>1</sup> | serious <sup>2,3</sup> | not serious  | serious <sup>4</sup> | strong association   | 515                          | 471            | SMD 0.74<br><b>higher</b><br>(0.32 higher to 1.15 higher) | Low to moderate | IMPORTANT  |

CI: Confidence interval; SMD: Standardised mean difference

1. unclear blinding of outcome assessors
2. I<sup>2</sup>=90%
3. non-overlapping CIs
4. confidence interval or estimate effect includes non-important change as well as very important change

| Quality assessment        |                   |                      |                      |              |             |                      | N <sup>o</sup> of patients   |                | Effect                                                 | Quality         | Importance |
|---------------------------|-------------------|----------------------|----------------------|--------------|-------------|----------------------|------------------------------|----------------|--------------------------------------------------------|-----------------|------------|
| N <sup>o</sup> of studies | Study design      | Risk of bias         | Inconsistency        | Indirectness | Imprecision | Other considerations | Social network interventions | Any comparator | Absolute (95% CI)                                      |                 |            |
| HbA1c: 3 months           |                   |                      |                      |              |             |                      |                              |                |                                                        |                 |            |
| 9                         | randomised trials | serious <sup>1</sup> | not serious          | not serious  | not serious | none                 | 554                          | 527            | MD 0.25<br><b>lower</b><br>(0.40 lower to 0.11 lower)  | Low to very low | IMPORTANT  |
| HbA1c: 5-7 Months         |                   |                      |                      |              |             |                      |                              |                |                                                        |                 |            |
| 11                        | randomised trials | serious <sup>1</sup> | serious <sup>2</sup> | not serious  | not serious | none                 | 777                          | 727            | MD 0.24<br><b>lower</b><br>(0.52 lower to 0.03 higher) | Low to very low | IMPORTANT  |

| Quality assessment        |                   |                      |                           |              |                      |                      | N <sup>o</sup> of patients   |                | Effect                                             | Quality         | Importance |
|---------------------------|-------------------|----------------------|---------------------------|--------------|----------------------|----------------------|------------------------------|----------------|----------------------------------------------------|-----------------|------------|
| N <sup>o</sup> of studies | Study design      | Risk of bias         | Inconsistency             | Indirectness | Imprecision          | Other considerations | Social network interventions | Any comparator | Absolute (95% CI)                                  |                 |            |
| HbA1c: 8+ months          |                   |                      |                           |              |                      |                      |                              |                |                                                    |                 |            |
| 3                         | randomised trials | serious <sup>1</sup> | very serious <sup>2</sup> | not serious  | serious <sup>3</sup> | none                 | 355                          | 319            | MD <b>0.1 lower</b><br>(0.84 lower to 0.65 higher) | Low to very low | IMPORTANT  |
| HbA1c: Longest follow-up  |                   |                      |                           |              |                      |                      |                              |                |                                                    |                 |            |
| 17                        | randomised trials | serious <sub>1</sub> | not serious               | not serious  | not serious          | none                 | 1134                         | 1048           | MD <b>0.16 lower</b><br>(0.32 lower to 0)          | Low to very low | IMPORTANT  |

CI: Confidence interval; MD: Mean difference

1. unclear allocation concealment
2. high I2
3. large CI

| Quality assessment                  |                   |                      |                             |              |                           |                      | N <sup>o</sup> of patients   |                | Effect                                                | Quality         | Importance |
|-------------------------------------|-------------------|----------------------|-----------------------------|--------------|---------------------------|----------------------|------------------------------|----------------|-------------------------------------------------------|-----------------|------------|
| N <sup>o</sup> of studies           | Study design      | Risk of bias         | Inconsistency               | Indirectness | Imprecision               | Other considerations | Social network interventions | Any comparator | Absolute (95% CI)                                     |                 |            |
| Well-being                          |                   |                      |                             |              |                           |                      |                              |                |                                                       |                 |            |
| 2                                   | randomised trials | serious <sup>1</sup> | very serious <sup>2,3</sup> | not serious  | very serious <sup>4</sup> | none                 | 141                          | 141            | SMD <b>0.62 higher</b><br>(0.13 lower to 1.37 higher) | Low to very low | IMPORTANT  |
| Quality of Life: Physical Component |                   |                      |                             |              |                           |                      |                              |                |                                                       |                 |            |
| 4                                   | randomised trials | serious <sup>1</sup> | not serious                 | not serious  | not serious               | none                 | 284                          | 240            | SMD <b>0.06 higher</b><br>(0.11 lower to 0.23 higher) | Low to very low | IMPORTANT  |
| Quality of Life: Mental Component   |                   |                      |                             |              |                           |                      |                              |                |                                                       |                 |            |

| Quality assessment |                   |                      |               |              |             |                      | N° of patients               |                | Effect                                               | Quality         | Importance |
|--------------------|-------------------|----------------------|---------------|--------------|-------------|----------------------|------------------------------|----------------|------------------------------------------------------|-----------------|------------|
| N° of studies      | Study design      | Risk of bias         | Inconsistency | Indirectness | Imprecision | Other considerations | Social network interventions | Any comparator | Absolute (95% CI)                                    |                 |            |
| 4                  | randomised trials | serious <sup>1</sup> | not serious   | not serious  | not serious | none                 | 284                          | 240            | <b>SMD 0.01 lower</b><br>(0.18 lower to 0.20 higher) | Low to very low | IMPORTANT  |

CI: Confidence interval; SMD: Standardised mean difference

1. unclear allocation concealment
2. high I2
3. differences in scales used
4. very wide CI

### Supplemental Table S3. GRADE assessment

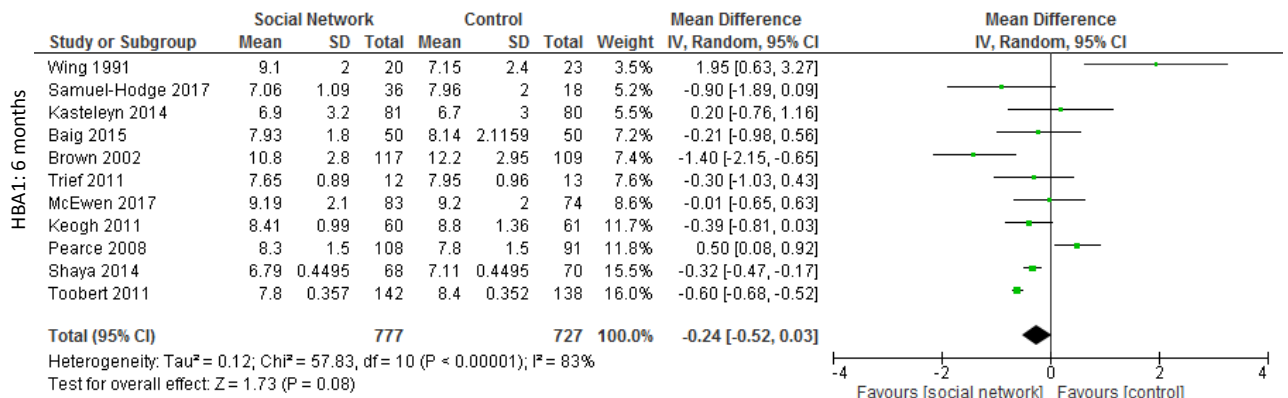

### Supplemental Figure S2. Effect of social network intervention on HbA1c at 6 months follow-up

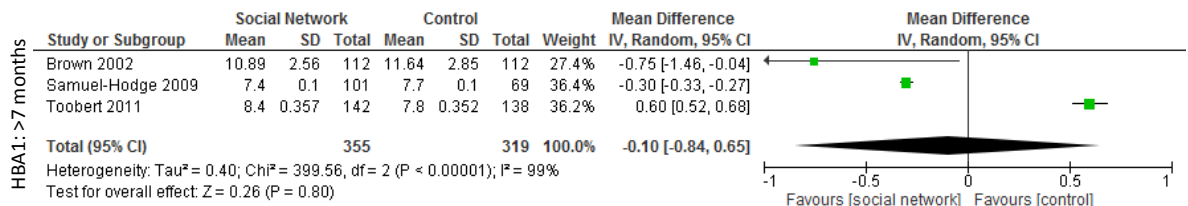

### Supplemental Figure S3. Effect of social network intervention on HbA1c at 8+ months follow-up

## Subgroup Analyses

|                                     | Hba1c at last follow-up                                       |                                                                          |                                | Social support at last follow-up                              |                                                                          |                                |
|-------------------------------------|---------------------------------------------------------------|--------------------------------------------------------------------------|--------------------------------|---------------------------------------------------------------|--------------------------------------------------------------------------|--------------------------------|
|                                     | <b>Subgroup</b><br><i>effect size (95% CI); I<sup>2</sup></i> | <b>Comparison subgroup</b><br><i>effect size (95% CI); I<sup>2</sup></i> | <b>P-value for interaction</b> | <b>Subgroup</b><br><i>effect size (95% CI); I<sup>2</sup></i> | <b>Comparison subgroup</b><br><i>effect size (95% CI); I<sup>2</sup></i> | <b>P-value for interaction</b> |
| <b>Patient characteristics</b>      |                                                               |                                                                          |                                |                                                               |                                                                          |                                |
| Mean baseline HbA1c > 8%            | -0.08 (-0.38, 0.23);<br>62%                                   | -0.28 (-0.40, -0.16);<br>0%                                              | 0.22                           | 0.89 (0.39, 1.38);<br>90%                                     | 0.26 (-0.30, 0.82);<br>65%                                               | 0.10                           |
| <b>Intervention characteristics</b> |                                                               |                                                                          |                                |                                                               |                                                                          |                                |
| Self-selected social network        | -0.20 (-0.41, 0.02);<br>59%                                   | -0.14 (-0.35, 0.06);<br>0%                                               | 0.73                           | 0.77 (0.29, 1.24);<br>91%                                     | 0.56 (0.13, 1.0); NA                                                     | 0.54                           |
| Household member                    | -0.07 (-0.29, 0.014);<br>47%                                  | -0.32 (-0.45, -0.19);<br>0%                                              | 0.05                           | 0.96 (0.36, 1.55);<br>92%                                     | 0.35 (-0.05, 0.76);<br>63%                                               | 0.10                           |
| Contact time >585 minutes           | -0.17 (-0.38, 0.04);<br>5%                                    | -0.34 (-0.59, -0.09);<br>0%                                              | 0.30                           | 0.32 (-0.03, 0.68);<br>27%                                    | 0.82 (0.18, 1.47); 73%                                                   | 0.18                           |
| Underlying framework                | -0.25 (-0.36, -0.15);<br>1%                                   | -0.11 (-0.63, 0.4); 76%                                                  | 0.60                           | 0.34 (0.11, 0.57);<br>43%                                     | 1.39 (0.32, 2.47); 94%                                                   | 0.06                           |
| Dyadic social network reported      | -0.21 (-0.38, -0.04);<br>9%                                   | -0.07 (-0.41, 0.27);<br>77%                                              | 0.46                           | 1.05 (0.38, 1.72);<br>89%                                     | 0.30 (-0.08, 0.67);<br>79%                                               | 0.05                           |
| <b>Trial characteristics</b>        |                                                               |                                                                          |                                |                                                               |                                                                          |                                |
| Low risk of bias                    | -0.18 (-0.49, 0.12);<br>67%                                   | -0.25 (-0.38, -0.13);<br>0%                                              | 0.66                           | 0.59 (0.42, 0.76);<br>0%                                      | 0.94 (-0.03, 1.90);<br>95%                                               | 0.49                           |

Supplemental Table S4. Subgroup analyses
